# Supplementary material
Source: PubMed Central journal article supplement (PMC6400267)
Supplement: NIHMS80782-supplement-Supplementary_Information.pdf [file NIHMS80782-supplement-Supplementary_Information.pdf]

**Supplementary Figure 1: Flowchart depicting the two GWAS and their meta-analysis.** In UKBB (A), we performed sample and variant-based QC to produce a set of approximately 450K related Europeans and 17M variants. We derived four osteoarthritis definitions from self-report and hospital records. We analysed the data adjusting for relatedness. In arcOGEN (B), we imputed the data into HRC panel and performed sample and variant-based QC to produce a set of approximately 14K unrelated Europeans and 11M variants. We derived three osteoarthritis definitions from total joint replacement records or radiographic evidence of disease. Subsequently, we performed a genome-wide fixed-effects meta-analysis (C) across the two cohorts, identifying 64 unique independent signals across the four osteoarthritis definitions.

A

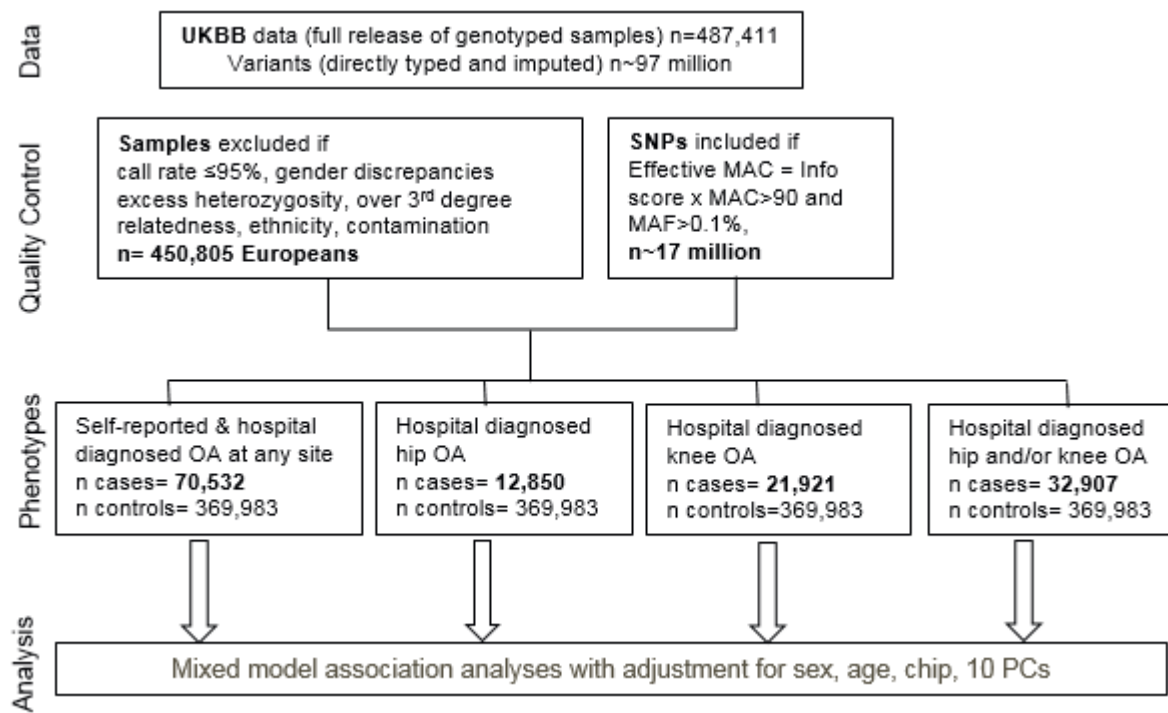

B

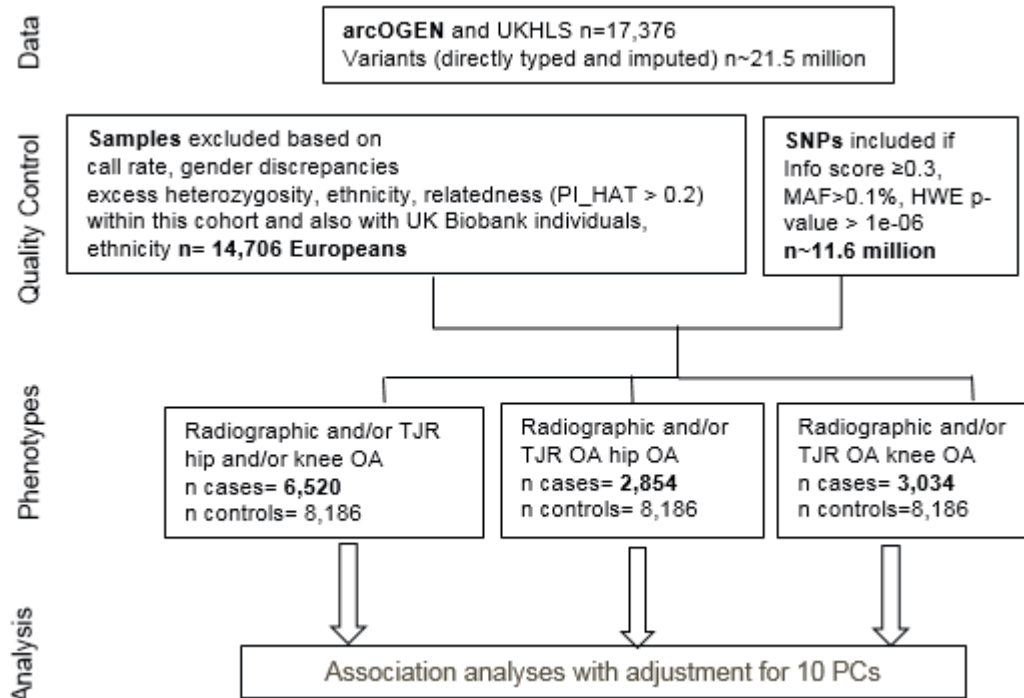

C

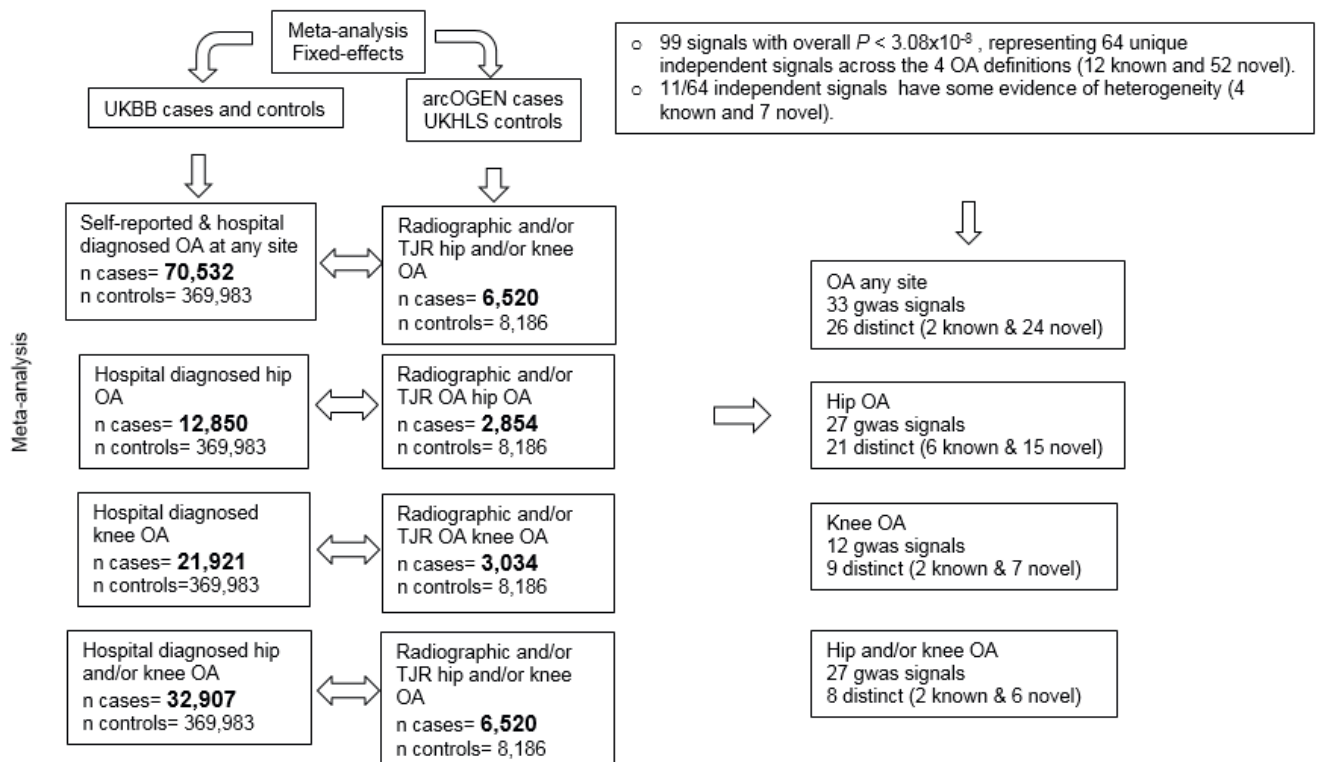

**Supplementary Figure 2: Summary plots of summary statistics in UK Biobank and arcOGEN meta-analysis.** Manhattan and quantile-quantile plots for osteoarthritis (A), knee osteoarthritis (B), hip osteoarthritis (C), knee and/or hip osteoarthritis (D) in UK Biobank and arcOGEN meta-analysis.

A

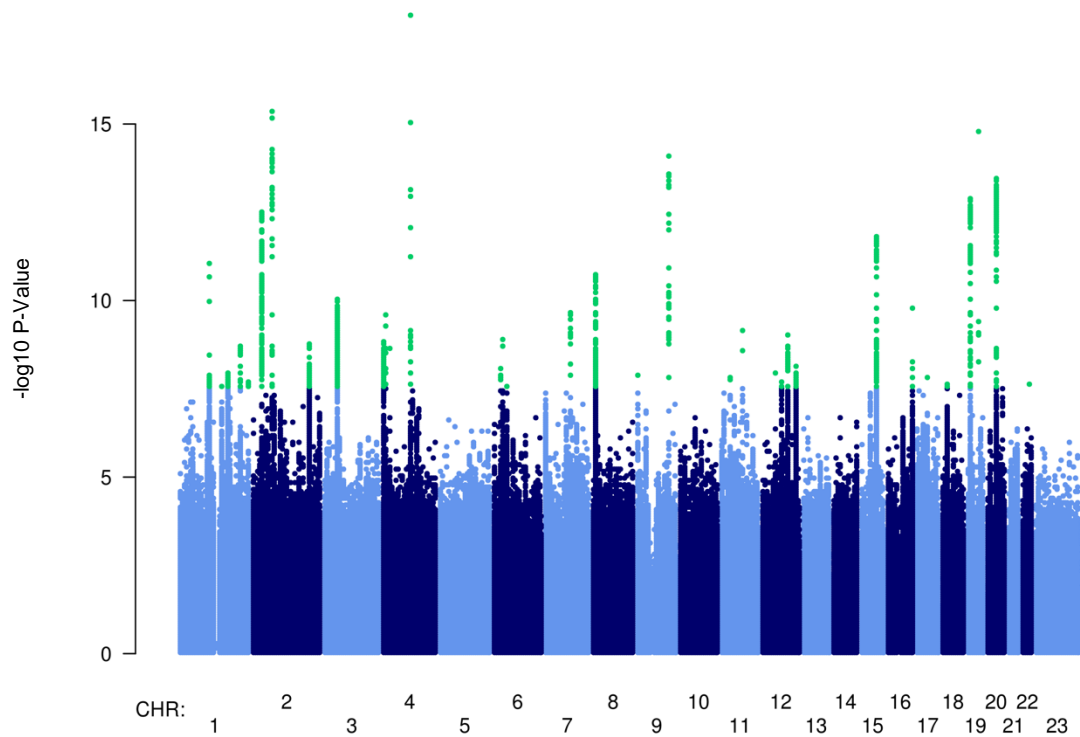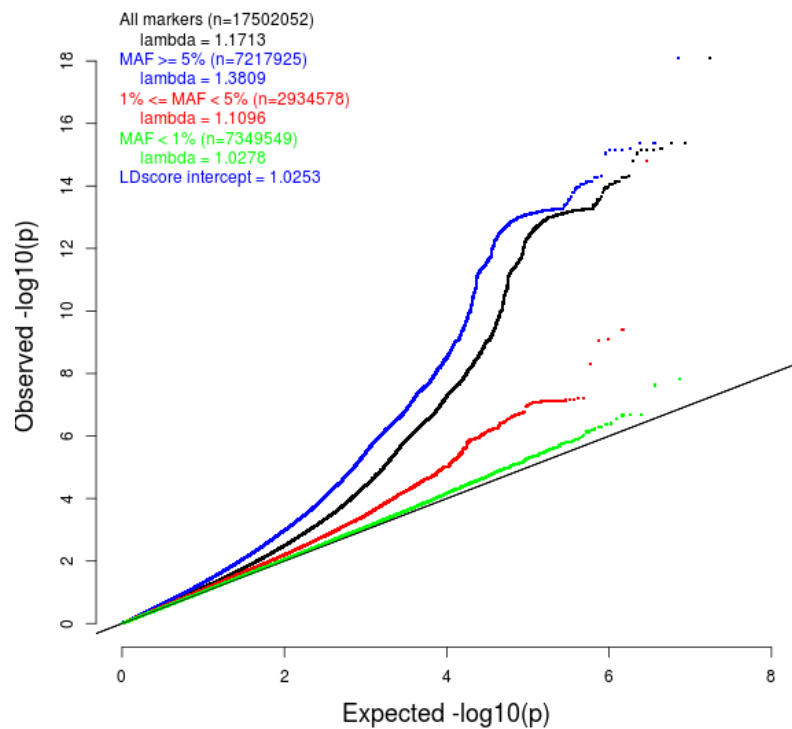

B

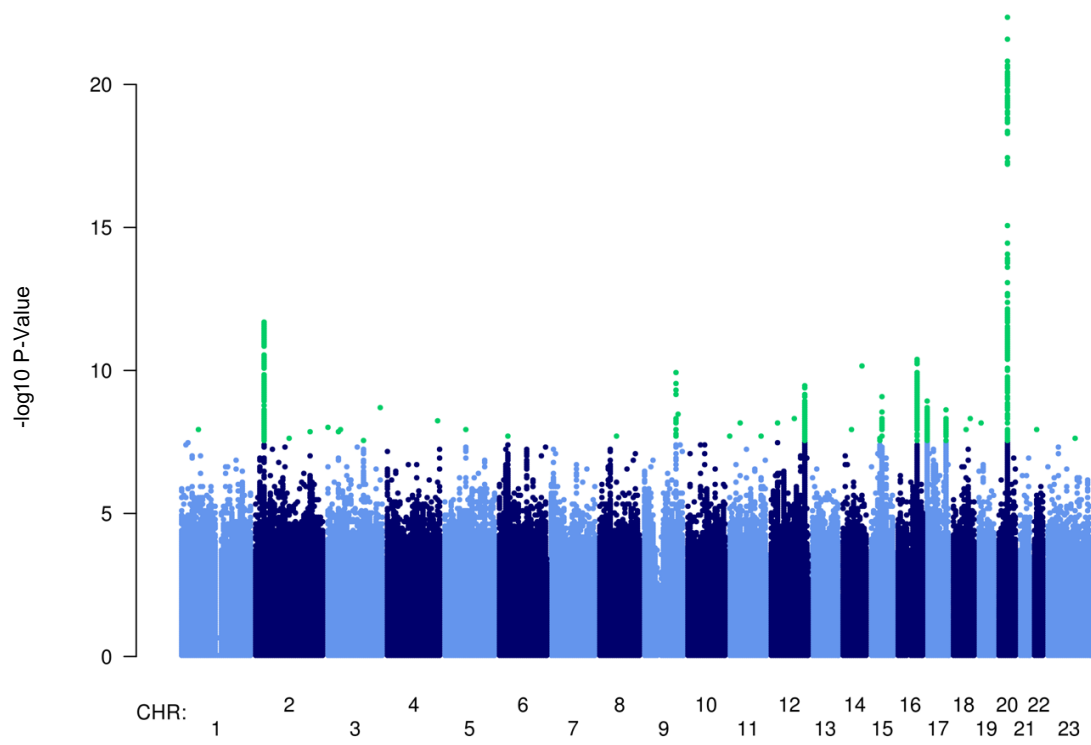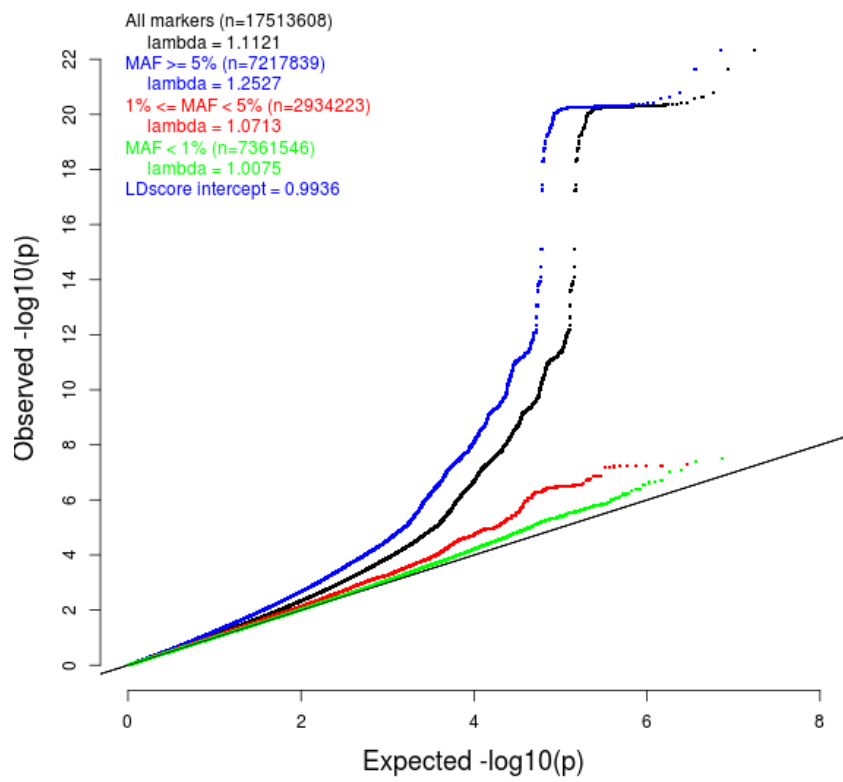

C

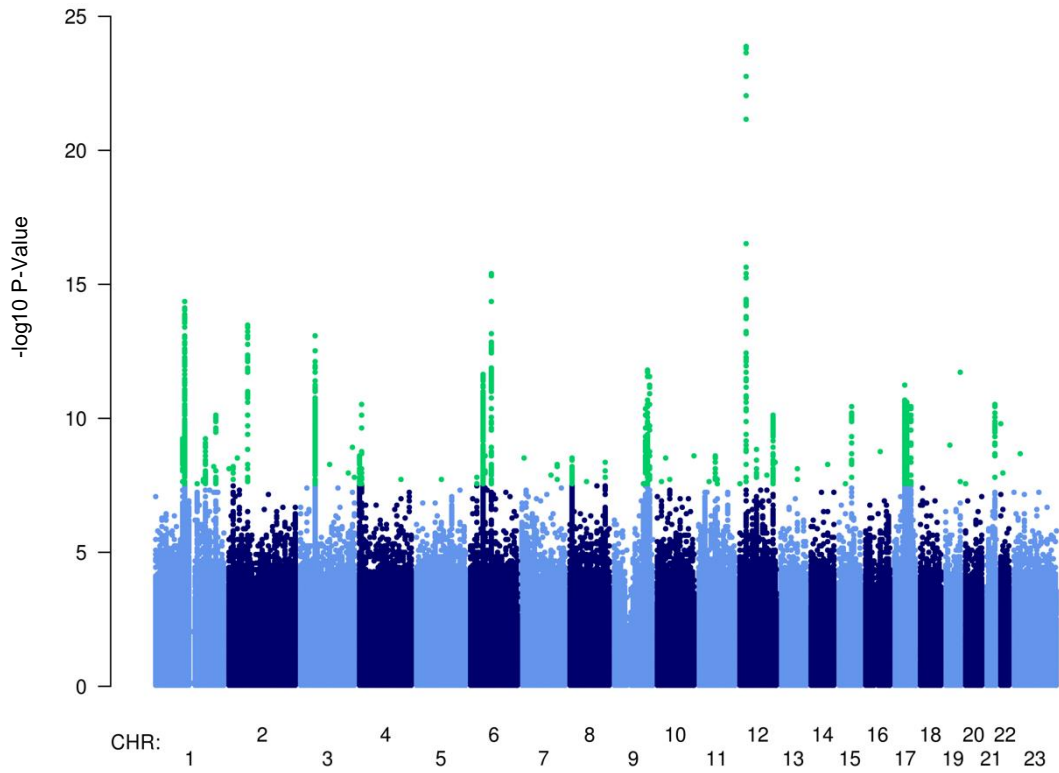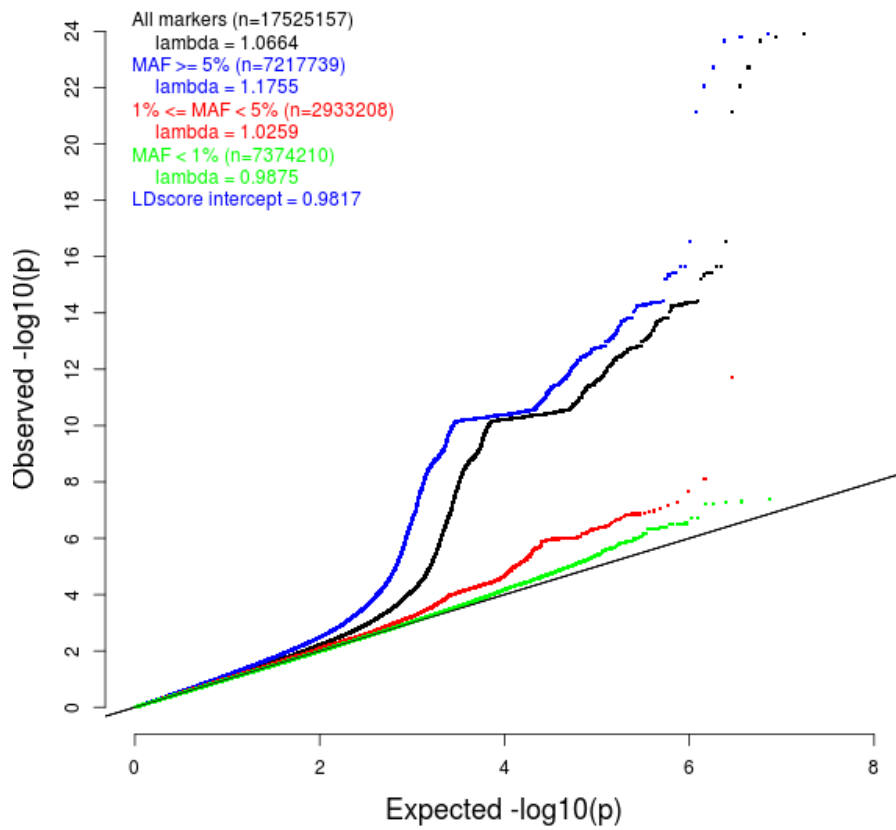

D

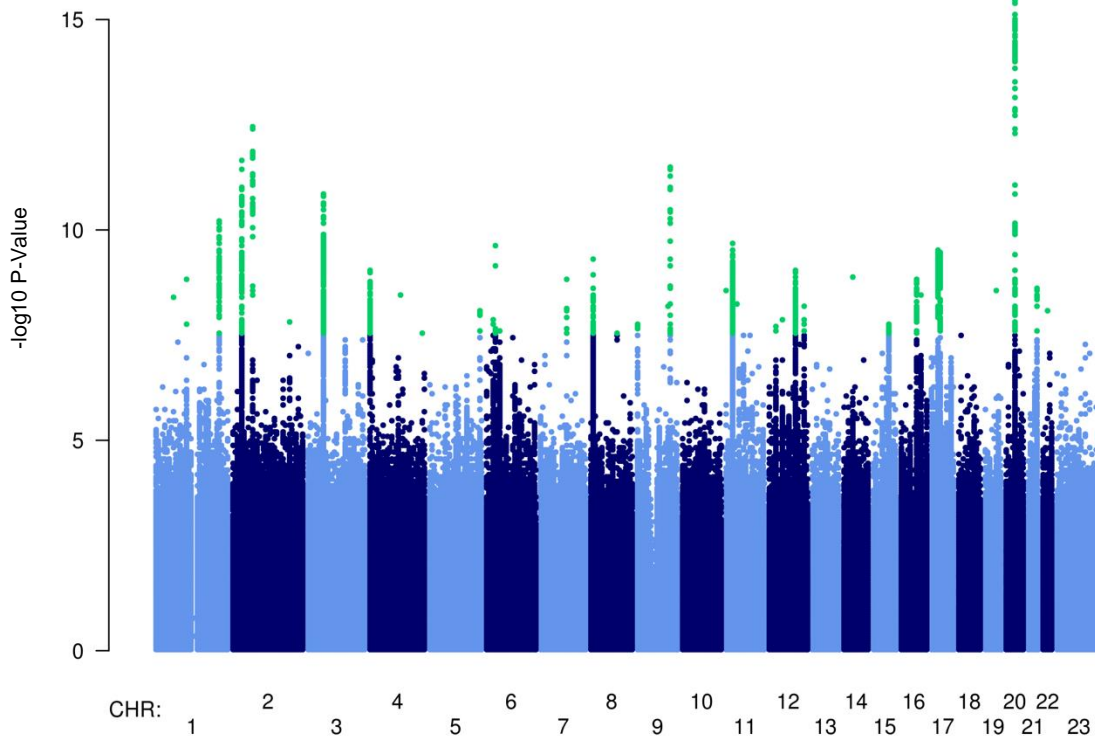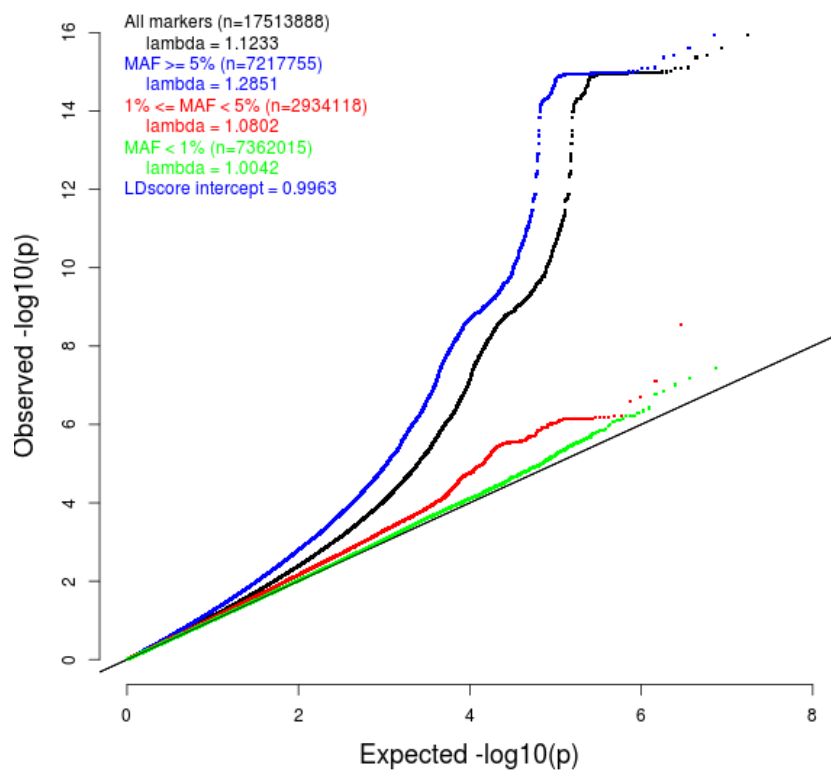

**Supplementary Figure 3: Locus zoom plots for 26 osteoarthritis loci that reached genome-wide significance in the meta-analysis (as reported in Table 1 and Supplementary Table 3), displaying 1Mb each side of the top variant, where the blue circle represents the index variant on the meta-analysis across UK Biobank and arcOGEN. LD is calculated from UK Biobank.**

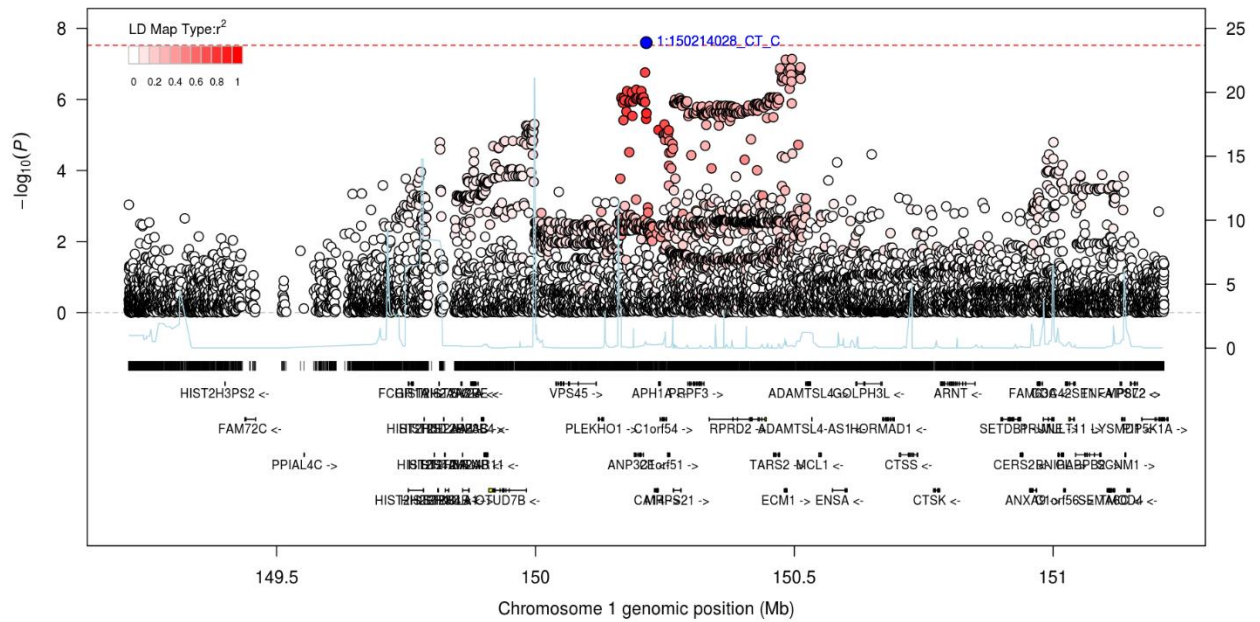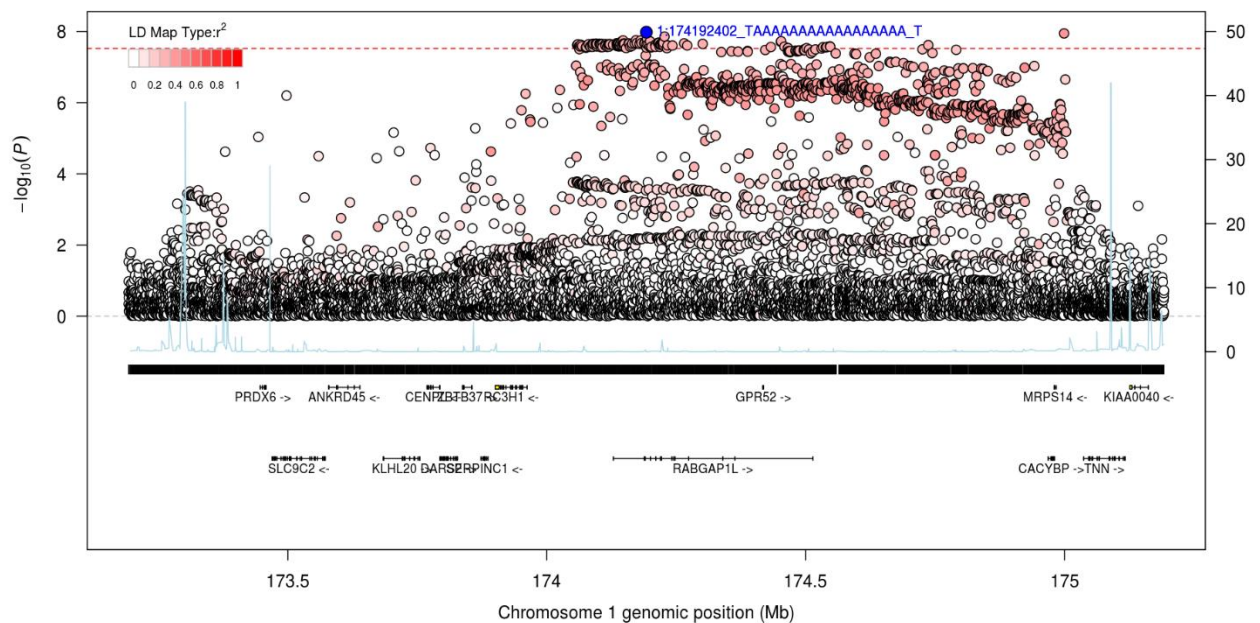

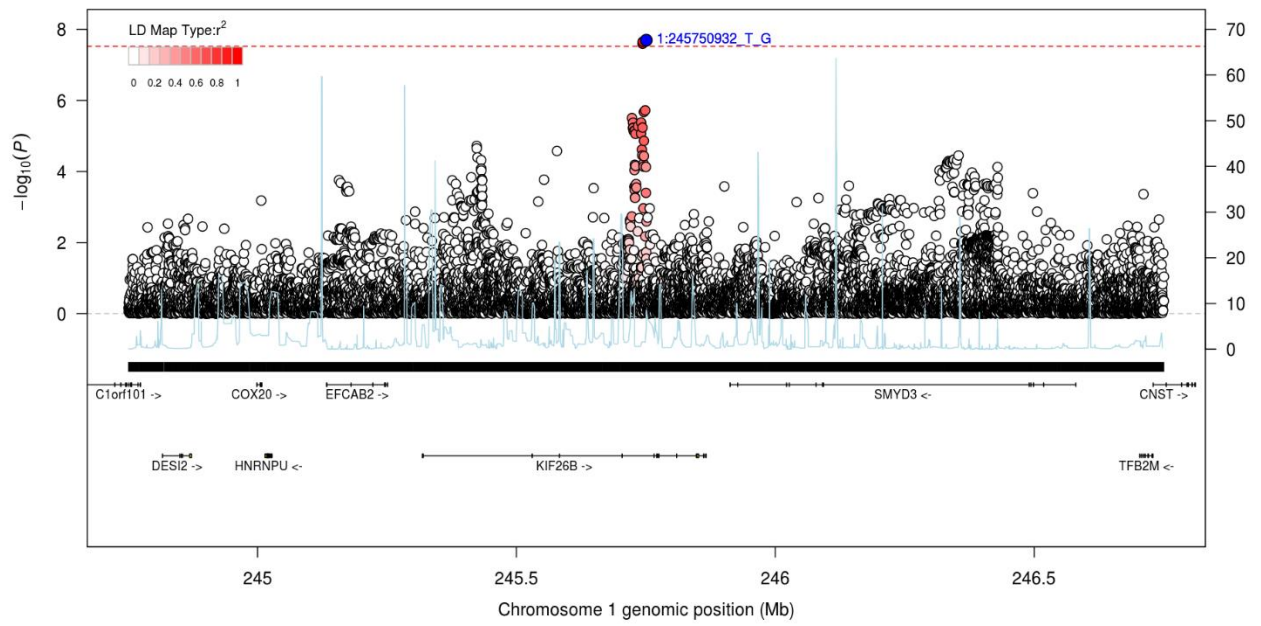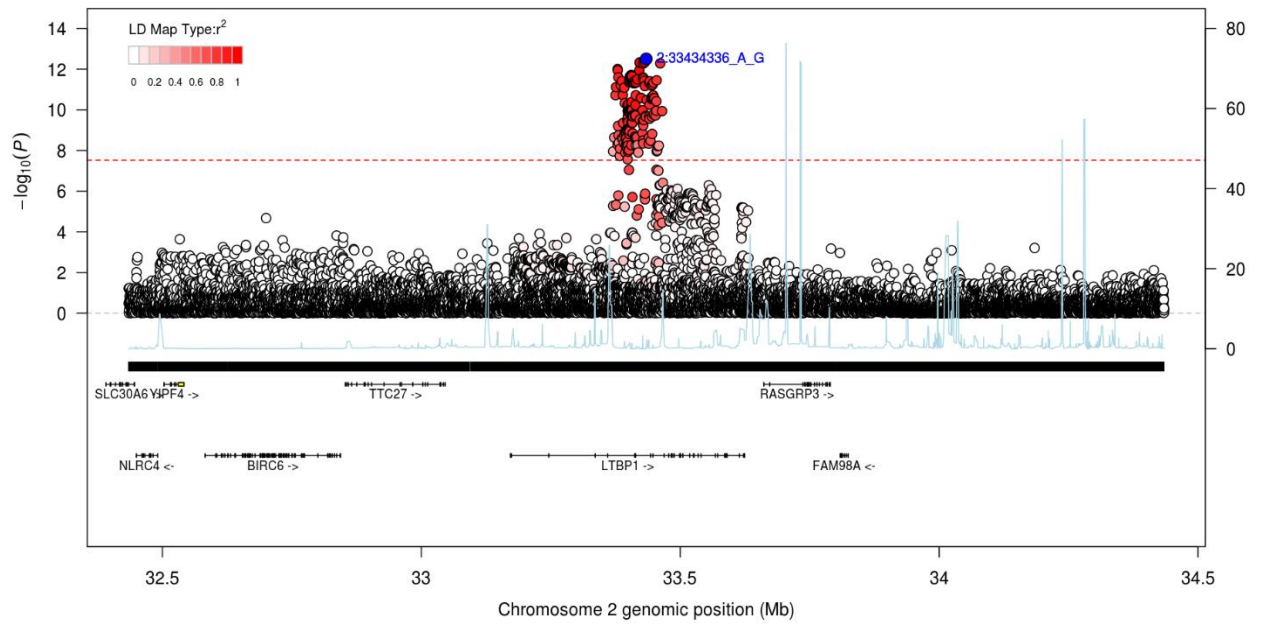



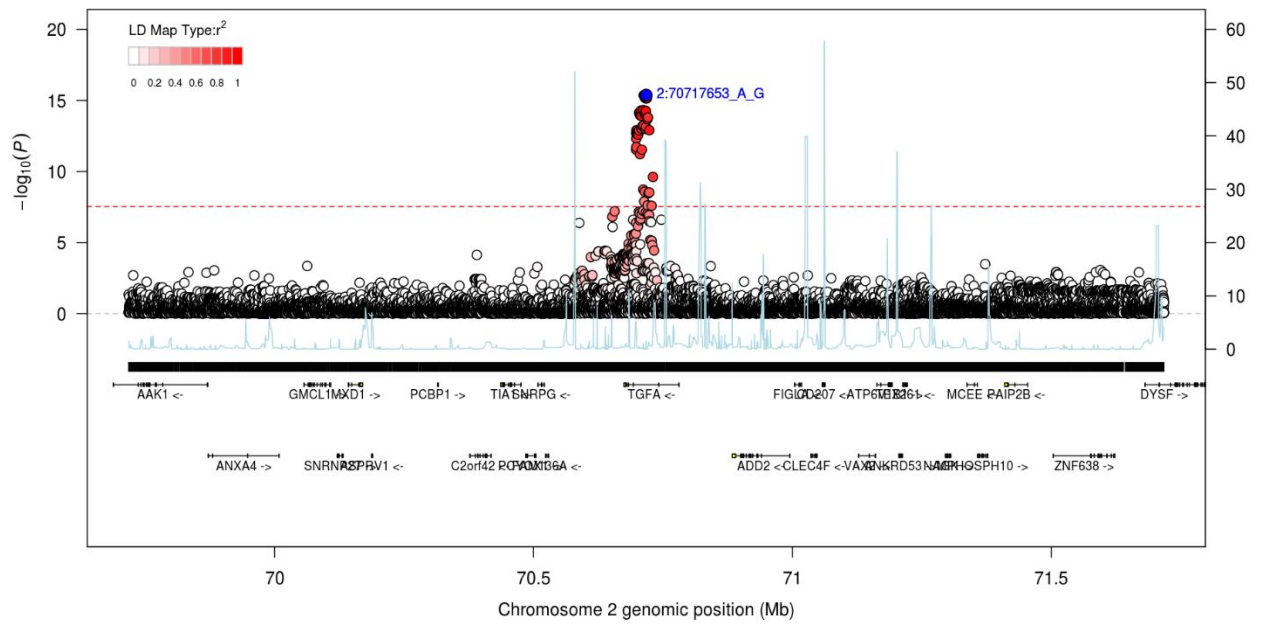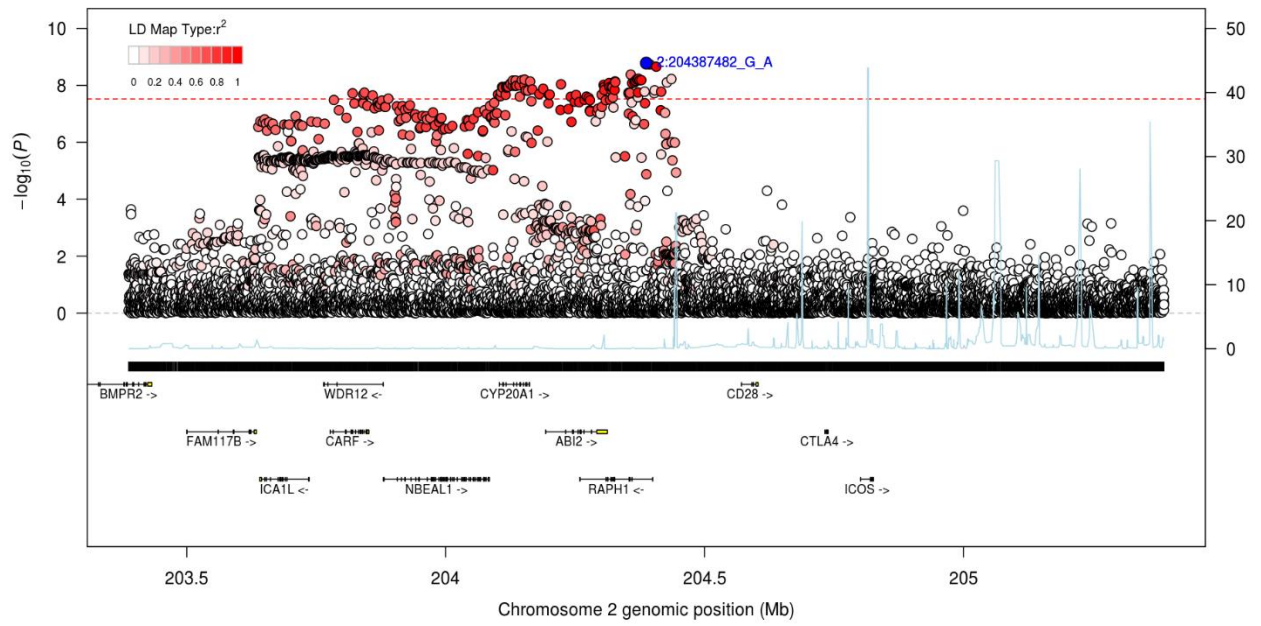

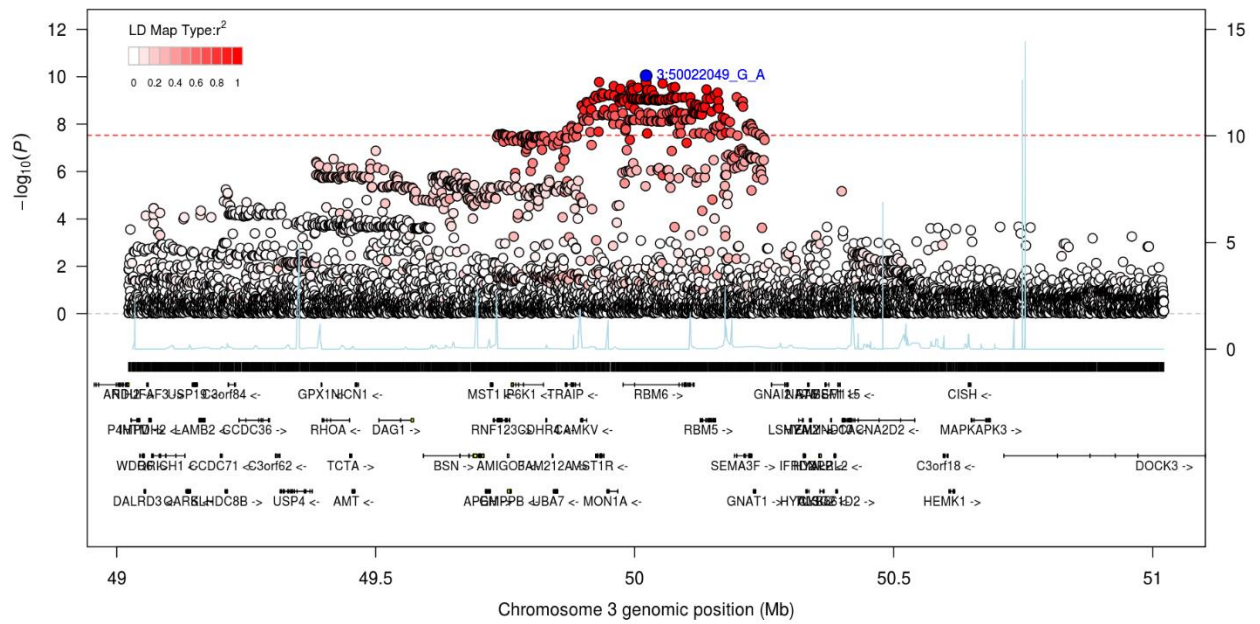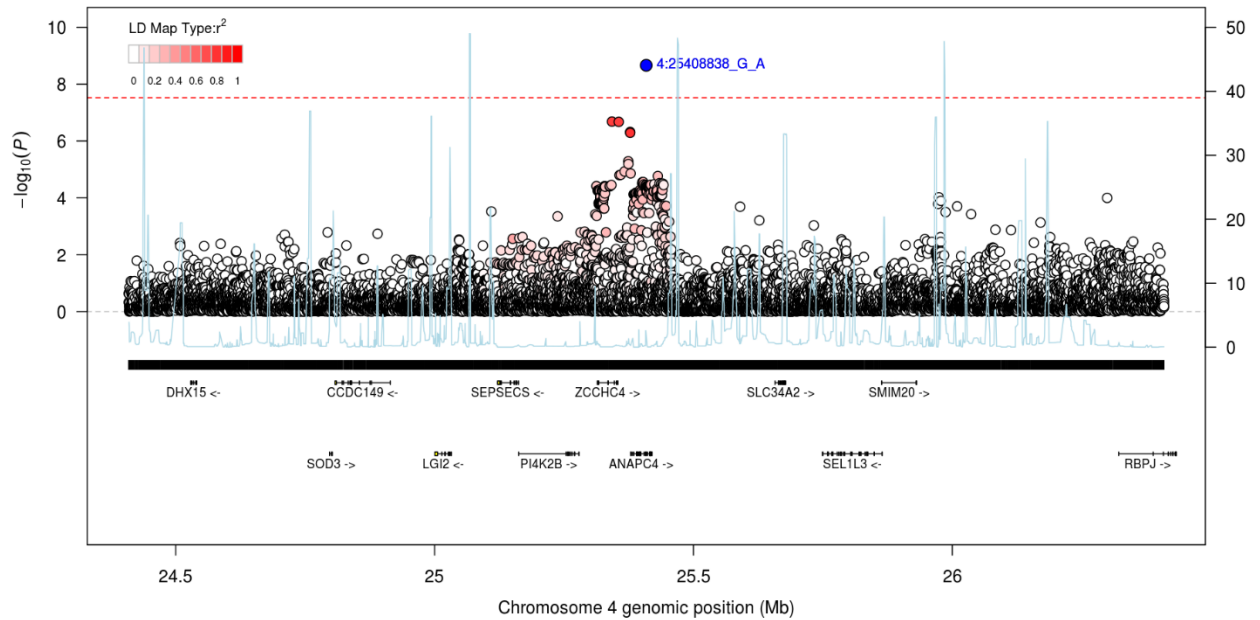



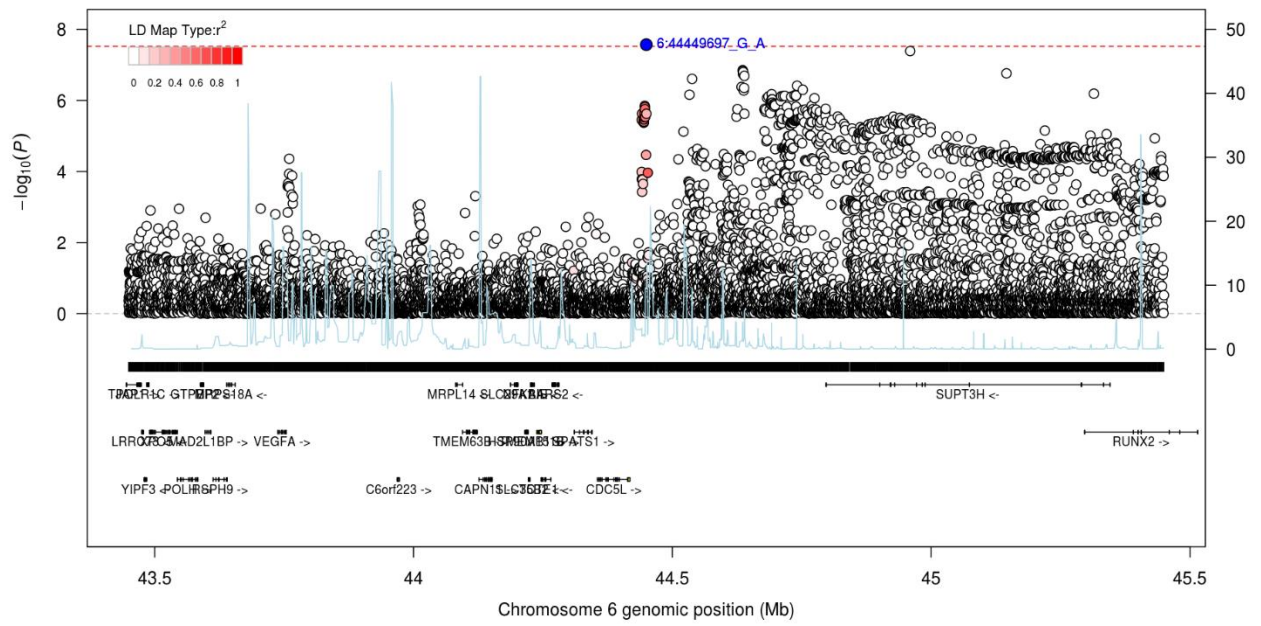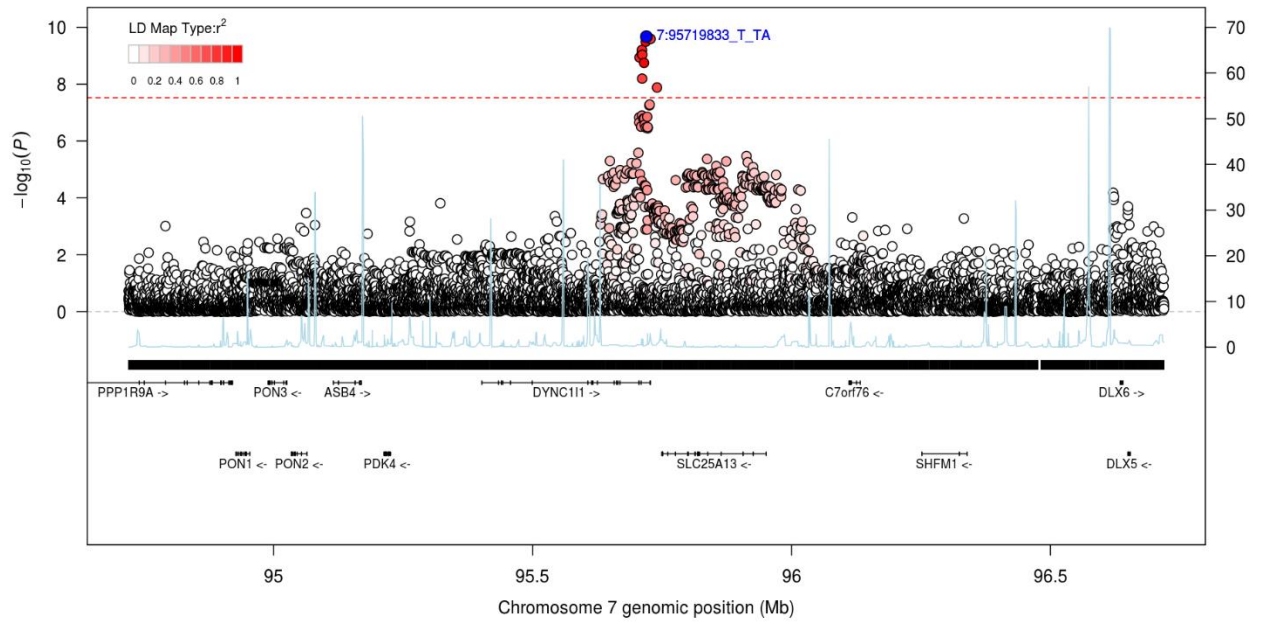

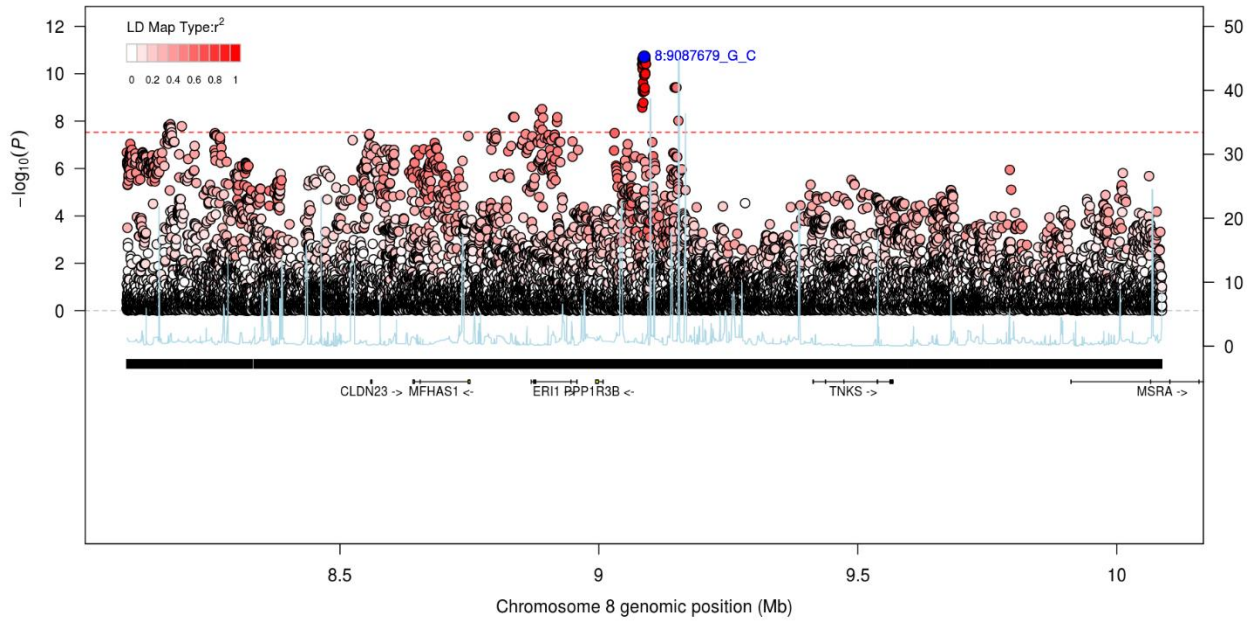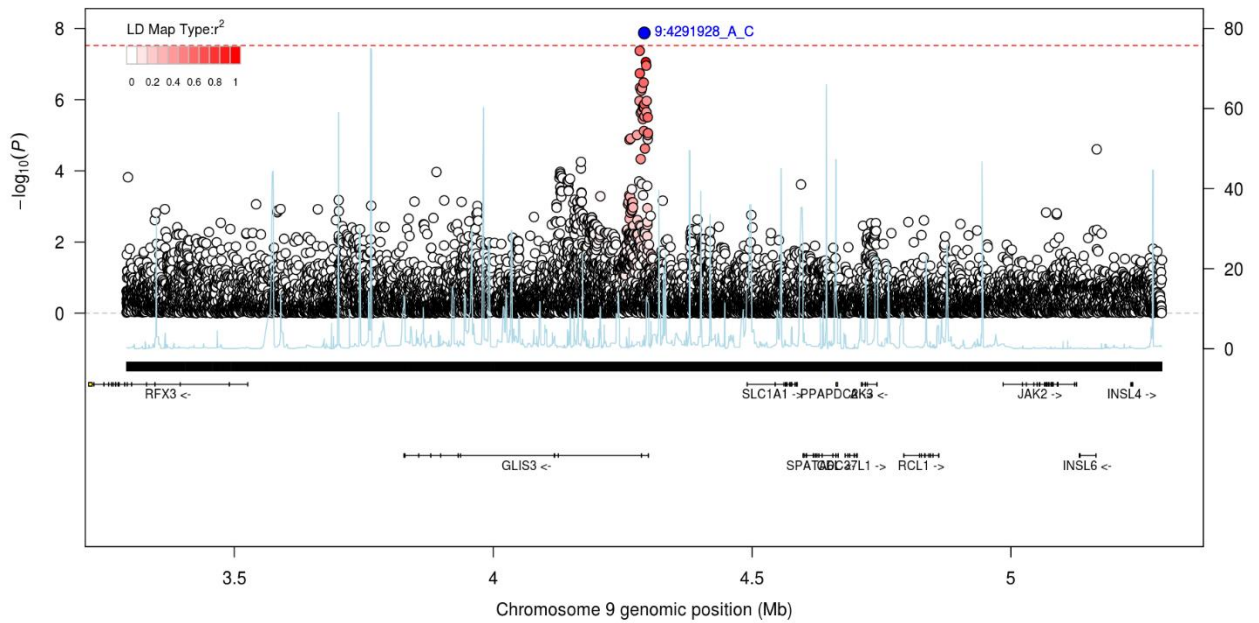

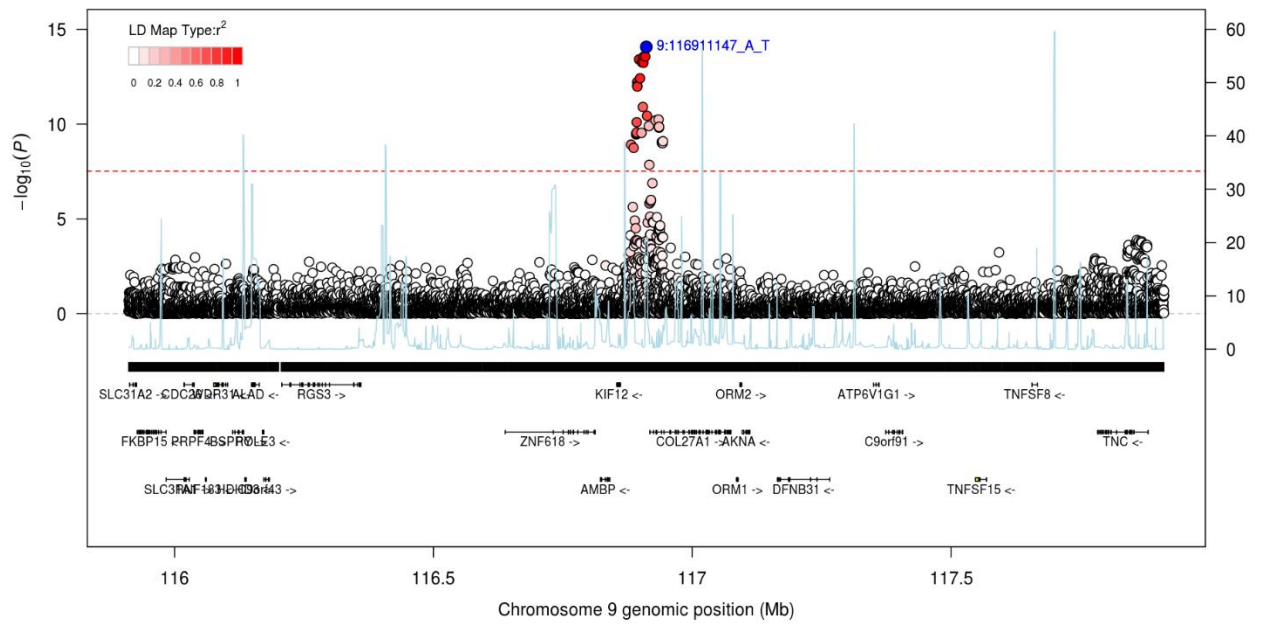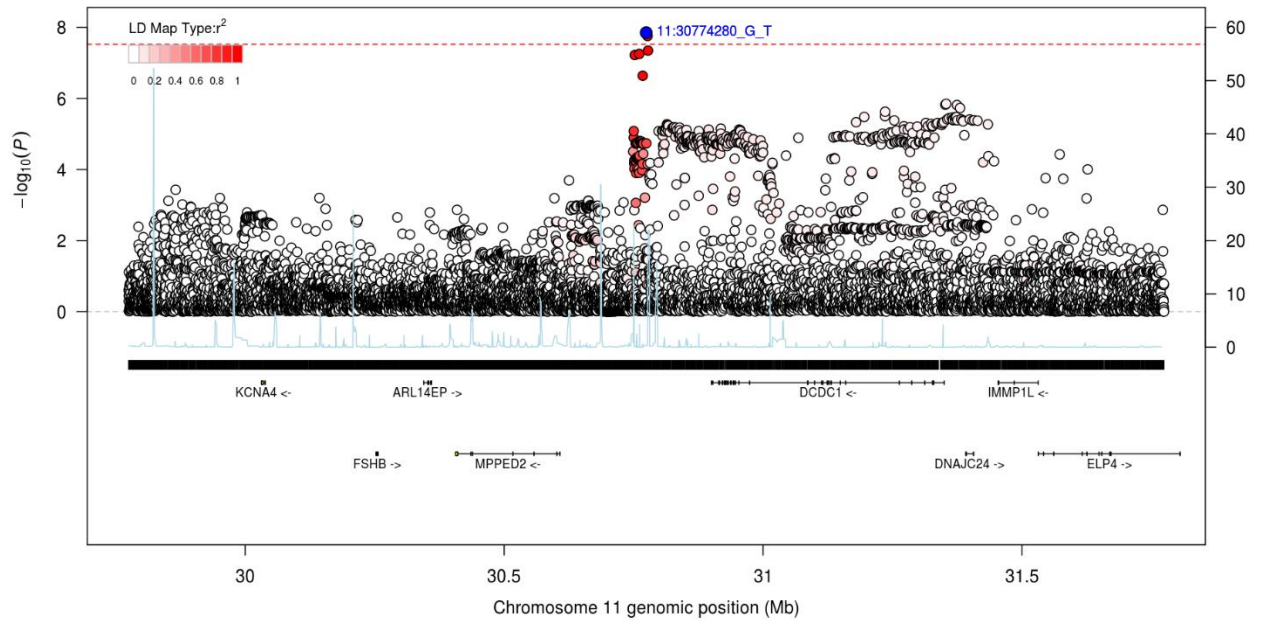

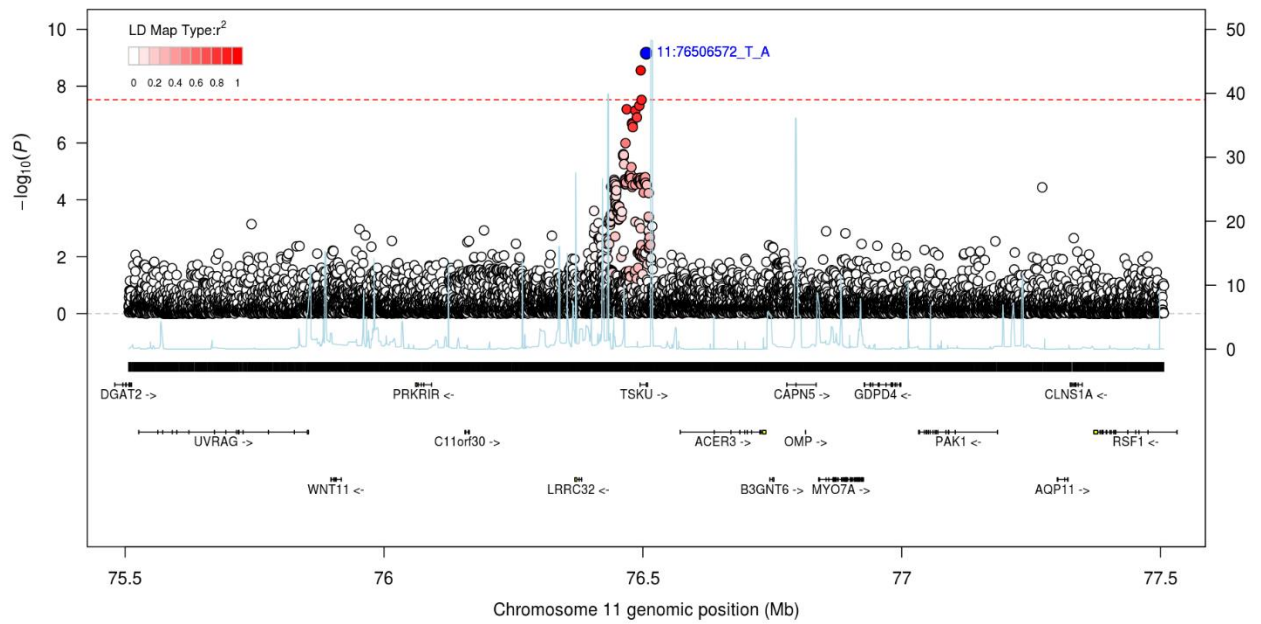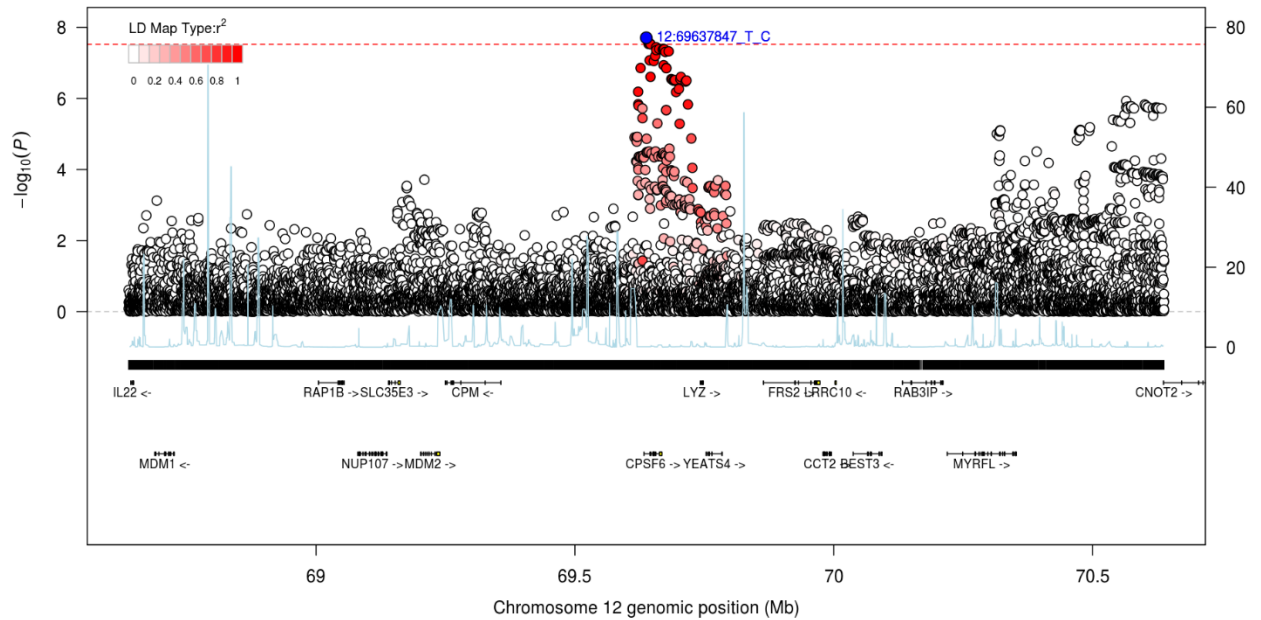

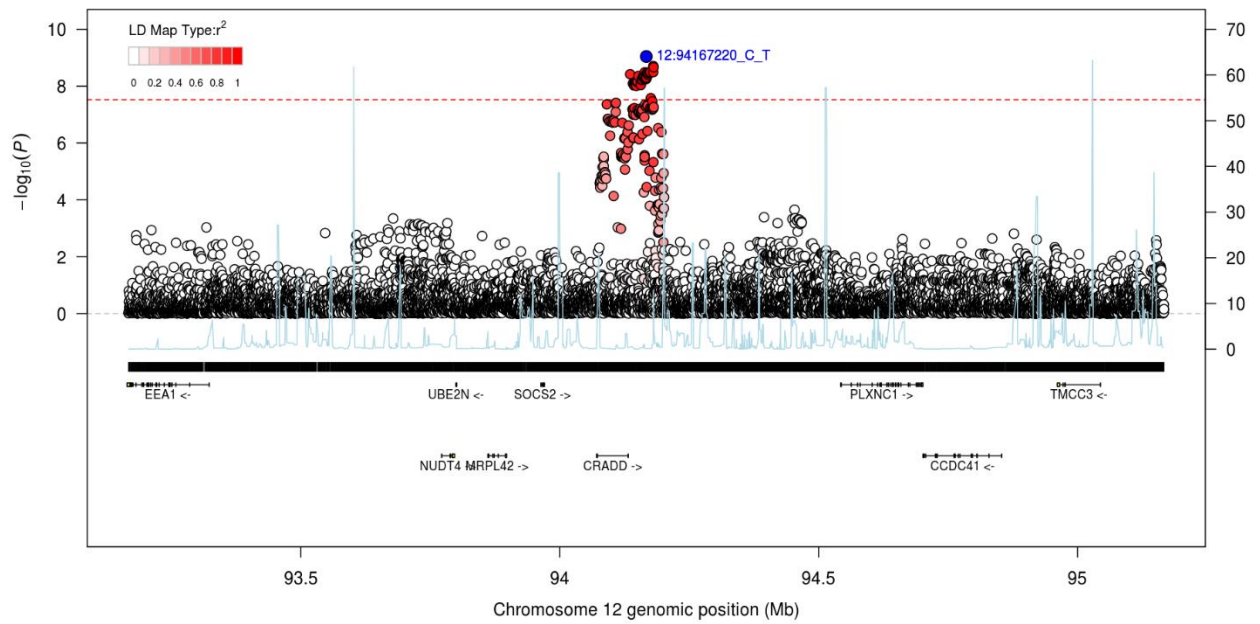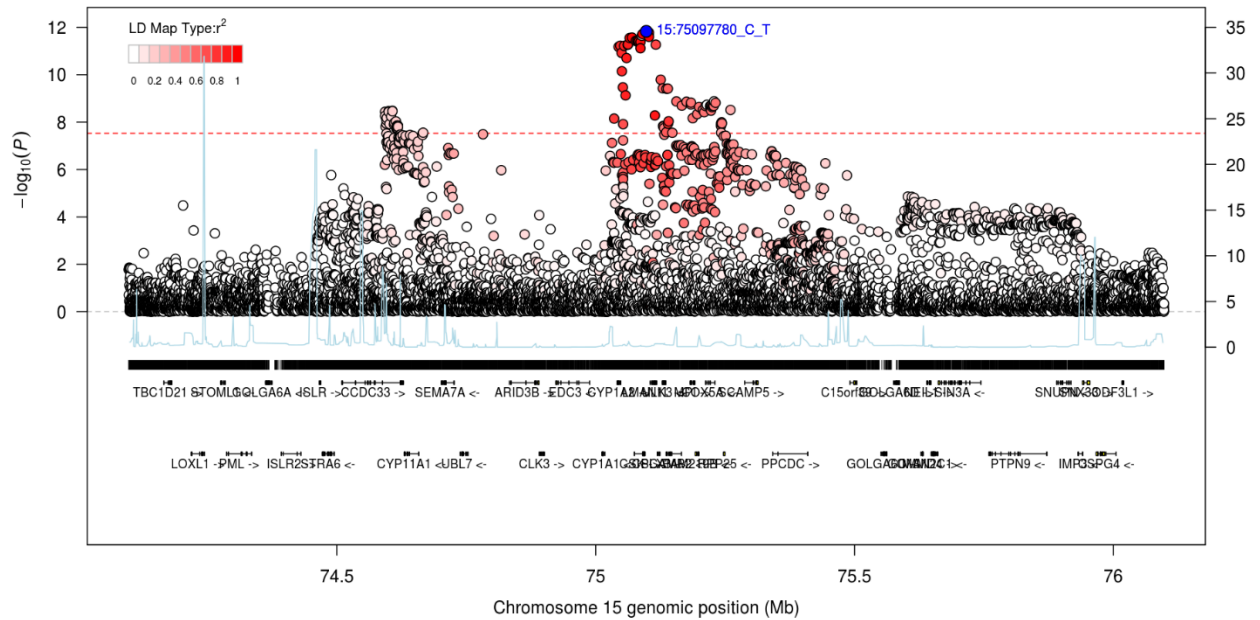



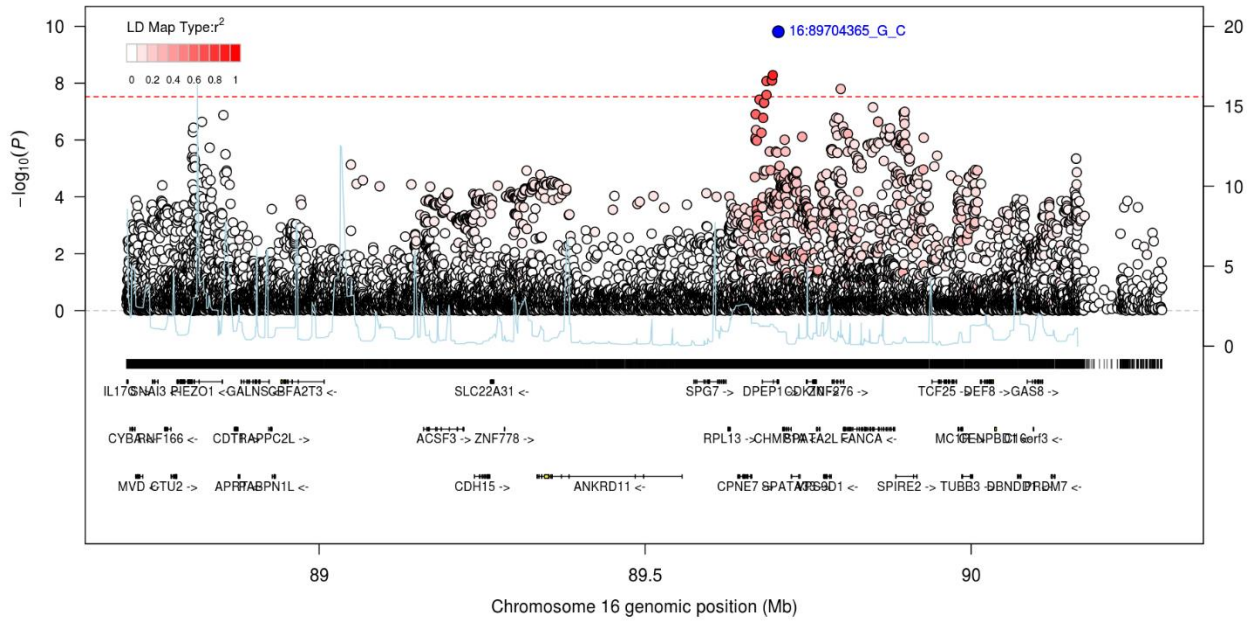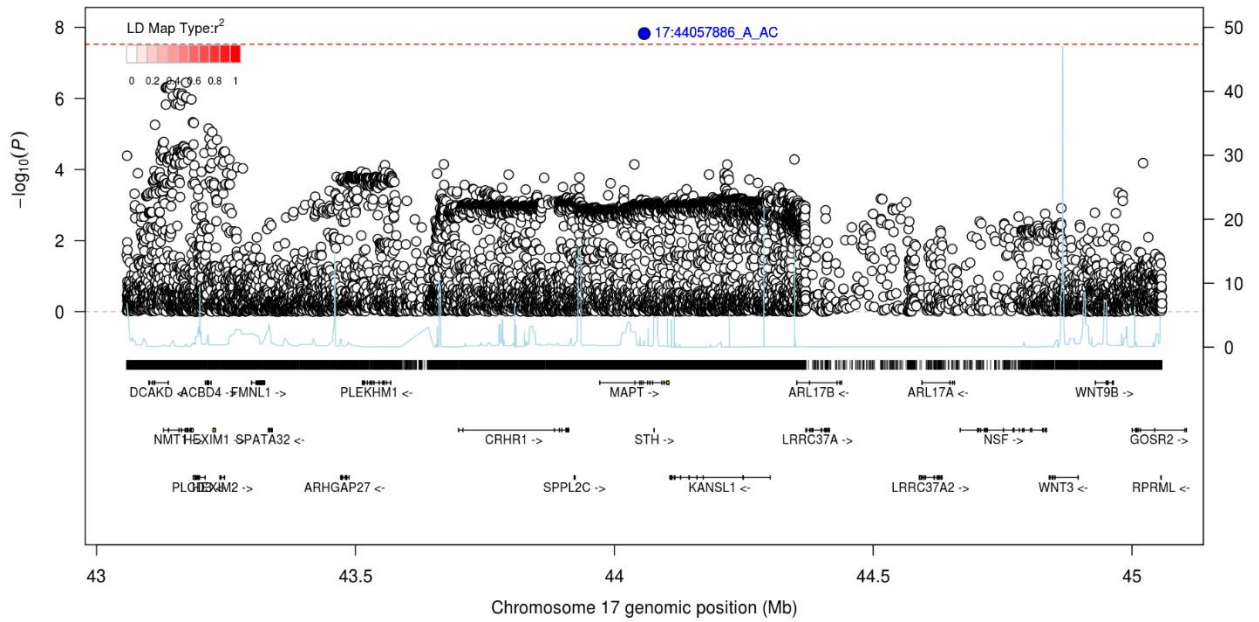

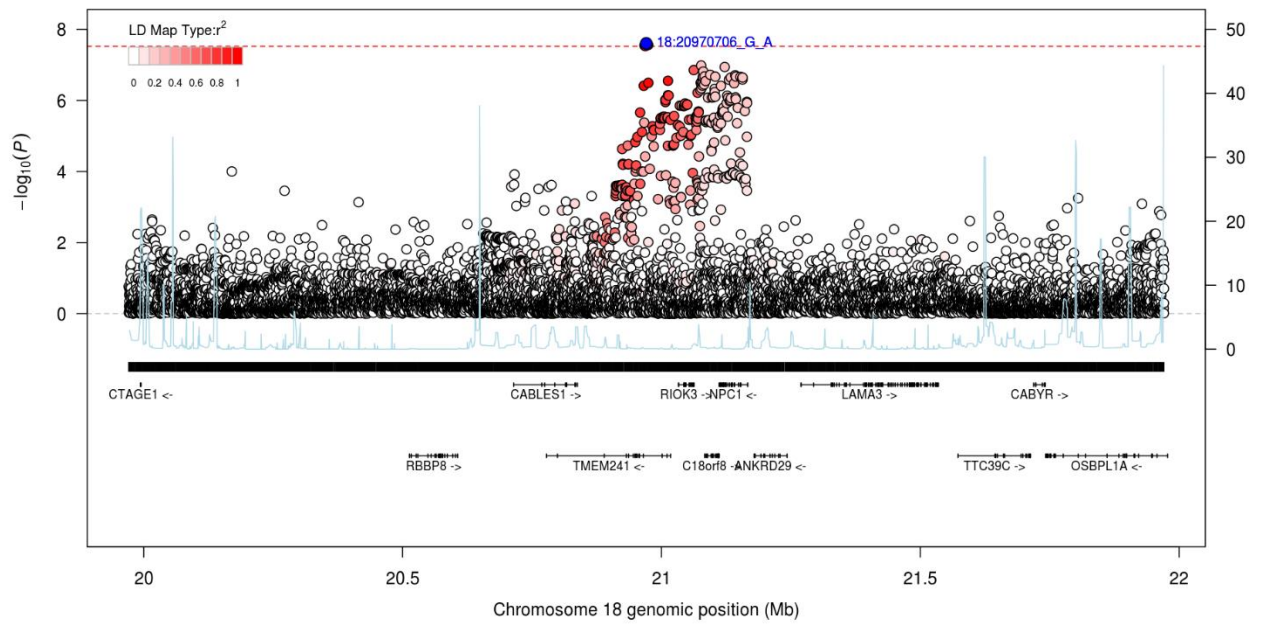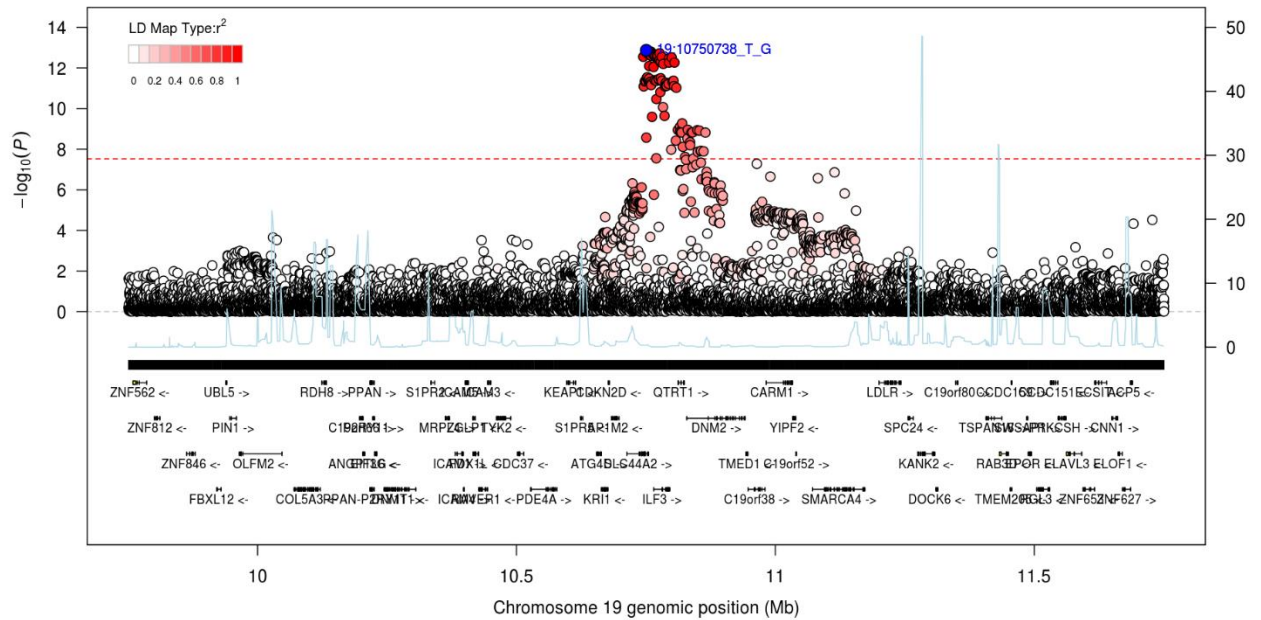

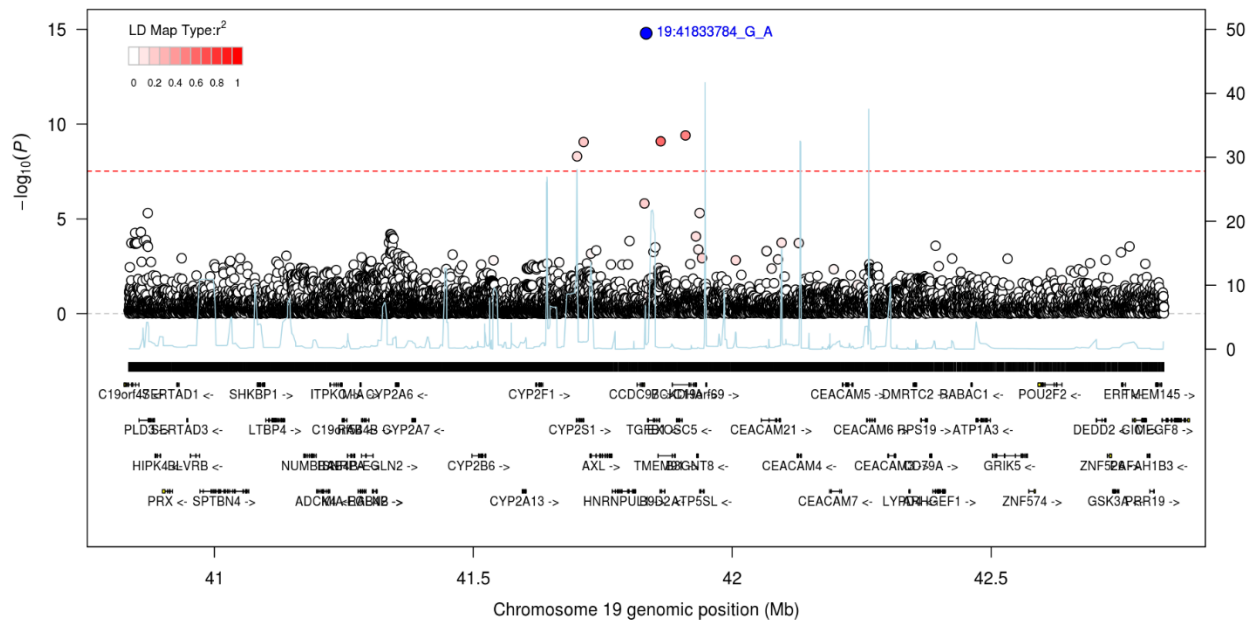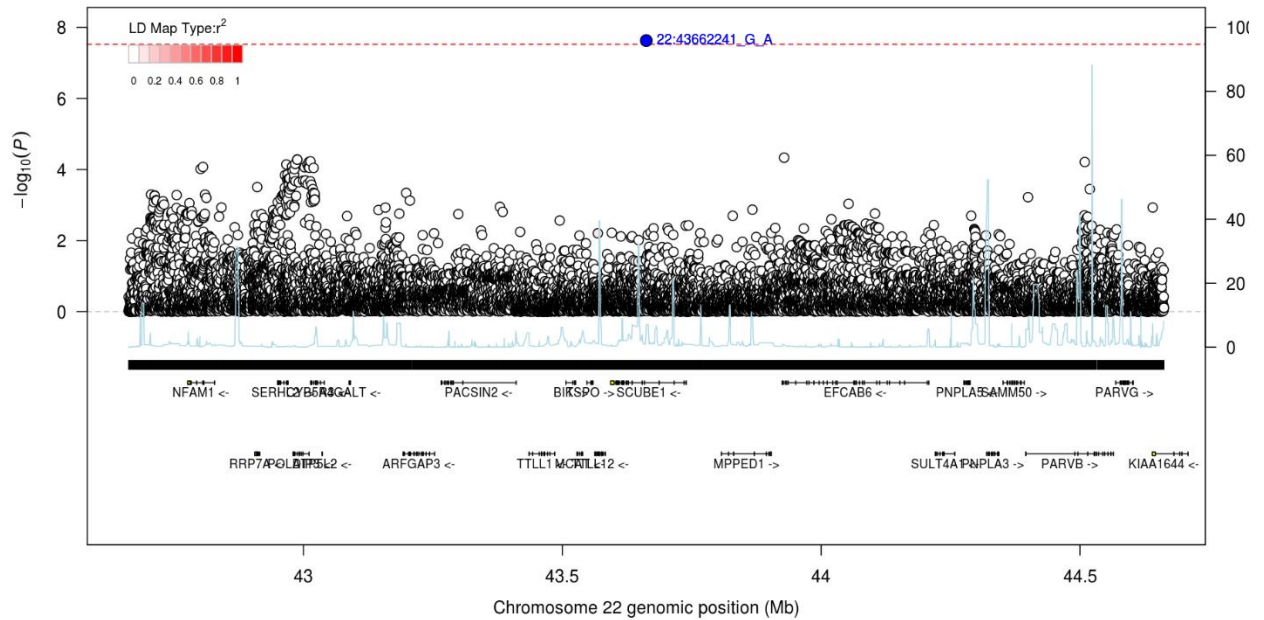

**Supplementary Figure 4: Locus zoom plots for 21 hip osteoarthritis loci that reached genome-wide significance in the meta-analysis (as reported in Table 1 and Supplementary Table 3), displaying 1Mb each side of the top variant, where the blue circle represents the index variant on the meta-analysis across UK Biobank and arcOGEN. LD is calculated from UK Biobank.**

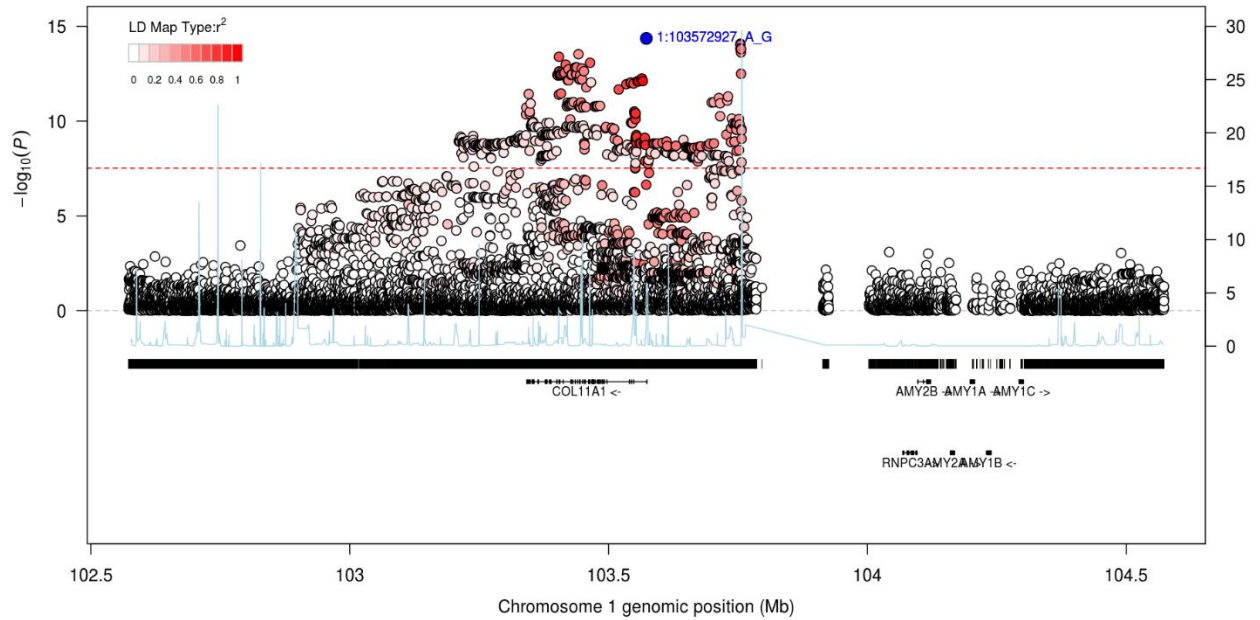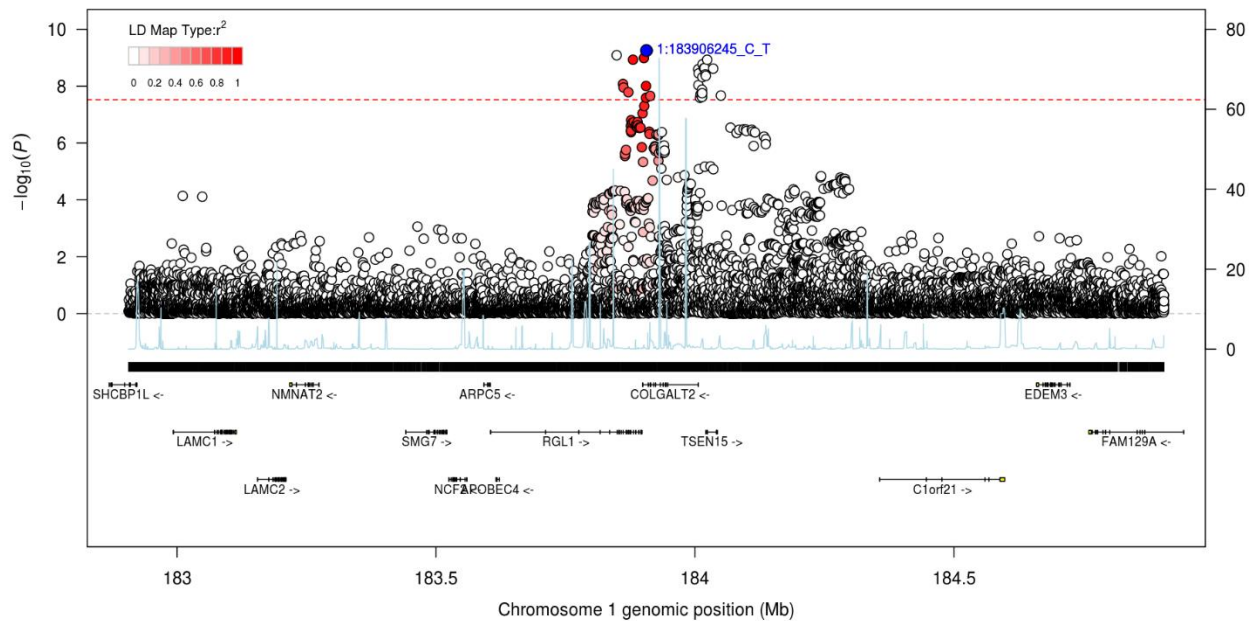

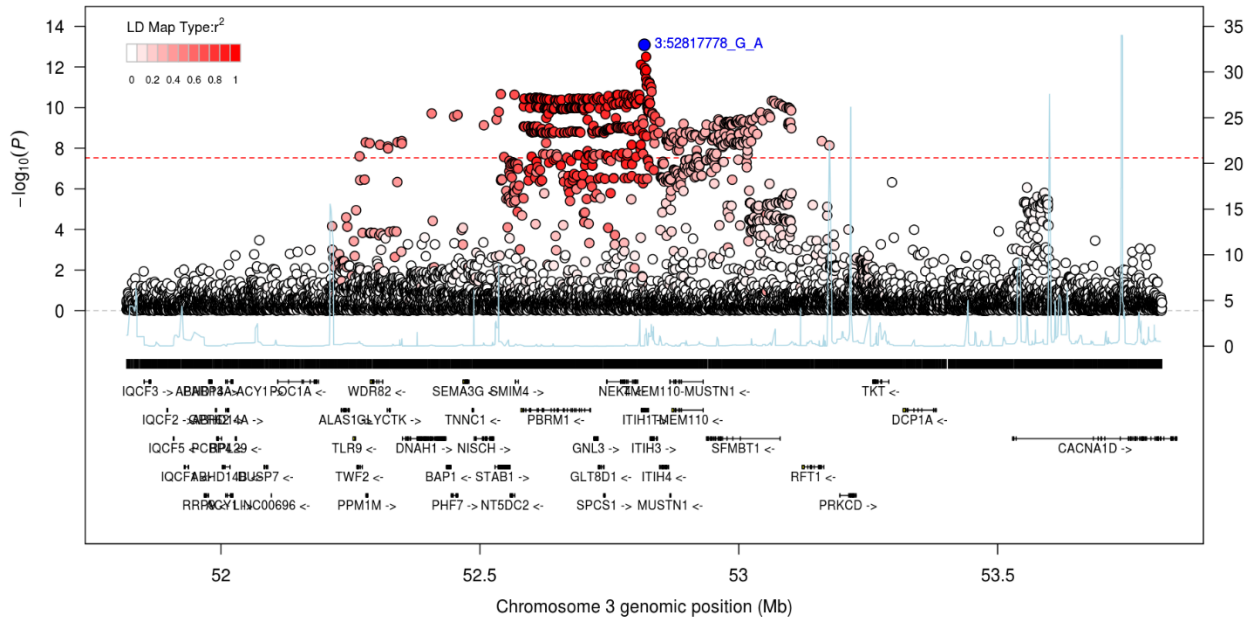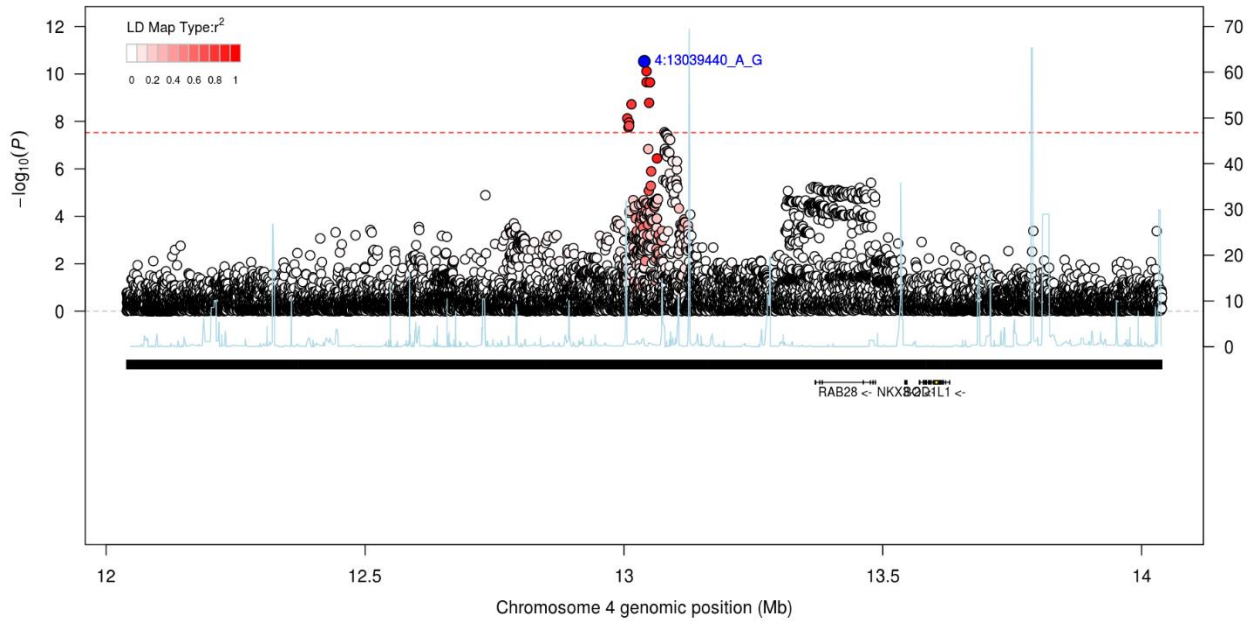

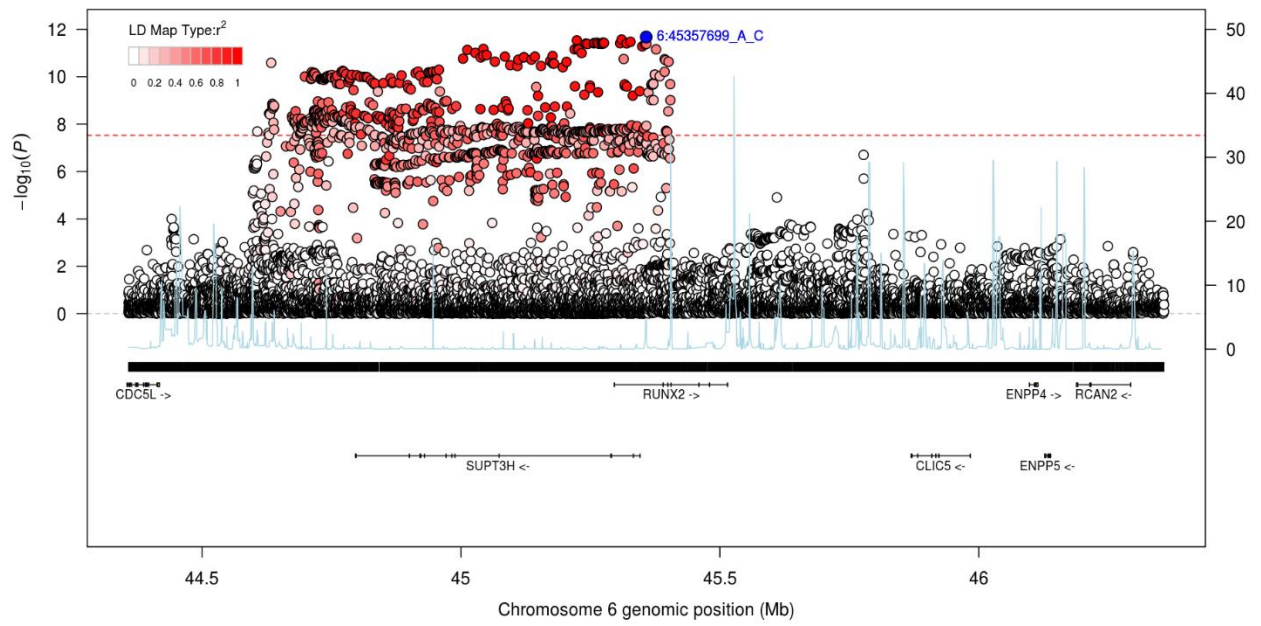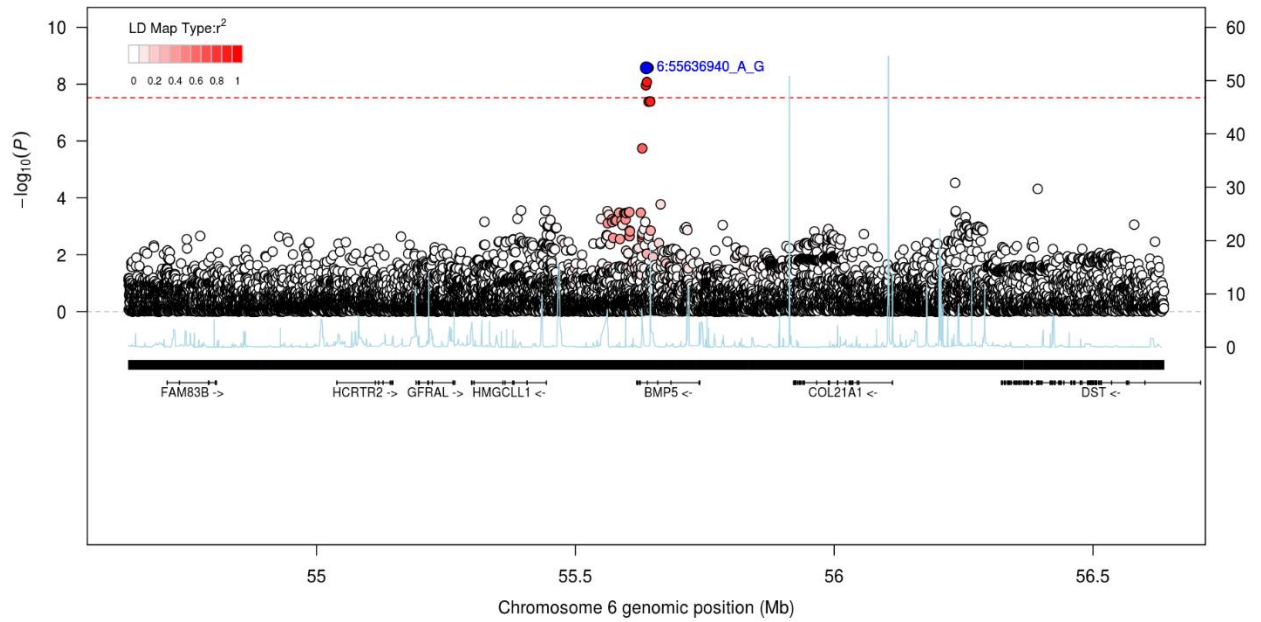

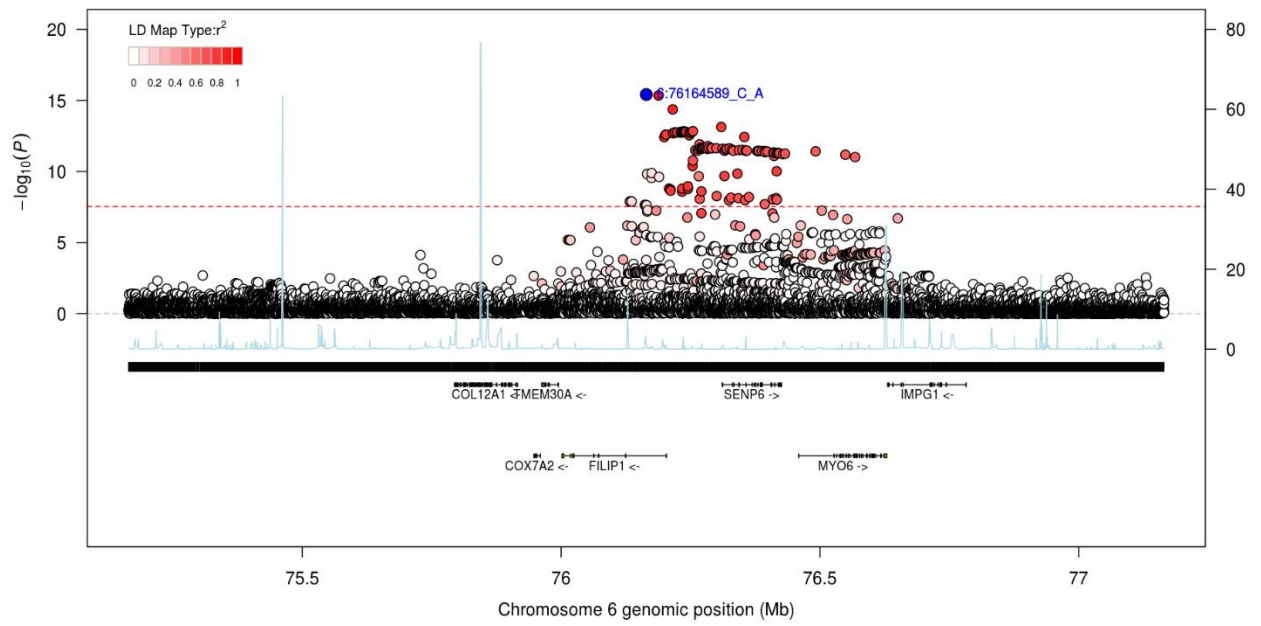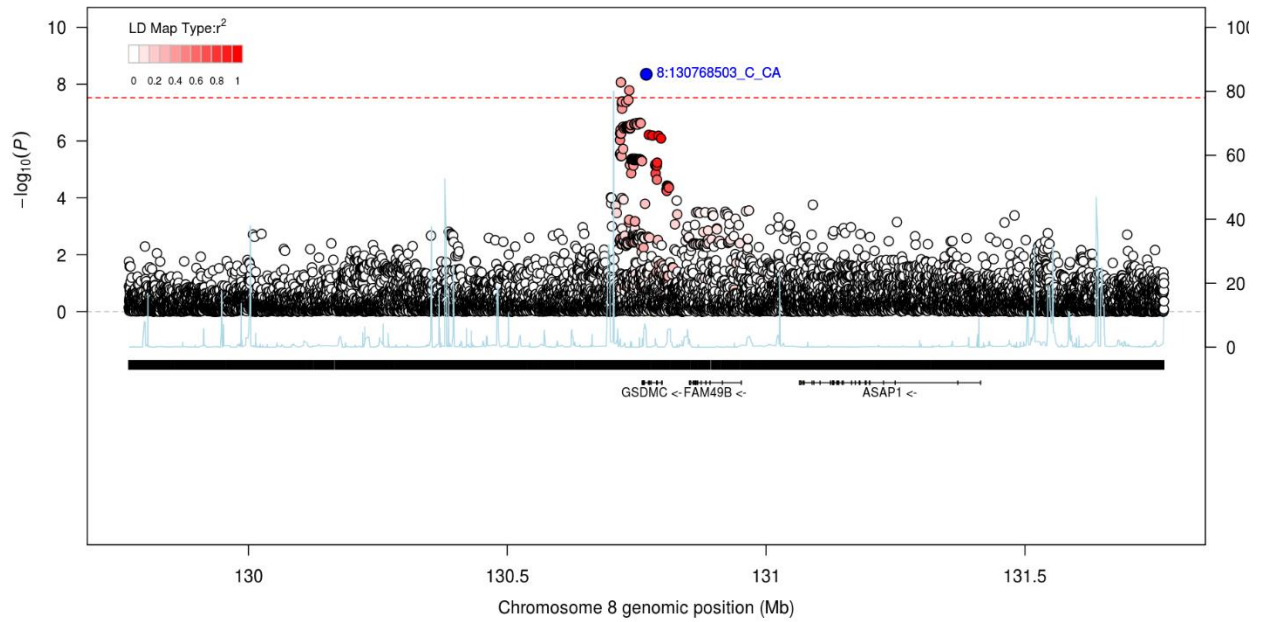

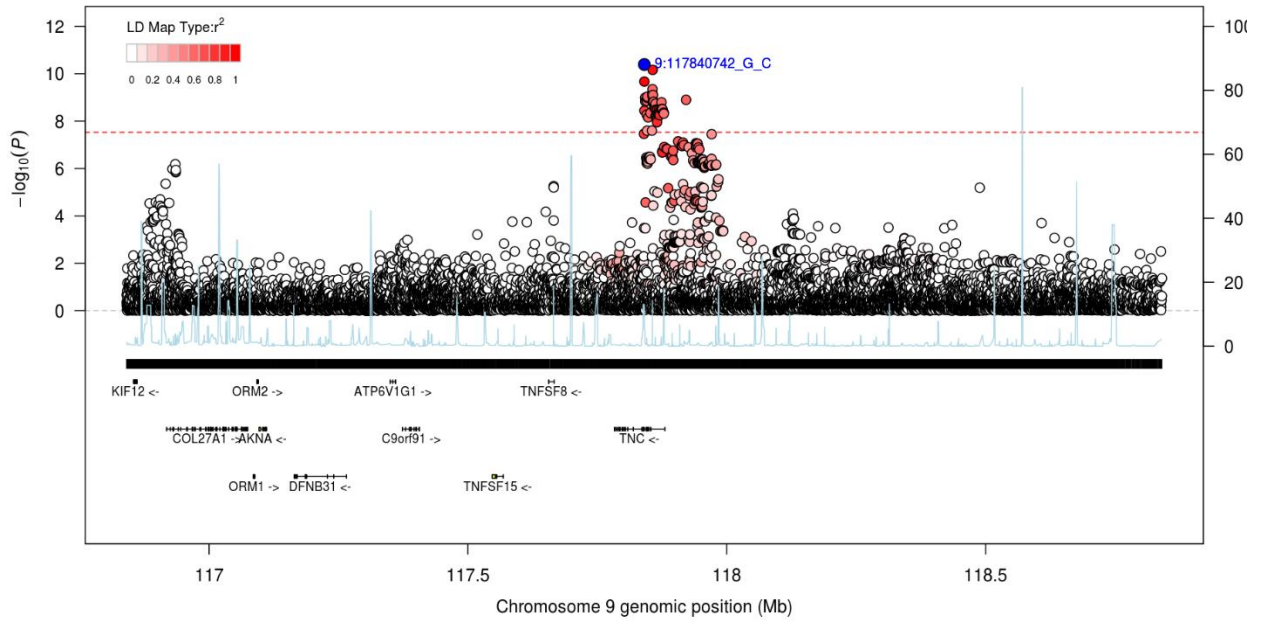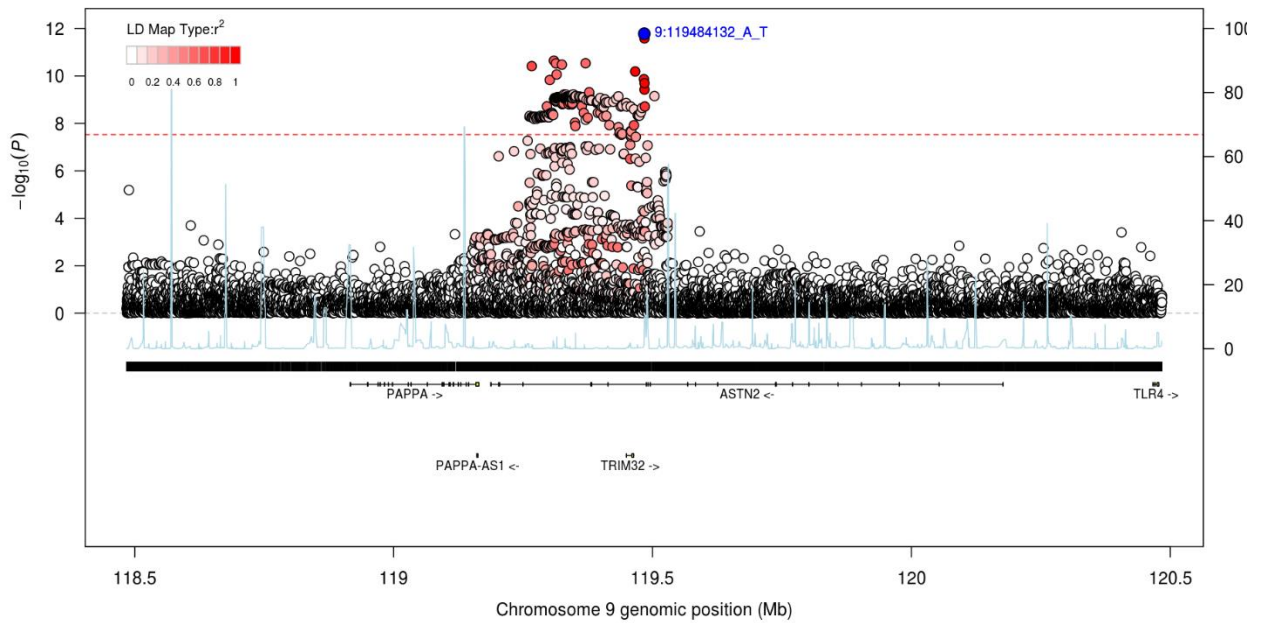



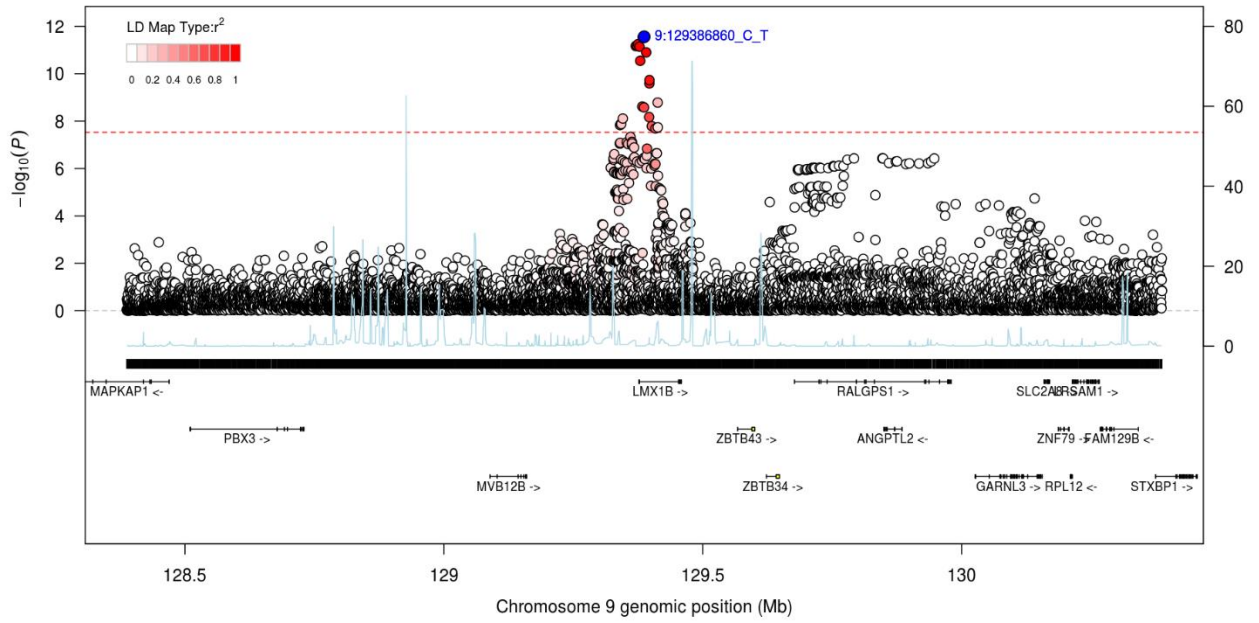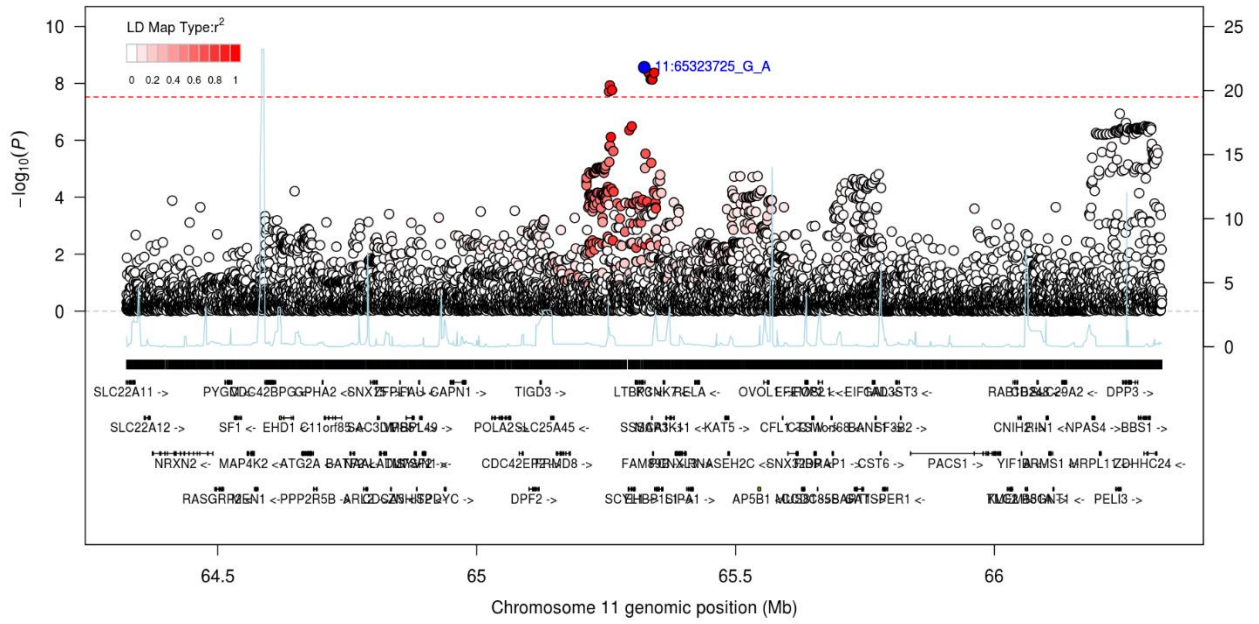

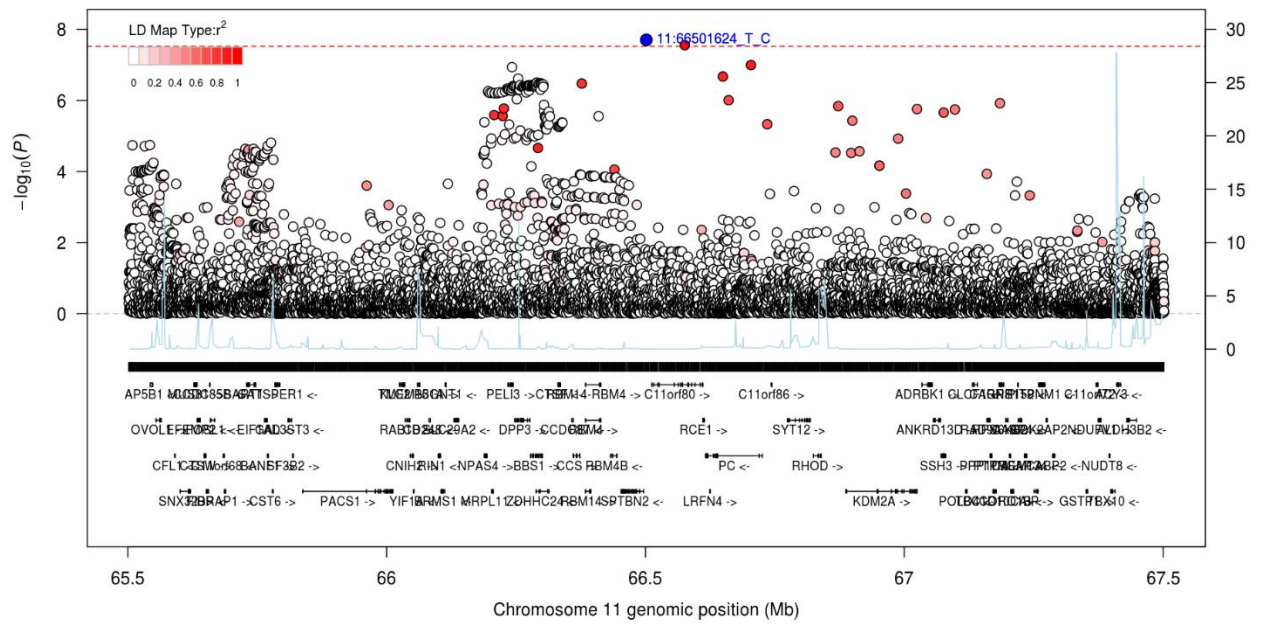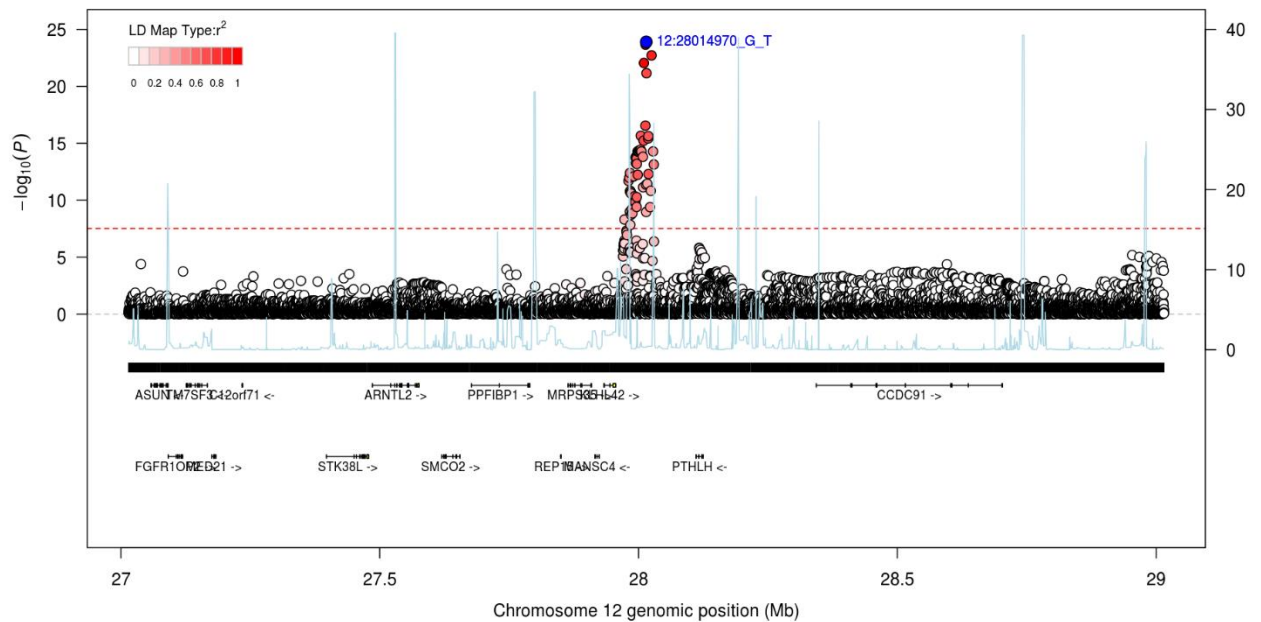

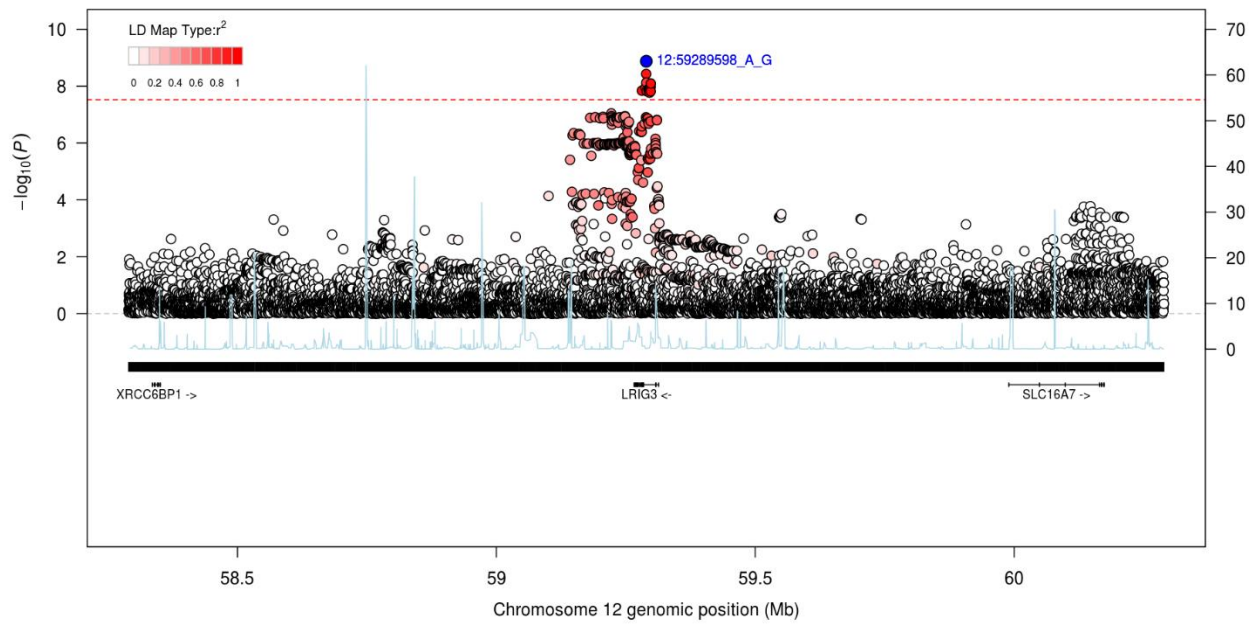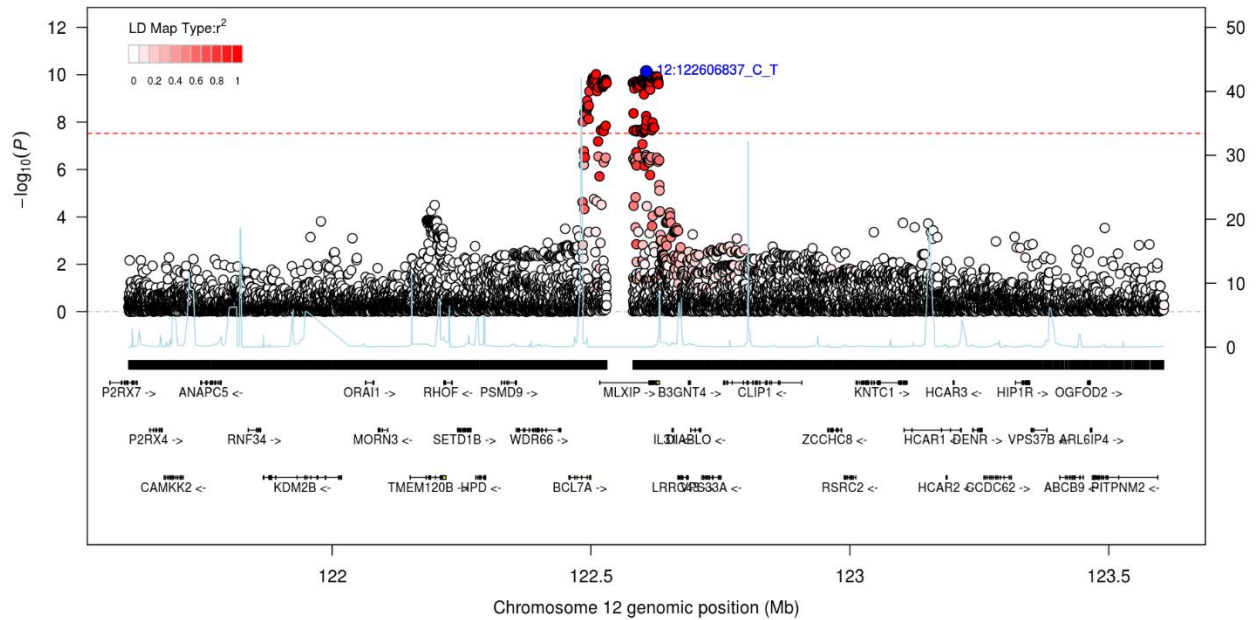

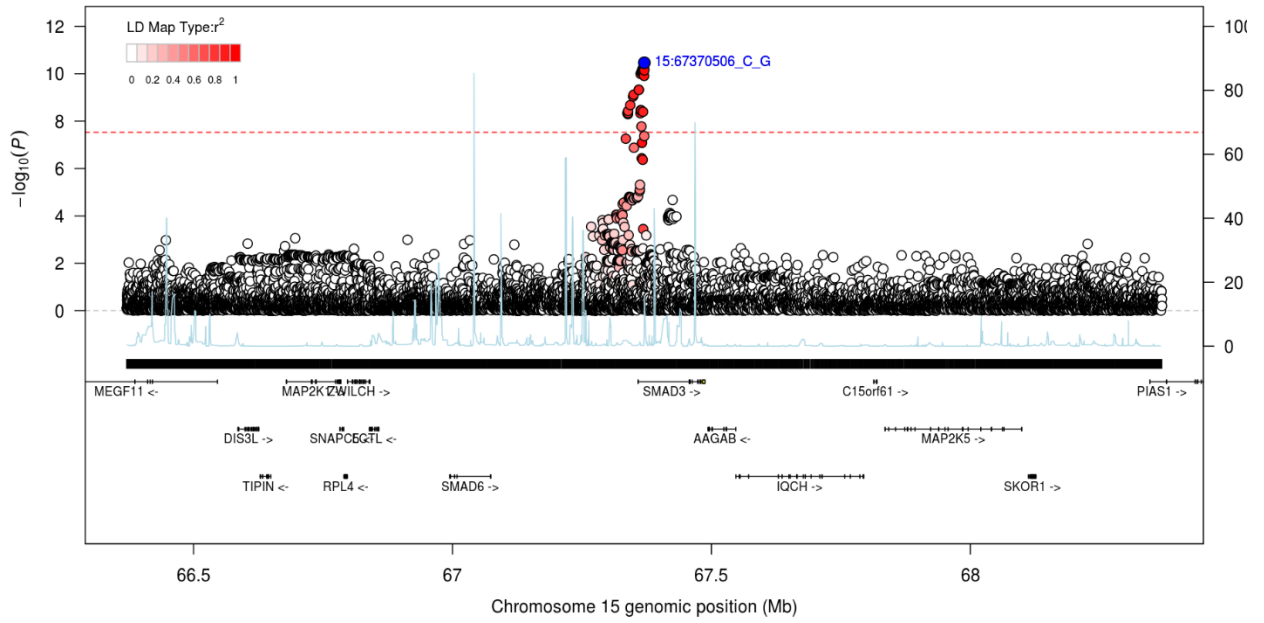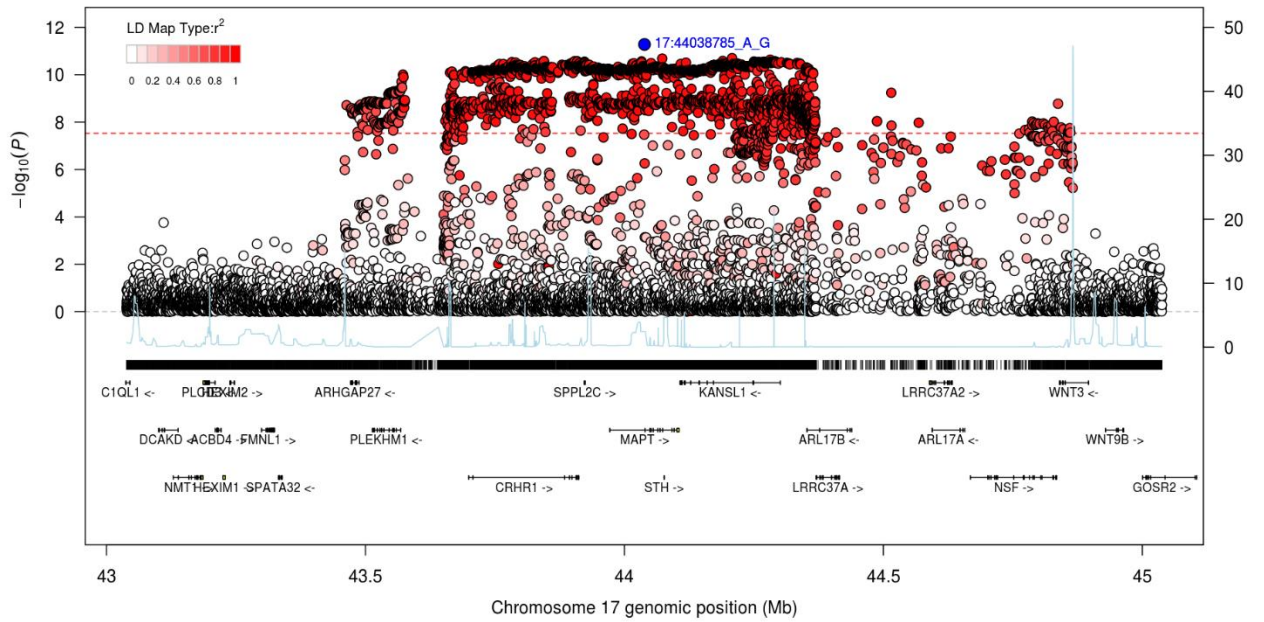

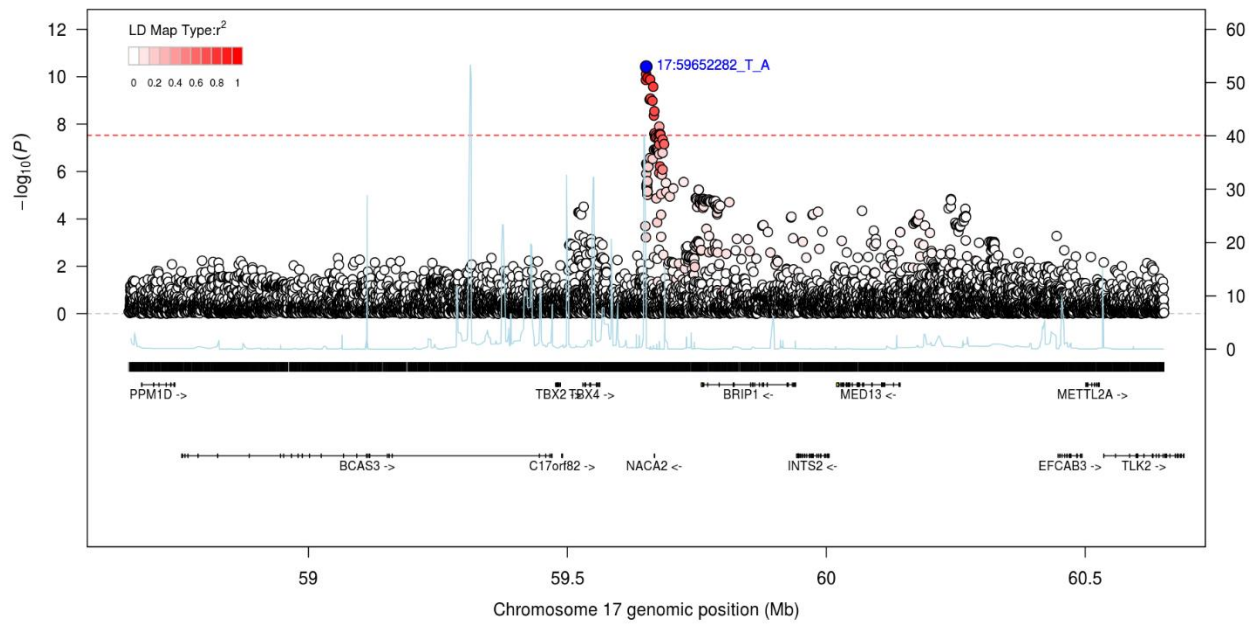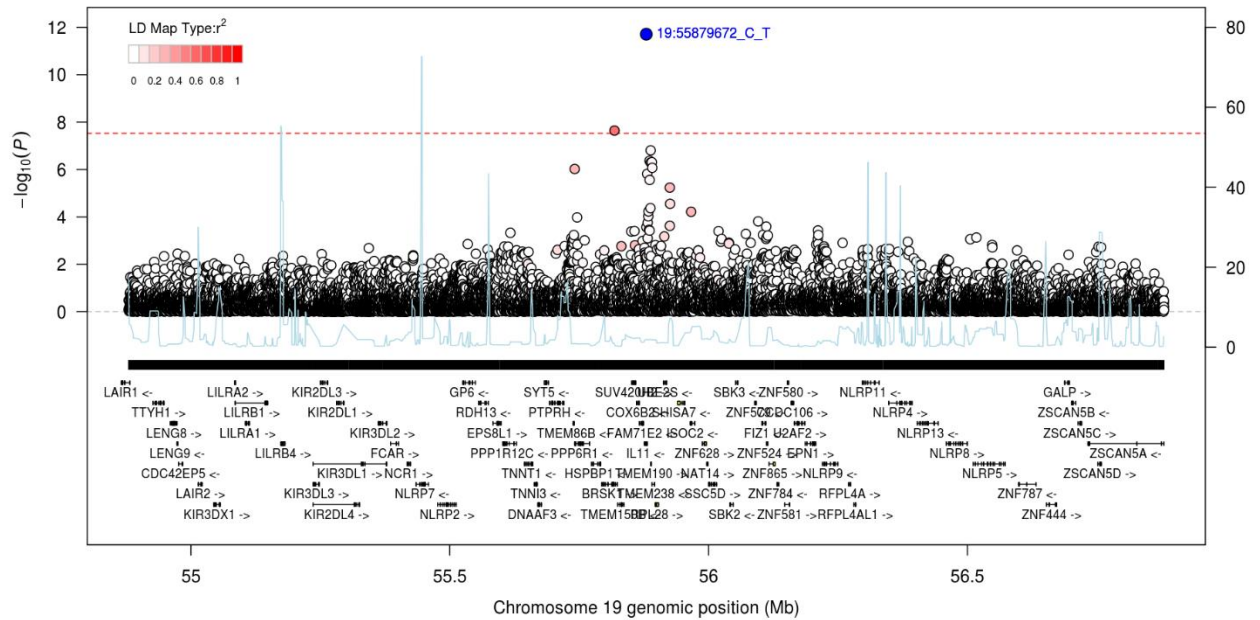

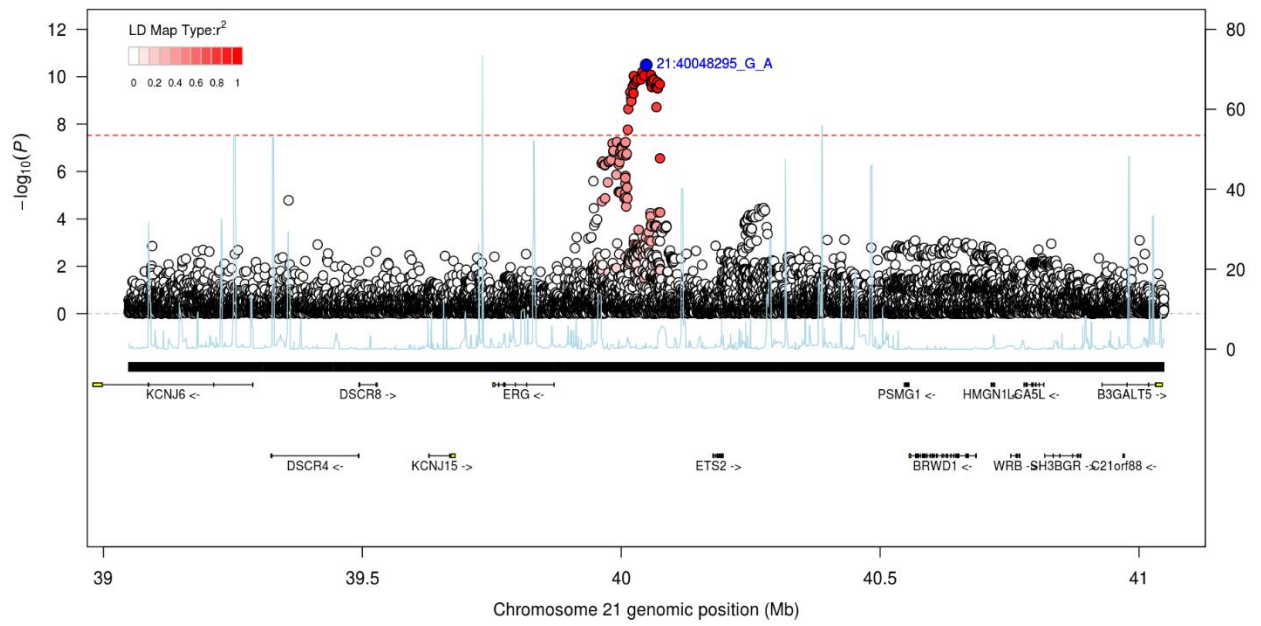

**Supplementary Figure 5: Locus zoom plots for 9 knee osteoarthritis loci that reached genome-wide significance in the meta-analysis (as reported in Table 1 and Supplementary Table 3), displaying 1Mb each side of the top variant, where the blue circle represents the index variant on the meta-analysis across UK Biobank and arcOGEN. LD is calculated from UK Biobank.**

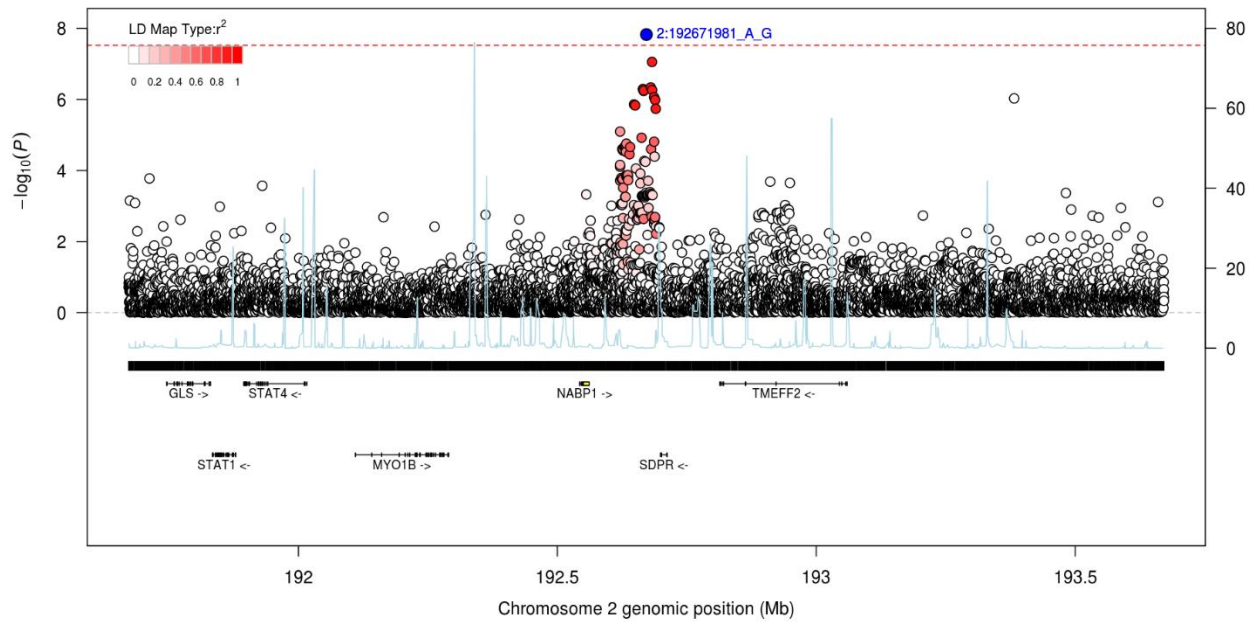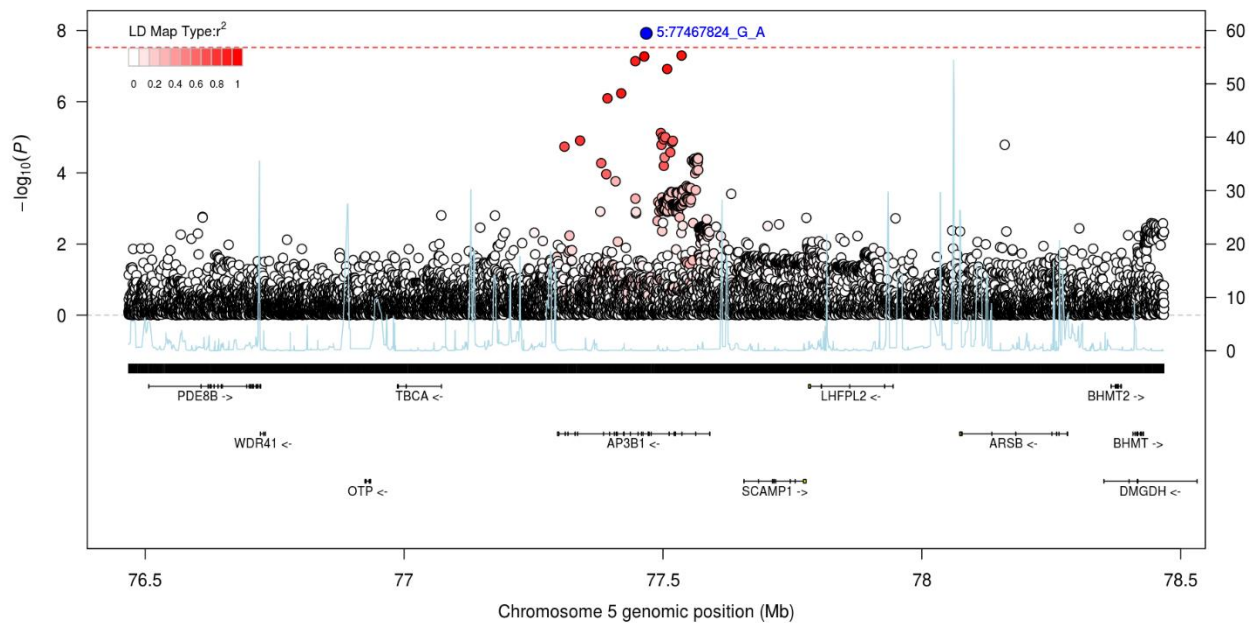

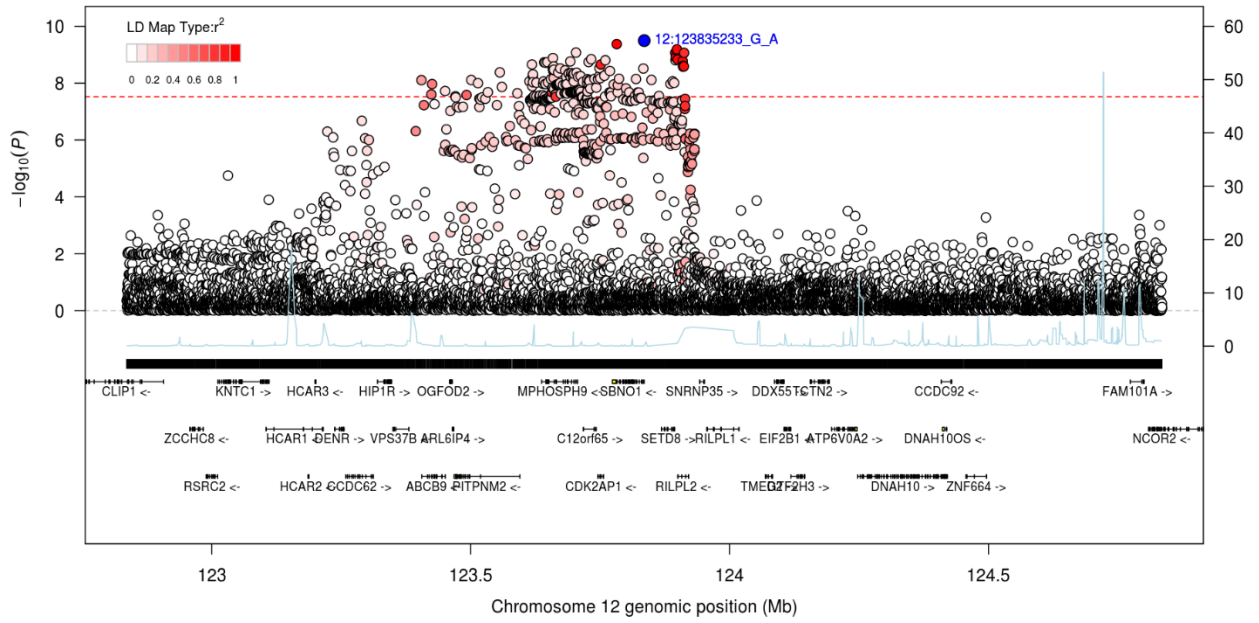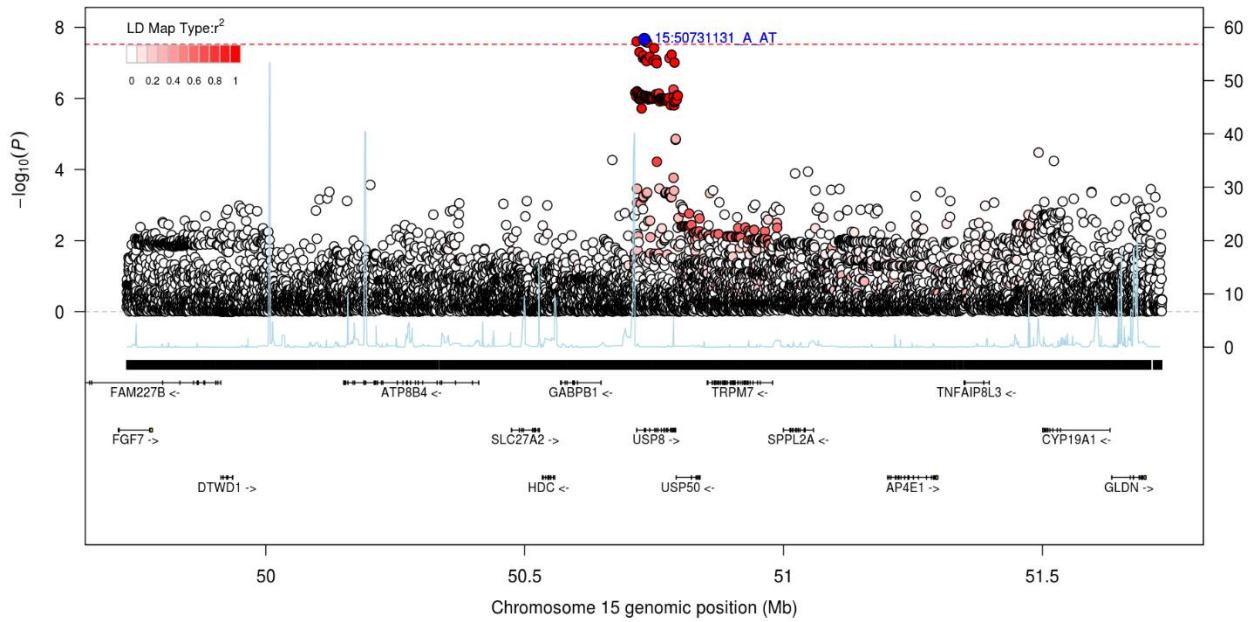



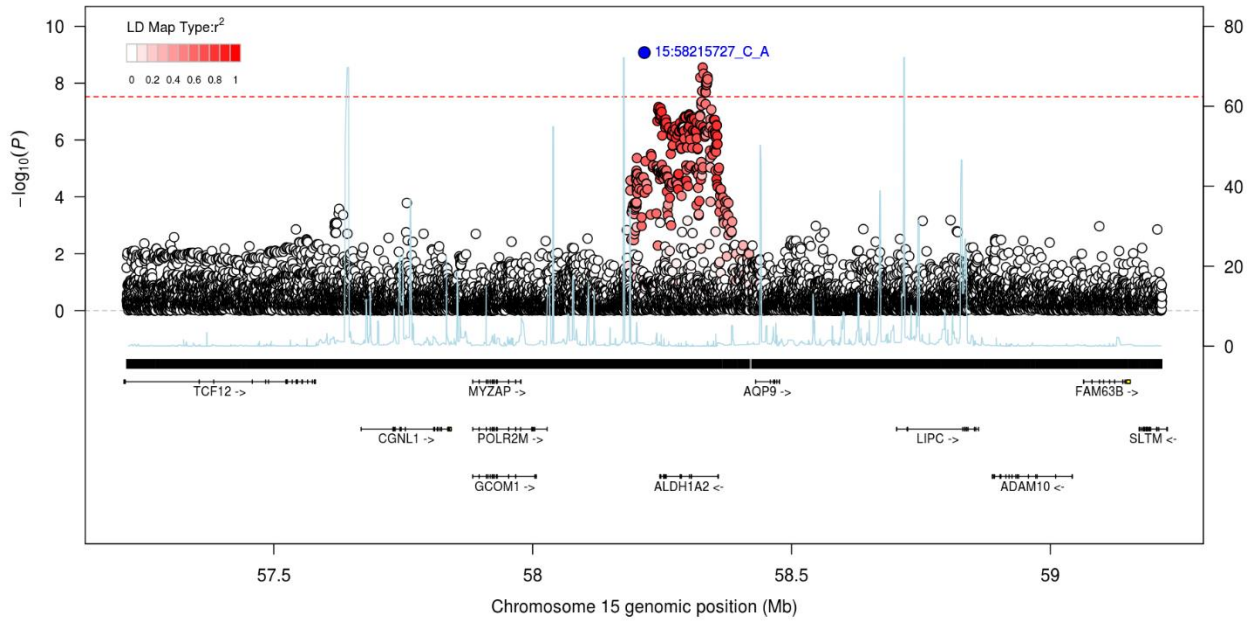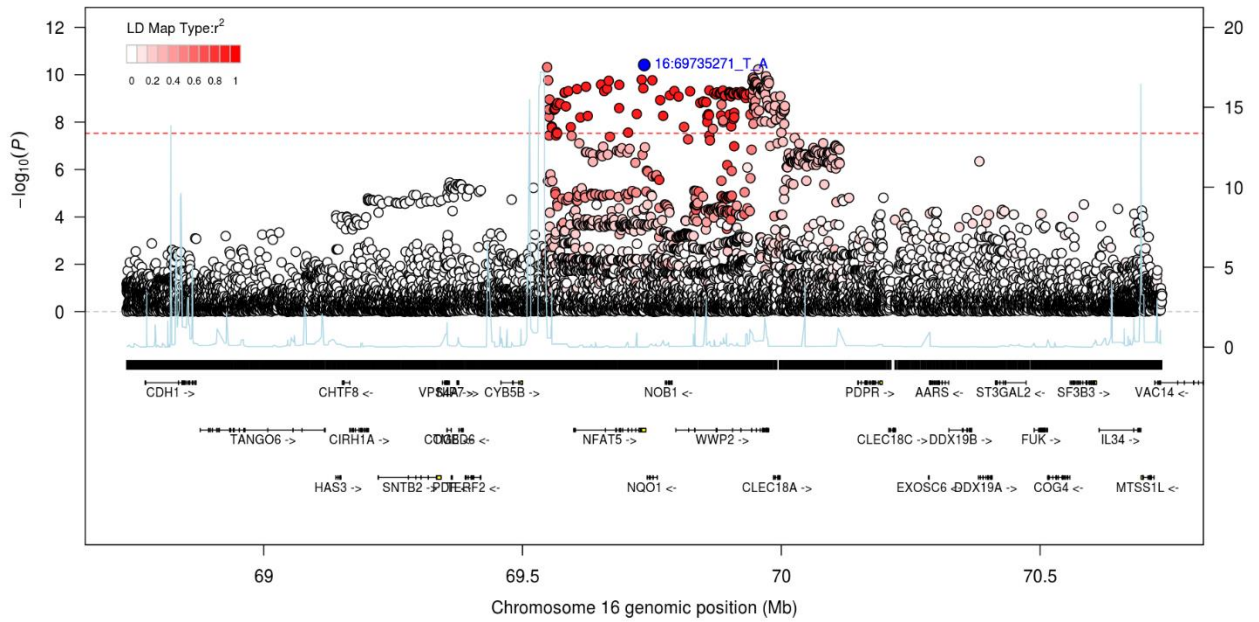

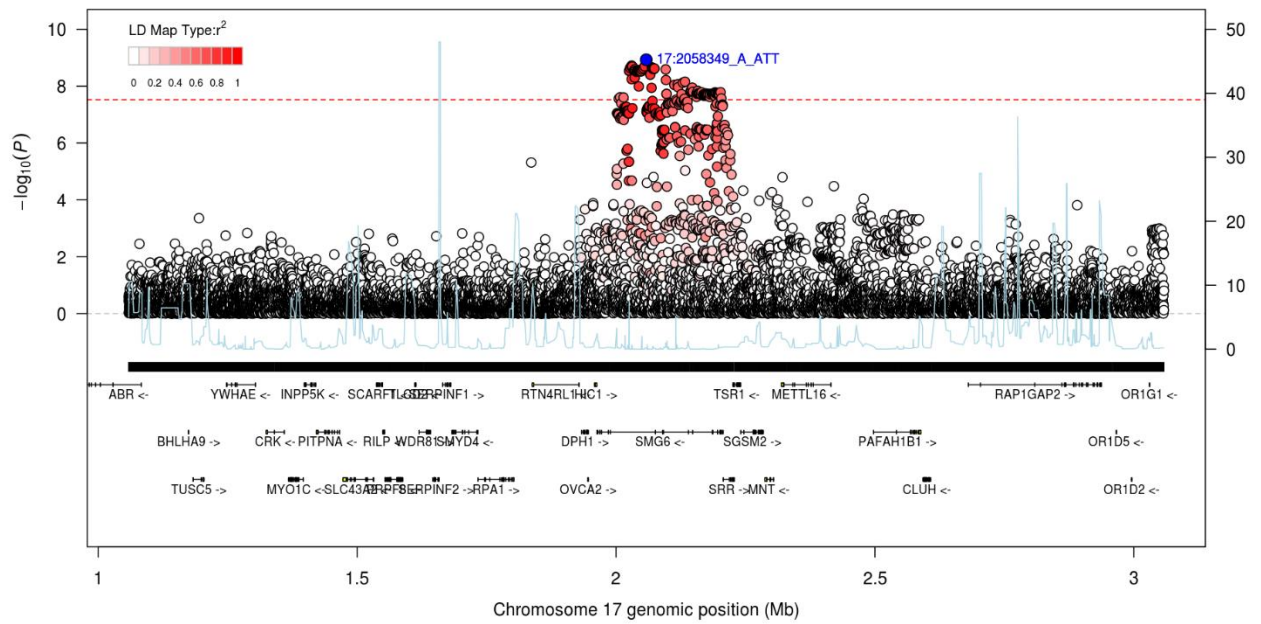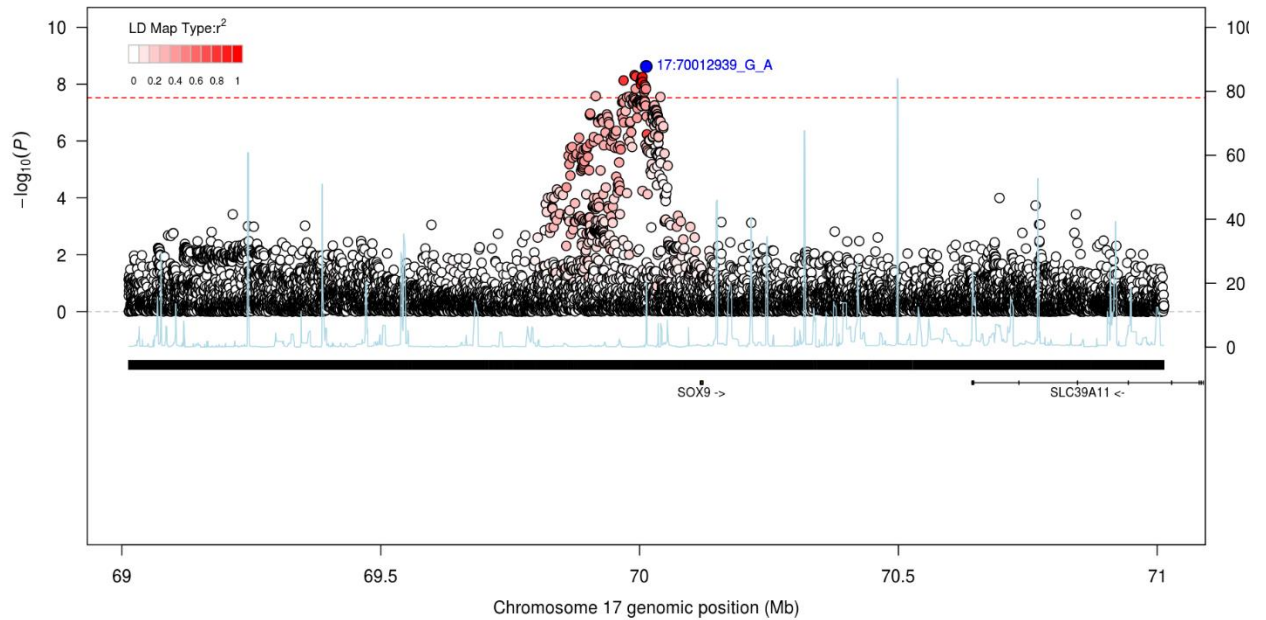

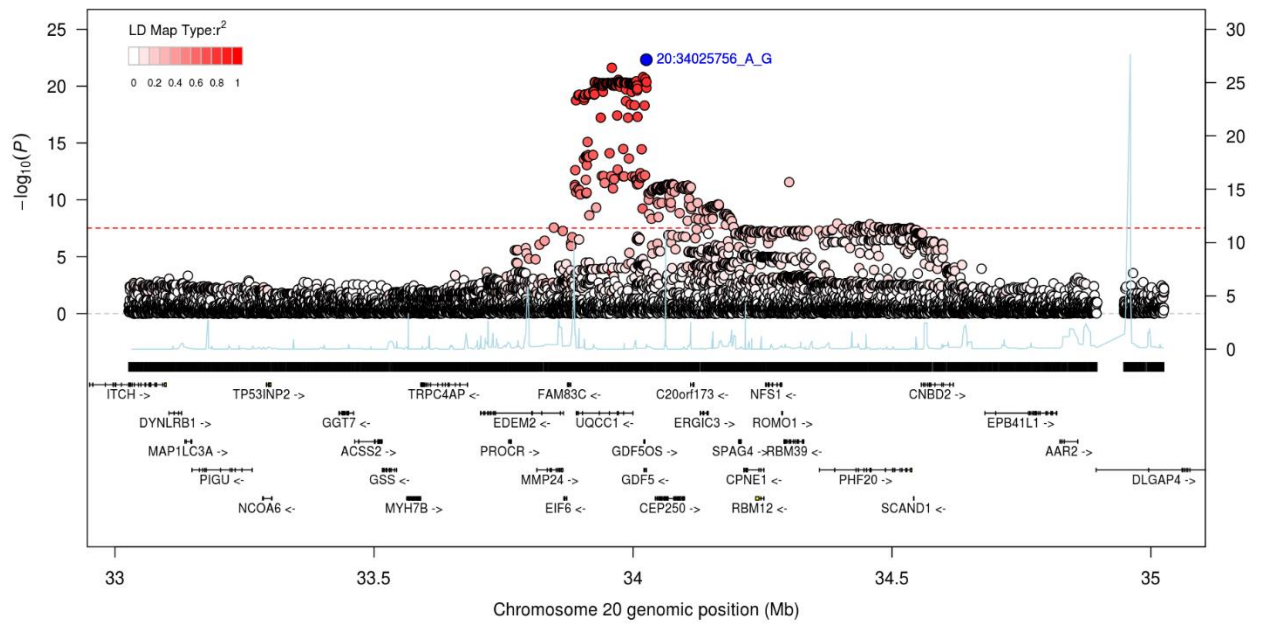

**Supplementary Figure 6: Locus zoom plots for 8 knee and/or hip osteoarthritis loci that reached genome-wide significance in the meta-analysis (as reported in Table 1 and Supplementary Table 3), displaying 1Mb each side of the top variant, where the blue circle represents the index variant on the meta-analysis across UK Biobank and arcOGEN. LD is calculated from UK Biobank.**

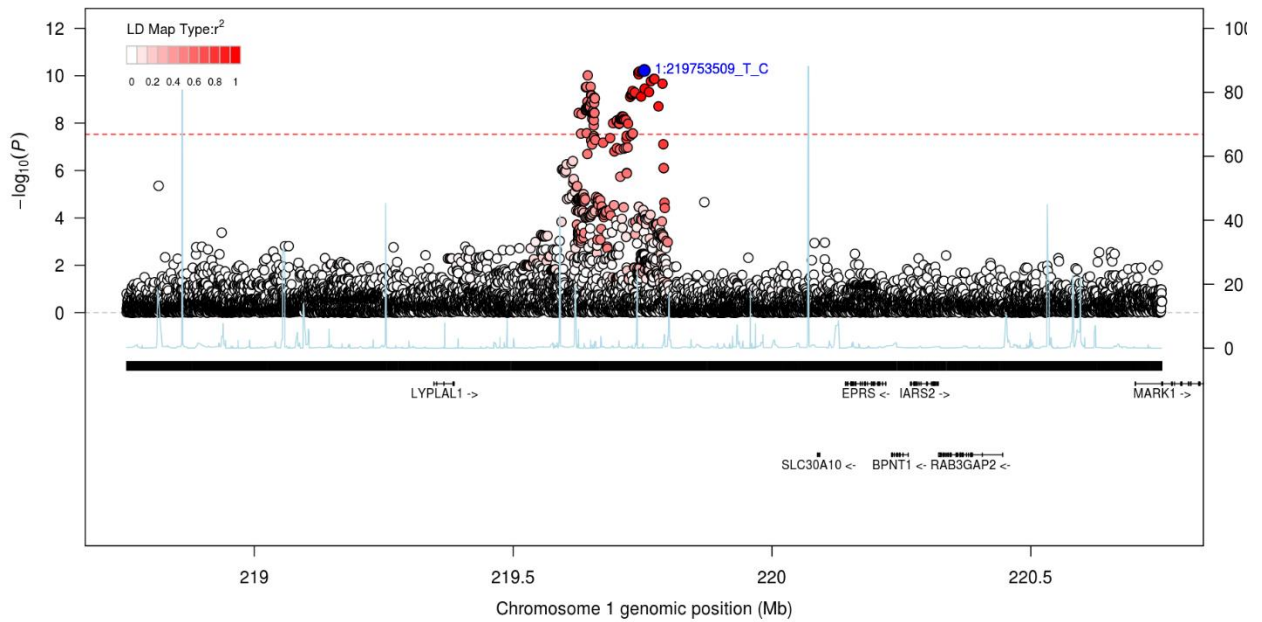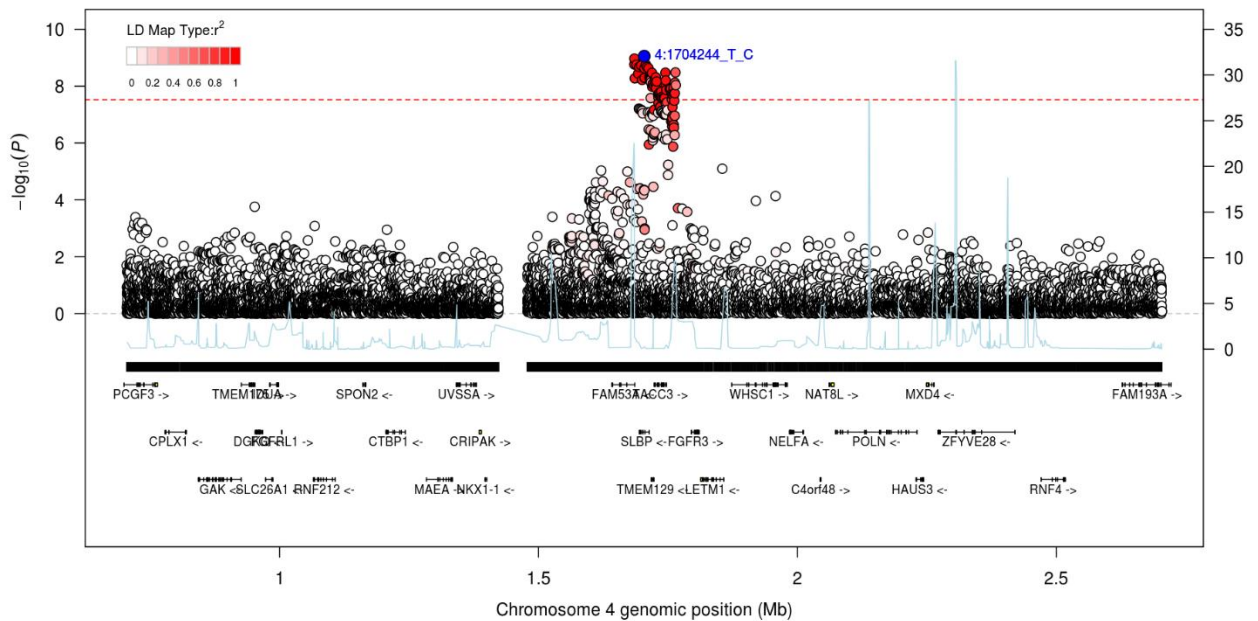

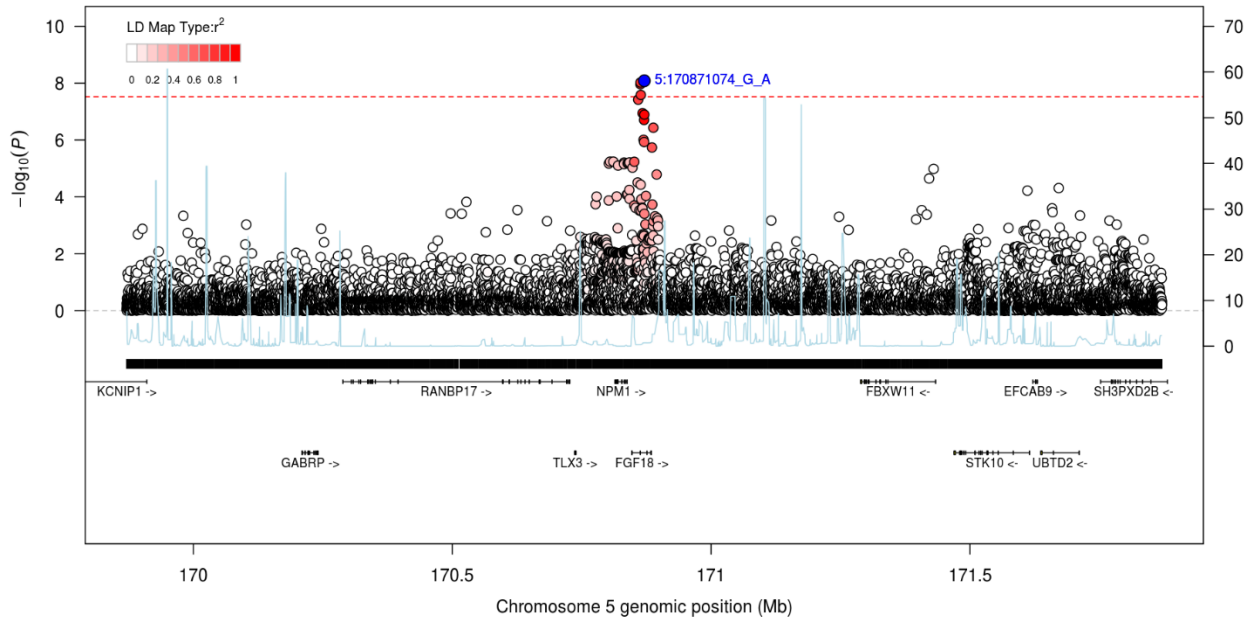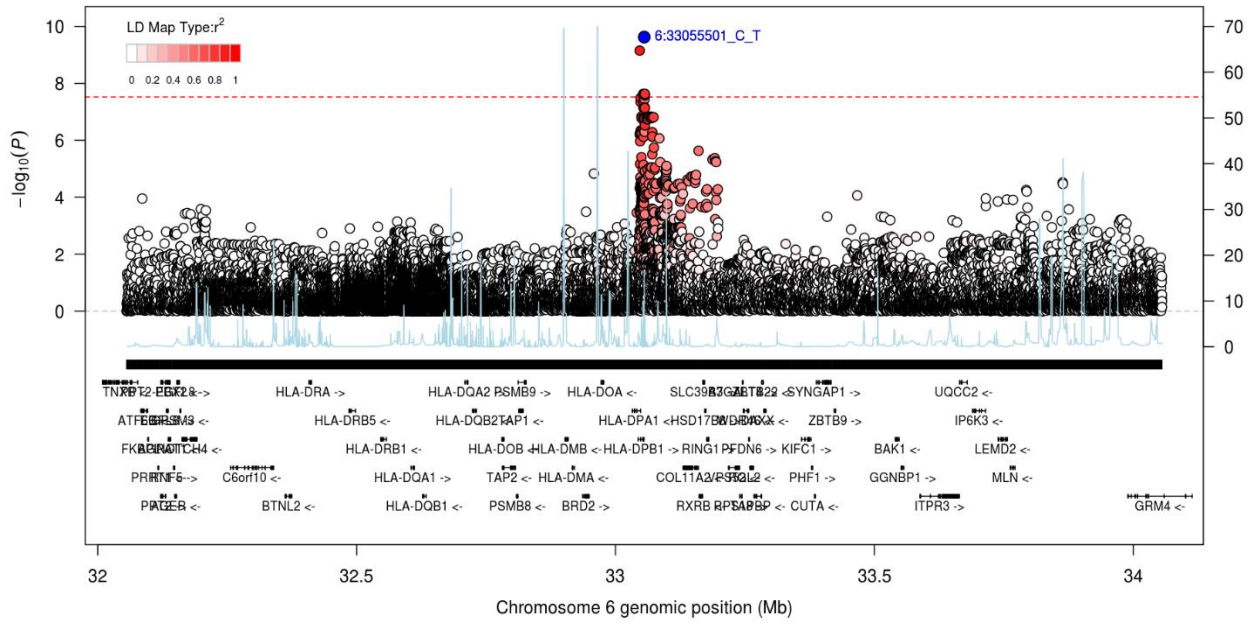

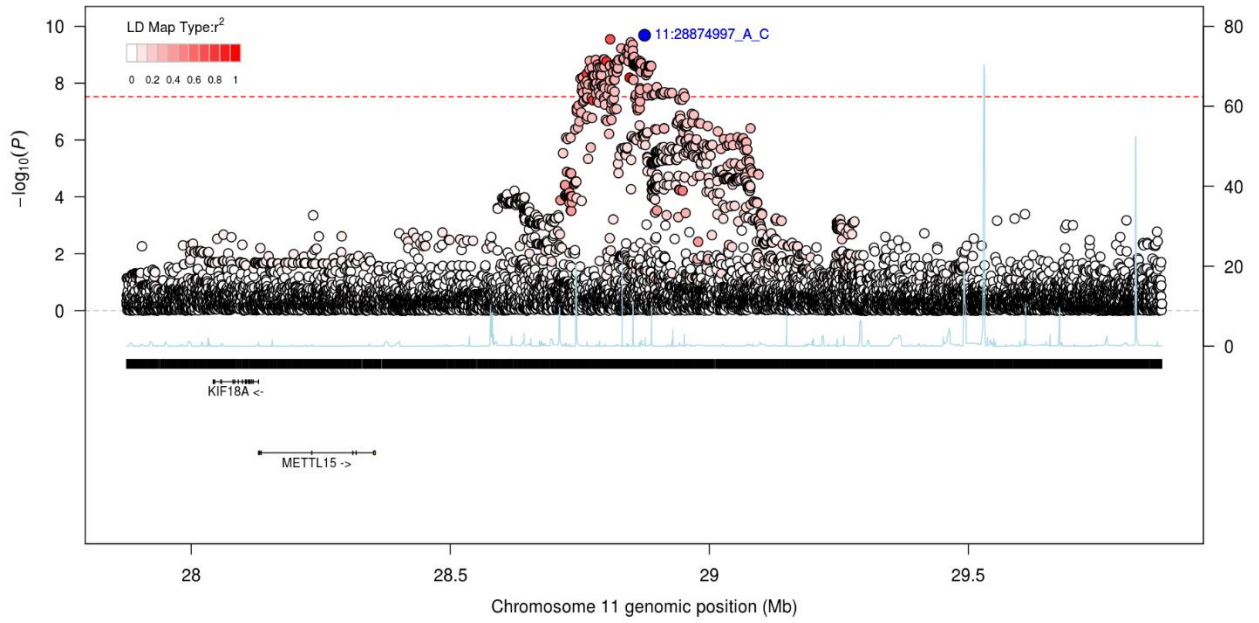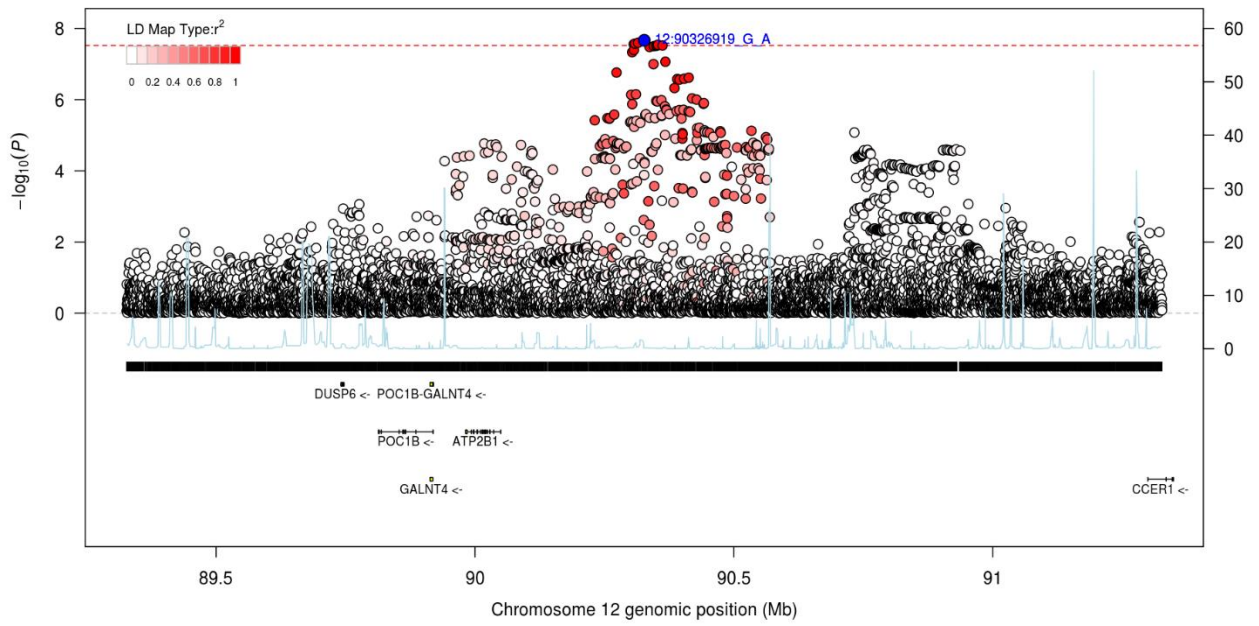

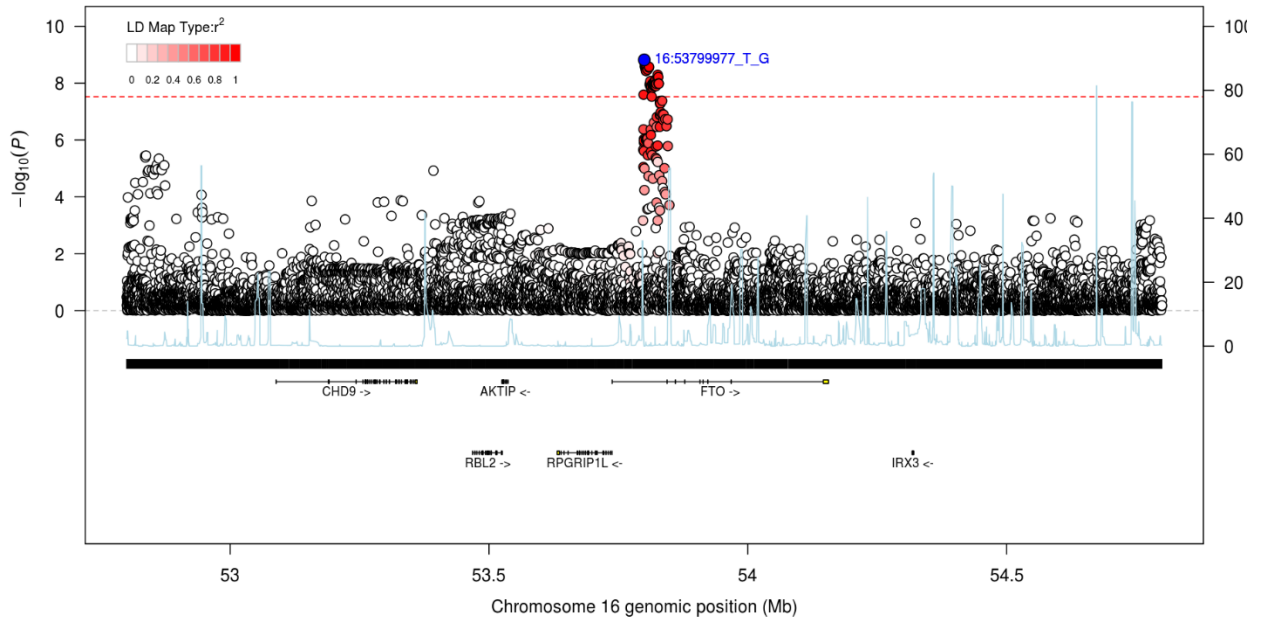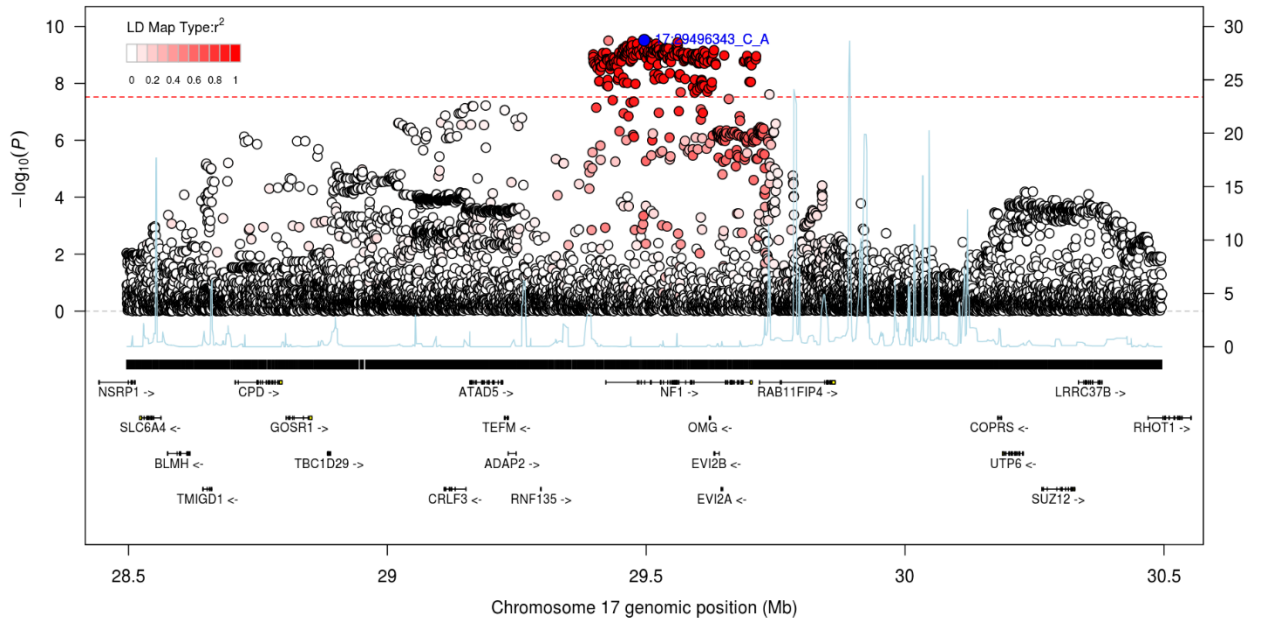

**Supplementary Figure 7: Overlap of genes implicated by different colocalisation analyses.** Gene overlap from associations between the osteoarthritis traits and expression levels in at least one human tissue using MetaXcan, Coloc and Piccolo.

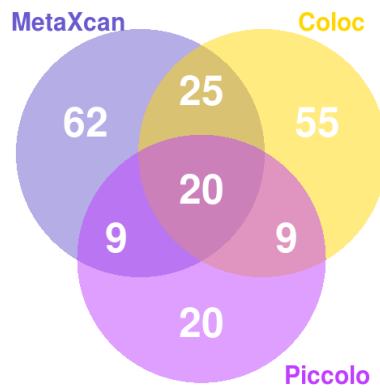



**Supplementary Figure 8: Average enrichment of genes by tissue.** We display the enrichment for the osteoarthritis phenotypes measured as the mean of the square of the Z-scores (effect size/standard error) of the association between the genetic component of gene expression and phenotype, as calculated by MetaXcan. We average the  $Z^2$  for only the Bonferroni corrected significant gene-tissue pairs (A), and we also further filter them to have probability of colocalisation of at least 80% (B). Pink and blue shades represent positive and negative effect sizes, respectively, while higher colour intensity indicates more significant association.

A

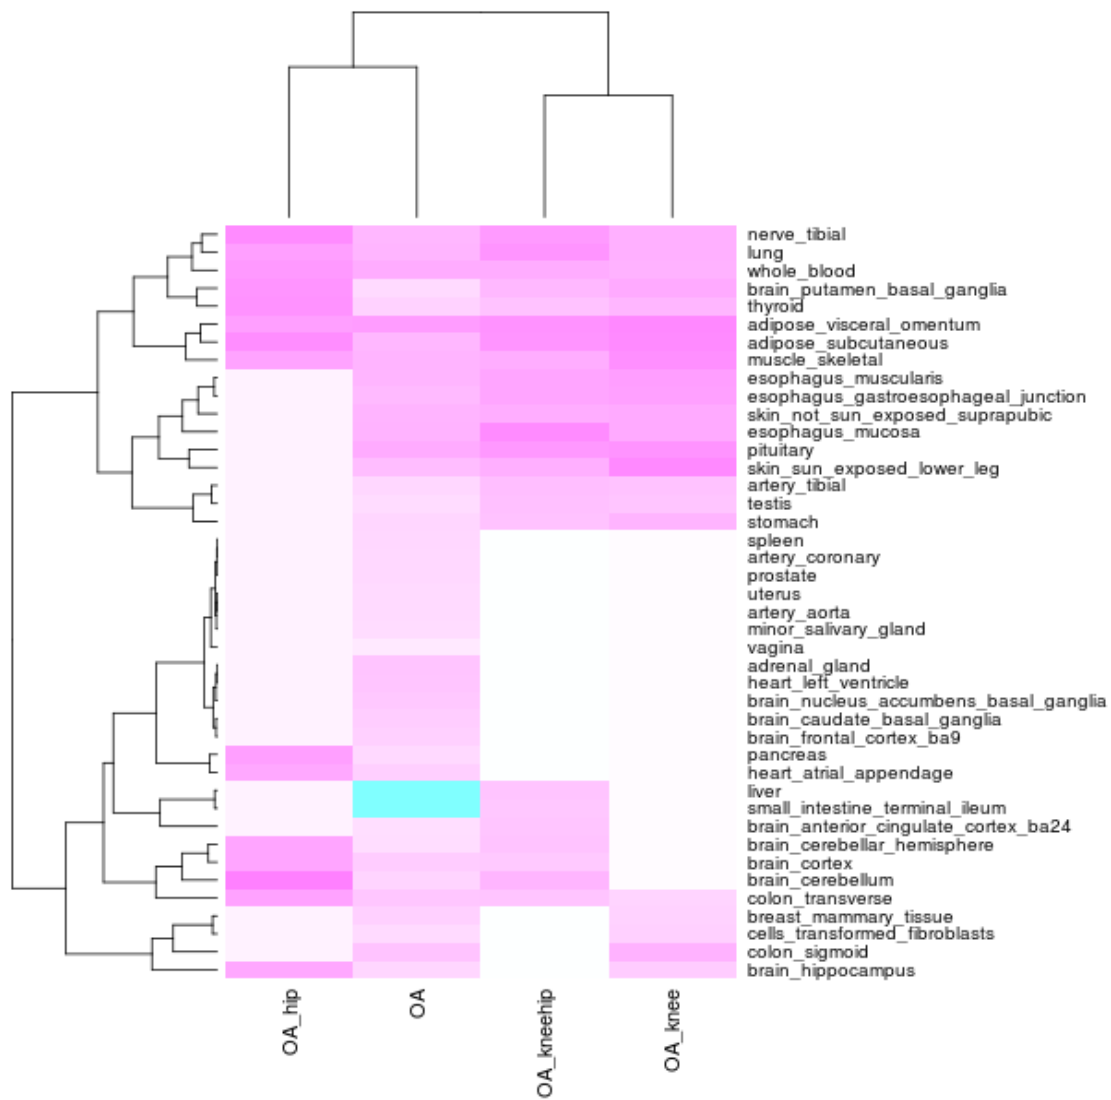

B

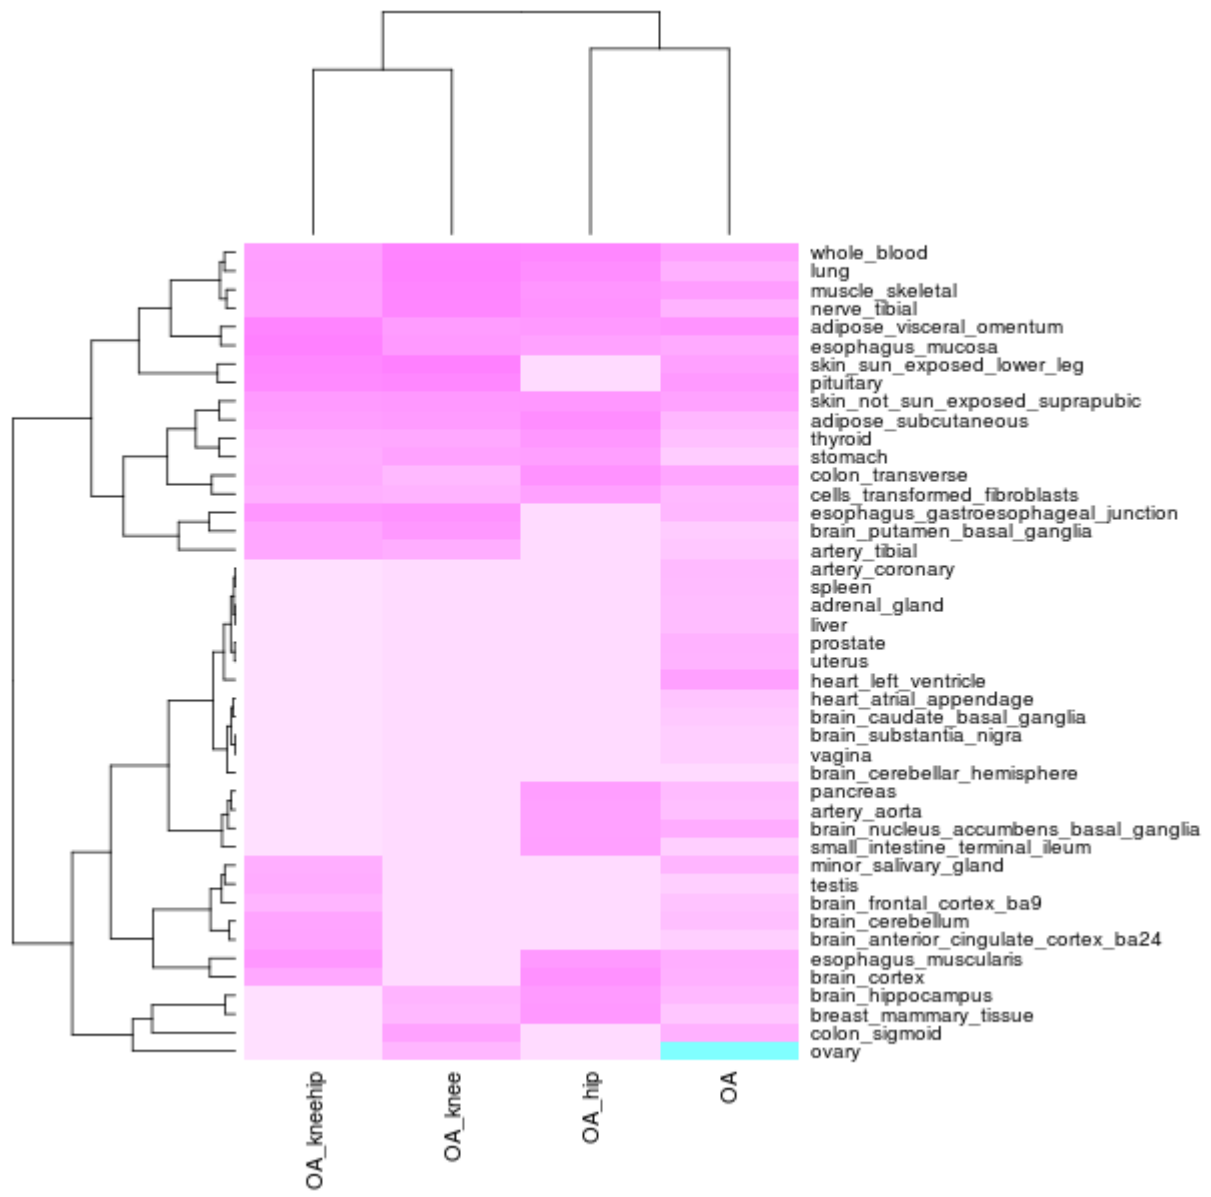

**Supplementary Figure 9: Effect sizes of each BMI instrument on BMI and osteoarthritis is shown.**

Two BMI-associated loci are genome-wide significantly associated with osteoarthritis (*SLC39A8* and *FTO*), and while the associations of *FTO* with osteoarthritis are of the magnitude expected given the causal effects of BMI on osteoarthritis, we find that *SLC39A8* missense SNV has a far larger effect on osteoarthritis than predicted based on its BMI-raising effects.

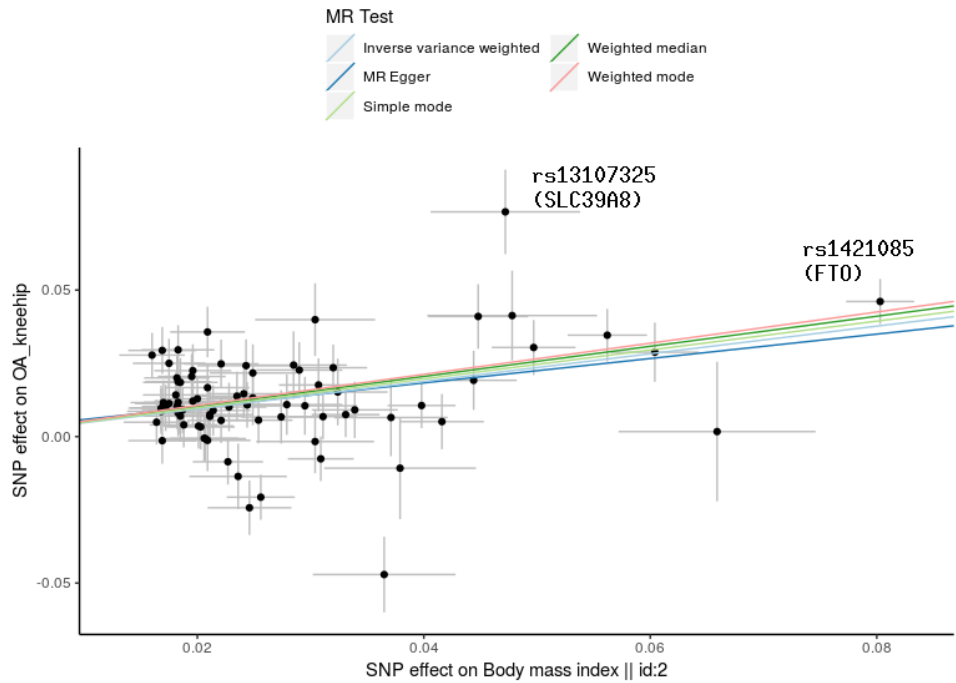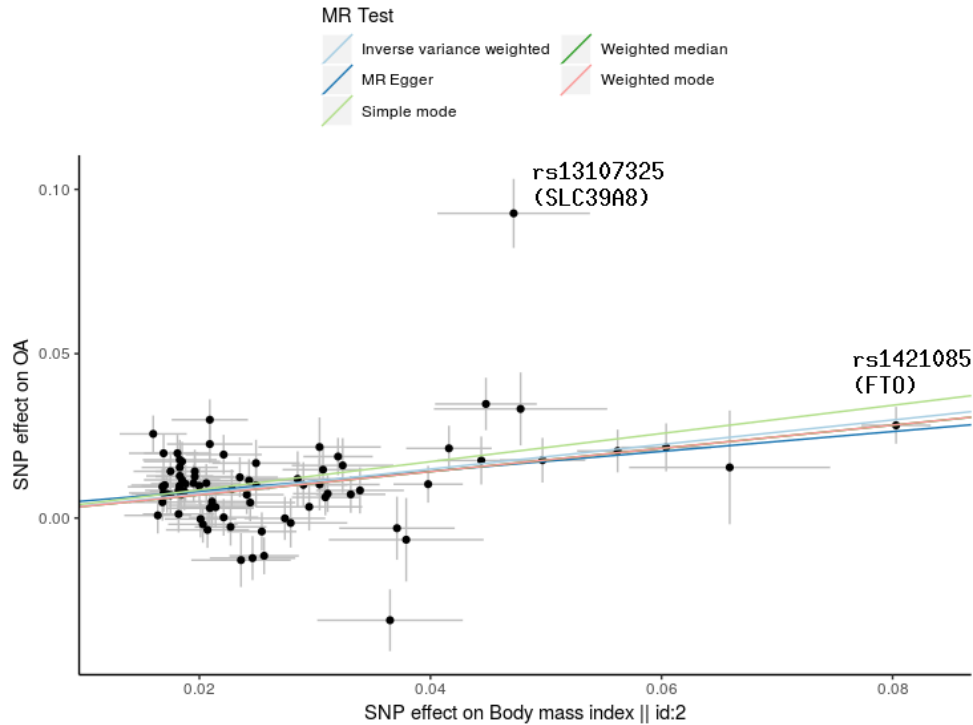

**Supplementary Table 1: Genetic correlation across the 4 osteoarthritis trait definitions using genome-wide summary statistics of common variants from the UK Biobank cohort.**

|                                | Osteoarthritis | Knee osteoarthritis | Hip osteoarthritis | Hip and/or knee osteoarthritis |
|--------------------------------|----------------|---------------------|--------------------|--------------------------------|
| Osteoarthritis                 | 1              | 0.914               | 0.678              | 0.947                          |
| Knee osteoarthritis            |                | 1                   | 0.498              | 0.935                          |
| Hip osteoarthritis             |                |                     | 1                  | 0.772                          |
| Hip and/or knee osteoarthritis |                |                     |                    | 1                              |

Supplementary Table 3: **Individual cohort summary statistics for the independent variants with  $P < 3 \times 10^{-8}$  in an inverse-variance weighted fixed effects meta-analysis of UK Biobank and arcOGEN.** Variant positions are reported according to build 37 and their alleles are coded based on the positive strand.

| RSID                         | Most Severe Consequence | EA                                 | NEA | UK Biobank |          | arcOGEN |          | EAF        |          |         |          |              |      |      |
|------------------------------|-------------------------|------------------------------------|-----|------------|----------|---------|----------|------------|----------|---------|----------|--------------|------|------|
|                              |                         |                                    |     | OR         | PV       | OR      | PV       | UK Biobank |          | arcOGEN |          | 1000 Genomes |      |      |
|                              |                         |                                    |     |            |          |         |          | Cases      | Controls | Cases   | Controls | GBR          | L95  | U95  |
| <b>Newly Identified Loci</b> |                         |                                    |     |            |          |         |          |            |          |         |          |              |      |      |
| rs4338381                    | sequence feature        | A                                  | G   | 1.1        | 4.70E-13 | 1.1     | 2.71E-03 | 0.653      | 0.631    | 0.654   | 0.632    | 0.62         | 0.55 | 0.69 |
| 1:150214028                  | downstream gene         | C                                  | CT  | 1.03       | 2.50E-08 |         |          | 0.368      | 0.36     |         |          |              |      |      |
| 1:174192402                  | intron                  | TAAA<br>AAAA<br>AAAA<br>AAAA<br>AA | T   | 1.03       | 1.10E-08 |         |          | 0.586      | 0.576    |         |          |              |      |      |
| rs11583641                   | 3 prime UTR             | C                                  | T   | 1.09       | 3.10E-09 | 1.07    | 5.55E-02 | 0.74       | 0.725    | 0.735   | 0.722    | 0.68         | 0.61 | 0.74 |
| rs10218792                   | intron                  | G                                  | T   | 1.04       | 7.40E-08 | 1.04    | 5.13E-02 | 0.274      | 0.268    | 0.274   | 0.266    | 0.2          | 0.15 | 0.27 |
| rs2061027                    | intron                  | A                                  | G   | 1.04       | 9.70E-12 | 1.07    | 6.58E-03 | 0.514      | 0.504    | 0.518   | 0.501    | 0.55         | 0.47 | 0.62 |
| rs12470967                   | intron                  | A                                  | G   | 1.06       | 1.50E-08 |         |          | 0.442      | 0.429    |         |          | 0.55         | 0.48 | 0.63 |
| rs62182810                   | intron                  | A                                  | G   | 1.03       | 6.20E-09 | 1.04    | 5.44E-02 | 0.554      | 0.546    | 0.556   | 0.547    | 0.52         | 0.45 | 0.6  |
| rs62262139                   | intron                  | A                                  | G   | 1.04       | 9.10E-11 |         |          | 0.544      | 0.535    |         |          | 0.54         | 0.47 | 0.62 |
| rs11732213                   | intron                  | T                                  | C   | 1.06       | 2.30E-09 | 1.04    | 1.46E-01 | 0.814      | 0.805    | 0.816   | 0.809    | 0.73         | 0.66 | 0.79 |
| rs1913707                    | intergenic region       | A                                  | G   | 1.07       | 9.00E-08 | 1.16    | 4.24E-06 | 0.627      | 0.611    | 0.642   | 0.608    | 0.59         | 0.52 | 0.66 |
| rs34811474                   | missense                | G                                  | A   | 1.04       | 3.70E-09 | 1.03    | 1.93E-01 | 0.775      | 0.767    | 0.787   | 0.782    | 0.71         | 0.64 | 0.77 |
| rs13107325                   | missense                | T                                  | C   | 1.1        | 4.10E-18 | 1.08    | 5.14E-02 | 0.08       | 0.074    | 0.087   | 0.081    | 0.1          | 0.06 | 0.15 |
| rs35611929                   | intron                  | A                                  | G   | 1.06       | 5.50E-08 | 1.06    | 7.93E-02 | 0.354      | 0.341    | 0.342   | 0.33     | 0.32         | 0.25 | 0.39 |
| rs3884606                    | intron                  | G                                  | A   | 1.04       | 2.10E-07 | 1.06    | 3.43E-03 | 0.498      | 0.487    | 0.5     | 0.484    | 0.47         | 0.39 | 0.54 |
| rs115740542                  | upstream gene           | C                                  | T   | 1.06       | 2.00E-08 | 1.06    | 6.72E-02 | 0.078      | 0.073    | 0.074   | 0.07     | 0.05         | 0.02 | 0.09 |

|            |                   |    |    |      |          |      |          |       |       |       |       |      |      |      |
|------------|-------------------|----|----|------|----------|------|----------|-------|-------|-------|-------|------|------|------|
| rs9277552  | downstream gene   | C  | T  | 1.06 | 9.30E-10 | 1.05 | 1.07E-01 | 0.796 | 0.786 | 0.825 | 0.817 | 0.7  | 0.62 | 0.76 |
| rs12154055 | intergenic region | G  | A  | 1.03 | 6.90E-09 | 0.99 | 8.95E-01 | 0.619 | 0.612 | 0.611 | 0.613 | 0.66 | 0.59 | 0.73 |
| rs80287694 | intron            | G  | A  | 1.13 | 2.10E-09 | 1.05 | 2.64E-01 | 0.125 | 0.113 | 0.116 | 0.111 | 0.15 | 0.1  | 0.22 |
| rs11409738 | intron            | TA | T  | 1.04 | 2.10E-10 |      |          | 0.375 | 0.366 |       |       | 0.39 | 0.32 | 0.47 |
| rs3330050  | upstream gene     | G  | C  | 1.04 | 2.90E-10 | 1.06 | 9.51E-01 | 0.515 | 0.505 | 0.514 | 0.5   | 0.45 | 0.37 | 0.52 |
| rs60890741 | upstream gene     | C  | CA | 1.11 | 4.50E-09 |      |          | 0.88  | 0.867 |       |       | 0.87 | 0.81 | 0.91 |
| rs919642   | intergenic region | T  | A  | 1.05 | 1.10E-14 | 1.03 | 1.96E-01 | 0.27  | 0.26  | 0.277 | 0.272 | 0.27 | 0.21 | 0.35 |
| rs1330349  | upstream gene     | C  | G  | 1.08 | 2.40E-09 | 1.09 | 3.93E-03 | 0.593 | 0.574 | 0.599 | 0.577 | 0.6  | 0.53 | 0.68 |
| rs62578127 | intron            | C  | T  | 1.09 | 2.00E-11 | 1.07 | 2.15E-02 | 0.651 | 0.631 | 0.655 | 0.64  | 0.6  | 0.52 | 0.67 |
| rs17659798 | intron            | A  | C  | 1.05 | 2.50E-09 | 1.06 | 2.14E-02 | 0.725 | 0.714 | 0.727 | 0.715 | 0.69 | 0.61 | 0.75 |
| rs11031191 | intergenic region | T  | G  | 1.03 | 3.30E-08 | 1.03 | 9.65E-02 | 0.354 | 0.347 | 0.355 | 0.348 | 0.36 | 0.29 | 0.44 |
| rs10896015 | upstream gene     | G  | A  | 1.08 | 2.30E-07 | 1.11 | 2.13E-03 | 0.745 | 0.73  | 0.749 | 0.728 | 0.69 | 0.62 | 0.76 |
| rs34419890 | upstream gene     | T  | C  | 1.13 | 2.70E-07 | 1.16 | 8.15E-03 | 0.933 | 0.925 | 0.94  | 0.931 | 0.93 | 0.88 | 0.96 |
| rs1149620  | upstream gene     | T  | A  | 1.04 | 2.50E-09 | 1.04 | 8.13E-02 | 0.58  | 0.571 | 0.576 | 0.567 | 0.58 | 0.51 | 0.65 |
| rs79056043 | intron            | G  | A  | 1.16 | 9.50E-07 | 1.28 | 6.44E-05 | 0.051 | 0.044 | 0.065 | 0.052 | 0.06 | 0.03 | 0.11 |
| rs317630   | intron            | T  | C  | 1.03 | 7.50E-08 | 1.04 | 1.79E-01 | 0.279 | 0.273 | 0.284 | 0.276 | 0.27 | 0.21 | 0.34 |
| rs11105466 | intron            | A  | G  | 1.04 | 8.30E-07 | 1.07 | 2.37E-03 | 0.415 | 0.415 | 0.429 | 0.412 | 0.41 | 0.34 | 0.48 |
| rs2171126  | intron            | T  | C  | 1.03 | 1.30E-08 | 1.06 | 6.78E-03 | 0.514 | 0.506 | 0.519 | 0.504 | 0.51 | 0.44 | 0.59 |
| rs11059094 | intron            | T  | C  | 1.07 | 9.80E-09 | 1.1  | 9.54E-04 | 0.494 | 0.477 | 0.497 | 0.472 | 0.45 | 0.37 | 0.52 |
| rs56116847 | upstream gene     | A  | G  | 1.07 | 4.40E-11 | 1    | 9.37E-01 | 0.369 | 0.354 | 0.364 | 0.363 | 0.35 | 0.28 | 0.43 |
| rs35912128 | upstream gene     | AT | A  | 1.08 | 2.20E-08 |      |          | 0.172 | 0.161 |       |       | 0.25 | 0.19 | 0.32 |

|                                 |                   |     |   |      |          |      |          |            |        |       |       |      |           |      |
|---------------------------------|-------------------|-----|---|------|----------|------|----------|------------|--------|-------|-------|------|-----------|------|
| rs35206230                      | downstream gene   | T   | C | 1.04 | 8.10E-12 | 1.05 | 6.44E-02 | 0.68       | 0.67   | 0.673 | 0.662 | 0.68 | 0.61      | 0.74 |
| rs6499244                       | 3 prime UTR       | A   | T | 1.06 | 6.40E-10 | 1.07 | 5.55E-03 | 0.427      | 0.441  | 0.577 | 0.559 | 0.52 | 0.45      | 0.6  |
| rs1126464                       | missense          | G   | C | 1.04 | 3.00E-11 | 0.99 | 8.88E-01 | 0.764      | 0.757  | 0.763 | 0.764 | 0.73 | 0.66      | 0.8  |
| rs35087650                      | intron            | ATT | A | 1.07 | 1.20E-09 |      |          | 0.255      | 0.241  |       |       | 0.27 | 0.21      | 0.35 |
| rs2953013                       | intron            | C   | A | 1.05 | 1.90E-09 | 1.05 | 4.36E-02 | 0.305      | 0.214  | 0.307 | 0.296 | 0.27 | 0.21      | 0.34 |
| rs62063281                      | intron            | G   | A | 1.1  | 1.60E-10 | 1.1  | 9.13E-03 | 0.236      | 0.22   | 0.249 | 0.232 | 0.25 | 0.19      | 0.32 |
| rs547116051                     | upstream gene     | AC  | A | 1.83 | 1.50E-08 |      |          | 0.000<br>6 | 0.0004 |       |       | 0    |           |      |
| rs7222178                       | intergenic region | A   | T | 1.1  | 2.60E-10 | 1.08 | 1.23E-02 | 0.213      | 0.197  | 0.205 | 0.193 | 0.18 | 0.13      | 0.25 |
| rs8067763                       | intergenic region | G   | A | 1.06 | 2.50E-09 | 1.03 | 3.83E-01 | 0.418      | 0.404  | 0.413 | 0.406 | 0.44 | 0.37      | 0.51 |
| rs10502437                      | intron            | G   | A | 1.03 | 3.60E-08 | 1.02 | 3.39E-01 | 0.61       | 0.604  | 0.61  | 0.604 | 0.58 | 0.51      | 0.65 |
| rs1560707                       | upstream gene     | T   | G | 1.04 | 1.70E-13 | 1.02 | 1.91E-01 | 0.378      | 0.368  | 0.382 | 0.376 | 0.4  | 0.33      | 0.47 |
| rs75621460                      | downstream gene   | A   | G | 1.16 | 4.40E-15 | 1.12 | 1.24E-02 | 0.021      | 0.018  | 0.028 | 0.025 | 0.03 | 0.01      | 0.07 |
| rs4252548                       | missense          | T   | C | 1.37 | 5.30E-13 | 1.11 | 1.63E-01 | 0.028      | 0.021  | 0.026 | 0.023 | 0.01 | 0.00<br>2 | 0.04 |
| rs2836618                       | intergenic region | A   | G | 1.08 | 1.90E-07 | 1.18 | 2.17E-06 | 0.275      | 0.261  | 0.285 | 0.252 | 0.19 | 0.14      | 0.26 |
| rs528981060                     | upstream gene     | A   | G | 1.68 | 2.40E-08 |      |          | 0.001<br>2 | 0.0008 |       |       |      |           |      |
| <b>Previously reported loci</b> |                   |     |   |      |          |      |          |            |        |       |       |      |           |      |
| rs2820443                       | intergenic region | C   | T | 1.06 | 9.90E-10 | 1.06 | 1.20E-02 | 0.308      | 0.297  | 0.312 | 0.299 | 0.26 | 0.2       | 0.34 |
| rs3771501                       | intron            | A   | G | 1.05 | 6.00E-15 | 1.06 | 1.31E-02 | 0.484      | 0.473  | 0.489 | 0.475 | 0.48 | 0.4       | 0.55 |
| rs3774355                       | upstream gene     | A   | G | 1.09 | 3.00E-10 | 1.15 | 2.07E-05 | 0.378      | 0.358  | 0.389 | 0.357 | 0.39 | 0.32      | 0.47 |
| rs2396502                       | intron            | C   | A | 1.09 | 1.80E-10 | 1.1  | 2.23E-03 | 0.622      | 0.602  | 0.622 | 0.6   | 0.64 | 0.57      | 0.71 |
| rs12209223                      | upstream gene     | A   | C | 1.16 | 2.50E-12 | 1.23 | 7.79E-06 | 0.113      | 0.1    | 0.124 | 0.104 | 0.09 | 0.06      | 0.15 |

|            |                   |   |   |      |          |      |          |       |       |       |       |      |      |      |
|------------|-------------------|---|---|------|----------|------|----------|-------|-------|-------|-------|------|------|------|
| rs10974438 | intron            | A | C | 1.03 | 1.10E-07 | 1.06 | 6.39E-03 | 0.657 | 0.649 | 0.658 | 0.646 | 0.63 | 0.55 | 0.7  |
| rs34687269 | intron            | A | T | 1.08 | 1.70E-10 | 1.1  | 1.67E-03 | 0.55  | 0.53  | 0.556 | 0.532 | 0.52 | 0.45 | 0.6  |
| rs10492367 | intergenic region | T | G | 1.16 | 2.90E-19 | 1.21 | 4.38E-07 | 0.209 | 0.187 | 0.219 | 0.188 | 0.18 | 0.13 | 0.25 |
| rs4775006  | intergenic region | A | C | 1.05 | 1.30E-07 | 1.12 | 2.58E-04 | 0.423 | 0.41  | 0.437 | 0.41  | 0.36 | 0.29 | 0.44 |
| rs12901372 | intron            | C | G | 1.07 | 2.90E-08 | 1.13 | 5.22E-05 | 0.549 | 0.532 | 0.565 | 0.535 | 0.47 | 0.4  | 0.55 |
| rs9930333  | intron            | G | T | 1.04 | 4.30E-07 | 1.1  | 2.57E-04 | 0.432 | 0.421 | 0.447 | 0.425 | 0.42 | 0.35 | 0.49 |
| rs143384   | 5 prime UTR       | A | G | 1.1  | 3.60E-22 | 1.07 | 9.24E-03 | 0.619 | 0.596 | 0.603 | 0.587 | 0.64 | 0.57 | 0.71 |

Most Severe Consequence: Most severe consequence of index variant as predicted by SNPEff; EA: Effect allele; NEA: Non-effect allele; OR: Odds ratio for the index trait in Table 1; PV: *P* value (two-sided) for the index trait in Table 1; EAF: Effect allele frequency; GBR: 1000 Genomes Project GBR; L95: lower 95% confidence intervals of the EAF for 1000 Genomes Project GBR; U95: 95% confidence intervals of the EAF for 1000 Genomes Project GBR.



**Supplementary Table 6: eQTL and pQTL studies used with Piccolo.**

| PMID     | TISSUE                                   | QTL type |
|----------|------------------------------------------|----------|
| 24604203 | Dendritic cells (derived from monocytes) | eQTL     |
| 22233810 | Dendritic cells                          | eQTL     |
| 24604202 | Monocytes                                | eQTL     |
| 28814792 | Monocytes                                | eQTL     |
| 25214635 | CD4+ T cells                             | eQTL     |
| 27768889 | Monocyte derived Macrophage              | eQTL     |
| 25874939 | PBMCs                                    | eQTL     |
| 26917434 | Leucocytes                               | eQTL     |
| 27768888 | Monocytes                                | eQTL     |
| 23878721 | Whole blood                              | eQTL     |
| 26151758 | Neutrophils                              | eQTL     |
| 24786080 | CD4(+) T cells and monocytes             | eQTL     |
| 24610777 | CD4(+) T cells and T regs                | eQTL     |
| 22446964 | Monocytes and B-cells                    | eQTL     |
| 28248954 | CD4+ and CD8+ T cells                    | eQTL     |
| 24013639 | Whole blood                              | eQTL     |
| 27918533 | Whole blood                              | eQTL     |
| 23209423 | Lung                                     | eQTL     |
| 21949713 | Sputum from COPD patients (ECLIPSE)      | pQTL     |
| 28564610 | Dorsal Root Ganglion                     | eQTL     |
| NA       | Serum asthma                             | pQTL     |
| 18462017 | Liver                                    | eQTL     |
| 21637794 | Liver                                    | eQTL     |
| 28240269 | Plasma                                   | pQTL     |

|          |        |      |
|----------|--------|------|
| 29875488 | Plasma | pQTL |
| 28193859 | Islet  | eQTL |
| 28575649 | Kidney | eQTL |

**Supplementary Table 11: Genetic correlations between osteoarthritis phenotypes and 69 other traits and diseases.** Estimates were made by LD score regression<sup>1</sup> as implemented in LDHub<sup>2</sup>. The table contains only traits with significant ( $P < 0.05$ ) correlation with at least one of the four definitions of osteoarthritis tested following multiple testing correction. Red font colour denotes non-significant correlation and negative values indicate negative correlations. AI: autoimmune; BV: brain volume; CM: cardiometabolic; C: cognitive; H: hormone; K: kidney; L: lipids; LF: lung function O: other

|                                                   | Osteoarthritis | Knee and/or hip osteoarthritis | Knee osteoarthritis | Hip osteoarthritis |                |
|---------------------------------------------------|----------------|--------------------------------|---------------------|--------------------|----------------|
| Fathers age at death                              | -0.3167        | -0.2569                        | -0.2989             | -0.1314            | Aging          |
| Mothers age at death                              | -0.3325        | -0.2782                        | -0.3202             | -0.0973            |                |
| Parents age at death                              | -0.2959        | -0.2323                        | -0.3467             | 0.0105             |                |
| Body fat                                          | 0.3578         | 0.3382                         | 0.3506              | 0.2017             | Anthropometric |
| Body mass index                                   | 0.4156         | 0.3923                         | 0.3873              | 0.2464             |                |
| Childhood obesity                                 | 0.3257         | 0.3049                         | 0.3008              | 0.2154             |                |
| Extreme bmi                                       | 0.3724         | 0.3849                         | 0.3558              | 0.2662             |                |
| Hip circumference                                 | 0.2891         | 0.3043                         | 0.2641              | 0.2424             |                |
| Obesity class 1                                   | 0.4061         | 0.3725                         | 0.3822              | 0.2142             |                |
| Obesity class 2                                   | 0.4320         | 0.4002                         | 0.3927              | 0.2508             |                |
| Obesity class 3                                   | 0.3968         | 0.3307                         | 0.3433              | 0.1653             |                |
| Overweight                                        | 0.4210         | 0.4028                         | 0.4015              | 0.2442             |                |
| Sitting height ratio                              | -0.1404        | -0.1139                        | -0.1126             | -0.0631            |                |
| Waist circumference                               | 0.3626         | 0.3569                         | 0.3271              | 0.2552             |                |
| Waist-to-hip ratio                                | 0.3068         | 0.2815                         | 0.2763              | 0.1573             |                |
| Asthma                                            | 0.2229         | 0.1275                         | 0.1276              | 0.0535             |                |
| Rheumatoid Arthritis                              | 0.1552         | 0.1110                         | 0.1224              | 0.0475             |                |
| Femoral neck bone mineral density (PMID:22504420) | 0.1425         | 0.1541                         | 0.1473              | 0.0932             | Bone           |
| Femoral neck bone mineral density (PMID:26367794) | 0.1147         | 0.1613                         | 0.1505              | 0.1192             |                |
| Lumbar spine bone mineral density (PMID:22504420) | 0.1939         | 0.2575                         | 0.2114              | 0.2271             |                |
| Lumbar spine bone mineral density (PMID:26367794) | 0.1197         | 0.2046                         | 0.1717              | 0.1714             |                |
| Mean Caudate                                      | 0.1557         | 0.1810                         | 0.1754              | 0.0937             | BV             |
| Lung cancer                                       | 0.2362         | 0.2014                         | 0.2465              | 0.0635             | Cancer         |
| Lung cancer (all)                                 | 0.2034         | 0.1943                         | 0.1985              | 0.1119             |                |
| Lung cancer (squamous cell) (PMID:24880342)       | 0.2913         | 0.2600                         | 0.2853              | 0.1367             |                |
| Squamous cell lung cancer (PMID:27488534)         | 0.3359         | 0.2951                         | 0.3412              | 0.1027             |                |
| Coronary artery disease                           | 0.1775         | 0.1361                         | 0.1469              | 0.0798             | CM             |

|                                                                        |         |         |         |         |                   |
|------------------------------------------------------------------------|---------|---------|---------|---------|-------------------|
| Intelligence                                                           | -0.2572 | -0.2245 | -0.2350 | -0.1361 | C                 |
| Childhood IQ                                                           | -0.2411 | -0.1919 | -0.2368 | -0.062  | Education         |
| College completion                                                     | -0.3600 | -0.2346 | -0.3027 | -0.0527 |                   |
| Years of schooling (proxy cognitive performance)                       | -0.3381 | -0.2232 | -0.2911 | -0.0447 |                   |
| Years of schooling 2013                                                | -0.3513 | -0.2295 | -0.3019 | -0.037  |                   |
| Years of schooling 2016                                                | -0.3797 | -0.2755 | -0.3225 | -0.1144 |                   |
| Fasting insulin main effect                                            | 0.217   | 0.1802  | 0.1953  | 0.0952  | Glycemic          |
| HbA1C                                                                  | 0.2155  | 0.1224  | 0.1623  | 0.0032  |                   |
| HOMA-IR                                                                | 0.2345  | 0.1951  | 0.1947  | 0.1011  |                   |
| Type 2 Diabetes                                                        | 0.1621  | 0.1173  | 0.1368  | 0.053   |                   |
| Leptin_not_adjBMI                                                      | 0.3051  | 0.2884  | 0.3466  | 0.1357  | H                 |
| Serum cystatin c                                                       | -0.1491 | -0.1227 | -0.1231 | -0.0692 | K                 |
| HDL cholesterol                                                        | -0.1020 | -0.0558 | -0.0754 | 0.0059  | L                 |
| Triglycerides                                                          | 0.0967  | 0.0496  | 0.0955  | -0.0617 |                   |
| Forced expiratory volume in 1 second (FEV1)                            | -0.1511 | -0.1176 | -0.1024 | -0.0844 | LF                |
| Forced expiratory volume in 1 second (FEV1)/Forced Vital capacity(FVC) | -0.1195 | -0.1177 | -0.1456 | -0.1157 |                   |
| Citrate                                                                | -0.2043 | -0.1992 | -0.2471 | 0.0021  | Metabolites       |
| Glycoprotein acetyls; mainly a1-acid glycoprotein                      | 0.1963  | 0.1034  | 0.1510  | -0.0085 |                   |
| Mean diameter for HDL particles                                        | -0.1592 | -0.1271 | -0.1218 | -0.0243 |                   |
| Tyrosine                                                               | 0.1858  | 0.1573  | 0.0234  | 0.2528  |                   |
| Urate                                                                  | 0.0865  | 0.0872  | 0.1101  | 0.0256  | O                 |
| Anorexia Nervosa                                                       | -0.1127 | -0.0995 | -0.0885 | -0.0871 | Psychiatric       |
| Attention deficit hyperactivity disorder                               | 0.3614  | 0.325   | 0.3384  | 0.1257  |                   |
| Attention deficit hyperactivity disorder (GC)                          | 0.3276  | 0.2088  | 0.1746  | 0.1314  |                   |
| Attention deficit hyperactivity disorder (No GC)                       | 0.3280  | 0.2088  | 0.1740  | 0.1324  |                   |
| Autism spectrum disorder                                               | -0.1930 | -0.2128 | -0.1989 | -0.171  |                   |
| Depressive symptoms                                                    | 0.3670  | 0.2192  | 0.2454  | 0.0771  |                   |
| PGC cross-disorder analysis                                            | -0.0496 | -0.1013 | -0.1345 | -0.0222 |                   |
| Schizophrenia                                                          | -0.0771 | -0.0919 | -0.1099 | -0.0204 |                   |
| Age at Menarche                                                        | -0.1179 | -0.0865 | -0.1023 | -0.0391 | Reproductive      |
| Age at Menopause                                                       | -0.1063 | -0.0663 | -0.0908 | -0.0113 |                   |
| Age of first birth                                                     | -0.4432 | -0.3073 | -0.3557 | -0.1259 |                   |
| Number of children ever born                                           | 0.2390  | 0.1626  | 0.1766  | 0.0712  |                   |
| Chronotype                                                             | 0.0682  | 0.0724  | 0.1062  | -0.0067 | Sleeping          |
| Insomnia (PMID:28604731)                                               | 0.3795  | 0.2383  | 0.2614  | 0.0953  |                   |
| Insomnia (PMID:27992416)                                               | 0.3399  | 0.1921  | 0.2135  | 0.0624  |                   |
| Sleep duration                                                         | -0.2465 | -0.1624 | -0.1869 | -0.0422 |                   |
| Excessive daytime sleepiness                                           | 0.1317  | 0.1281  | 0.0790  | 0.1530  | Smoking behaviour |
| Age of smoking initiation                                              | -0.2574 | -0.1299 | -0.0996 | 0.0254  |                   |
| Cigarettes smoked per day                                              | 0.2474  | 0.2224  | 0.3306  | -0.0163 |                   |
| Ever vs never smoked                                                   | 0.2614  | 0.2010  | 0.2211  | 0.0857  |                   |
| Former vs Current smoker                                               | -0.3613 | -0.3435 | -0.3015 | -0.2839 |                   |

**Supplementary Table 12: Genetic correlations between osteoarthritis phenotypes and 120 other traits and diseases from the UK Biobank resource.** Cross-trait LD score regression<sup>1</sup> as implemented in LDHub<sup>2</sup> was performed to calculate the genetic correlation estimates. The table contains only traits with significant correlations ( $P < 0.05$ ) across all osteoarthritis definitions. Negative values indicate negative correlations. A: aging; B: bone; C: cognitive; D: Disabilities; H: Hereditary; M: Mouth /teeth problems; Occup: occupational; R: Reproductive.

|                                                 | Osteoarthritis | Knee and/or hip osteoarthritis | Knee osteoarthritis | Hip osteoarthritis |                     |
|-------------------------------------------------|----------------|--------------------------------|---------------------|--------------------|---------------------|
| Mothers age at death                            | -0.5121        | -0.3996                        | -0.4200             | -0.2384            | A                   |
| Alcohol intake versus 10 years previously       | 0.3045         | 0.2217                         | 0.2237              | 0.1386             | Alcohol consumption |
| Average weekly champagne plus white wine intake | -0.2592        | -0.1762                        | -0.1593             | -0.1422            |                     |
| Average weekly spirits intake                   | 0.3743         | 0.3181                         | 0.3208              | 0.1931             |                     |
| Arm fat mass (left)                             | 0.4504         | 0.4181                         | 0.4408              | 0.2219             | Anthropometric      |
| Arm fat mass (right)                            | 0.4526         | 0.4198                         | 0.4436              | 0.2213             |                     |
| Arm fat percentage (left)                       | 0.4286         | 0.3819                         | 0.4101              | 0.1925             |                     |
| Arm fat percentage (right)                      | 0.4285         | 0.3805                         | 0.4104              | 0.1884             |                     |
| Arm fat-free mass (left)                        | 0.3139         | 0.3299                         | 0.3259              | 0.2048             |                     |
| Arm fat-free mass (right)                       | 0.2976         | 0.3203                         | 0.3130              | 0.2060             |                     |
| Arm predicted mass (left)                       | 0.3118         | 0.3258                         | 0.3250              | 0.1985             |                     |
| Arm predicted mass (right)                      | 0.3002         | 0.3207                         | 0.3135              | 0.2047             |                     |
| Basal metabolic rate                            | 0.3084         | 0.3295                         | 0.3281              | 0.2011             |                     |
| Body fat percentage                             | 0.4038         | 0.3564                         | 0.3781              | 0.1859             |                     |
| Body mass index (BMI)                           | 0.4932         | 0.4437                         | 0.4735              | 0.2303             |                     |
| Comparative body size at age 10                 | 0.1908         | 0.2019                         | 0.1680              | 0.1725             |                     |
| Hip circumference                               | 0.3906         | 0.3734                         | 0.3826              | 0.2179             |                     |
| Impedance of arm (left)                         | -0.3562        | -0.3347                        | -0.3471             | -0.1889            |                     |
| Impedance of arm (right)                        | -0.3519        | -0.3359                        | -0.3451             | -0.1948            |                     |
| Impedance of leg (left)                         | -0.2997        | -0.3039                        | -0.3253             | -0.1567            |                     |
| Impedance of leg (right)                        | -0.2955        | -0.3021                        | -0.3219             | -0.1598            |                     |
| Impedance of whole body                         | -0.3541        | -0.3460                        | -0.3629             | -0.1890            |                     |
| Leg fat mass (left)                             | 0.4662         | 0.4290                         | 0.4462              | 0.2385             |                     |
| Leg fat mass (right)                            | 0.4656         | 0.4257                         | 0.4429              | 0.2351             |                     |
| Leg fat percentage (left)                       | 0.4501         | 0.3907                         | 0.4131              | 0.2062             |                     |
| Leg fat percentage (right)                      | 0.4470         | 0.3838                         | 0.4069              | 0.1990             |                     |
| Leg fat-free mass (left)                        | 0.3118         | 0.3331                         | 0.3358              | 0.1997             |                     |
| Leg fat-free mass (right)                       | 0.2932         | 0.3205                         | 0.3214              | 0.1953             |                     |
| Leg predicted mass (left)                       | 0.3115         | 0.3337                         | 0.3366              | 0.1990             |                     |

|                                                                        |         |         |         |         |                 |
|------------------------------------------------------------------------|---------|---------|---------|---------|-----------------|
| Leg predicted mass (right)                                             | 0.2926  | 0.3201  | 0.3210  | 0.1952  |                 |
| Trunk fat mass                                                         | 0.3904  | 0.3686  | 0.3819  | 0.2038  |                 |
| Trunk fat percentage                                                   | 0.3645  | 0.3274  | 0.3469  | 0.1710  |                 |
| Trunk fat-free mass                                                    | 0.2256  | 0.2607  | 0.2490  | 0.1710  |                 |
| Trunk predicted mass                                                   | 0.2251  | 0.2613  | 0.2499  | 0.1708  |                 |
| Usual walking pace                                                     | -0.4197 | -0.3475 | -0.3695 | -0.1802 |                 |
| Waist circumference                                                    | 0.4675  | 0.4208  | 0.4422  | 0.2257  |                 |
| Weight                                                                 | 0.3951  | 0.3886  | 0.3971  | 0.2253  |                 |
| Whole body fat mass                                                    | 0.4249  | 0.3956  | 0.4128  | 0.2158  |                 |
| Whole body fat-free mass                                               | 0.2683  | 0.2980  | 0.2929  | 0.1866  |                 |
| Whole body water mass                                                  | 0.2698  | 0.2986  | 0.2934  | 0.1873  |                 |
| Heel bone mineral density (BMD) T-score_automated                      | 0.1214  | 0.1590  | 0.1243  | 0.1494  | B               |
| Fluid intelligence score                                               | -0.2616 | -0.2399 | -0.2531 | -0.1385 | C               |
| Vascular/heart problems diagnosed by doctor: High blood pressure       | 0.2335  | 0.1993  | 0.2112  | 0.1151  | Cardiometabolic |
| Vascular/heart problems diagnosed by doctor: None of the above         | -0.2540 | -0.2141 | -0.2245 | -0.1249 |                 |
| Non-cancer illness code_self-reported: hypertension                    | 0.2261  | 0.1945  | 0.2069  | 0.1084  |                 |
| Mineral and other dietary supplements: Glucosamine                     | 0.3414  | 0.3416  | 0.3062  | 0.2688  | Diet            |
| Mineral and other dietary supplements: None of the above               | -0.1890 | -0.1719 | -0.1315 | -0.1598 |                 |
| Long-standing illness_disability or infirmity                          | 0.5812  | 0.4321  | 0.4822  | 0.1872  | D               |
| Diagnoses - main ICD10: M20 Acquired deformities of fingers and toes   | 0.4811  | 0.4543  | 0.4816  | 0.2428  | Disorders       |
| Diagnoses - main ICD10: M23 Internal derangement of knee               | 0.7779  | 0.7314  | 0.8463  | 0.2628  |                 |
| Age completed full time education                                      | -0.3601 | -0.2721 | -0.3230 | -0.1061 | Education       |
| Qualifications: A levels/AS levels or equivalent                       | -0.3749 | -0.3090 | -0.3516 | -0.1496 |                 |
| Qualifications: College or University degree                           | -0.4027 | -0.3173 | -0.3538 | -0.1486 |                 |
| Qualifications: None of the above                                      | 0.3730  | 0.2998  | 0.3338  | 0.1410  |                 |
| Qualifications: O levels/GCSEs or equivalent                           | -0.3313 | -0.2916 | -0.3165 | -0.1498 |                 |
| Qualifications: Other professional qualifications eg: nursing_teaching | -0.2762 | -0.1963 | -0.2240 | -0.1067 |                 |
| Illnesses of siblings: Heart disease                                   | 0.3048  | 0.2590  | 0.2656  | 0.1567  | H               |
| Mouth/teeth dental problems: Dentures                                  | 0.3386  | 0.2811  | 0.3048  | 0.1527  | M               |

|                                                                                                                            |        |        |        |        |                       |
|----------------------------------------------------------------------------------------------------------------------------|--------|--------|--------|--------|-----------------------|
| Blood clot_ DVT_ bronchitis_ emphysema_ asthma_ rhinitis_ eczema_ allergy diagnosed by doctor: Blood clot in the leg (DVT) | 0.3549 | 0.3130 | 0.2539 | 0.2769 | Non-cancer illnesses  |
| Diagnoses - main ICD10: G56 Mononeuropathies of upper limb                                                                 | 0.6068 | 0.4872 | 0.5455 | 0.2212 |                       |
| Falls in the last year                                                                                                     | 0.4426 | 0.3589 | 0.3658 | 0.2008 |                       |
| Non-cancer illness code_ self-reported: chronic obstructive airways disease/copd                                           | 0.4333 | 0.3455 | 0.2765 | 0.3291 |                       |
| Non-cancer illness code_ self-reported: deep venous thrombosis (dvt)                                                       | 0.3593 | 0.3266 | 0.2716 | 0.2805 |                       |
| Diagnoses - main ICD10: J44 Other chronic obstructive pulmonary disease                                                    | 0.5122 | 0.4077 | 0.3873 | 0.2973 |                       |
| Number of self-reported non-cancer illnesses                                                                               | 0.4888 | 0.3475 | 0.3840 | 0.1423 |                       |
| Non-cancer illness code_ self-reported: hiatus hernia                                                                      | 0.5070 | 0.3562 | 0.3384 | 0.2155 |                       |
| Current employment status: Unable to work because of sickness or disability                                                | 0.5539 | 0.4366 | 0.4689 | 0.2270 | Occup                 |
| Job involves shift work                                                                                                    | 0.3642 | 0.3065 | 0.3362 | 0.1631 |                       |
| Diagnoses - main ICD10: T84 Complications of internal orthopaedic prosthetic devices_ implants and grafts                  | 0.7541 | 0.7625 | 0.7416 | 0.5256 | Operations            |
| Had other major operations                                                                                                 | 0.5479 | 0.4541 | 0.4543 | 0.2562 |                       |
| Number of operations_ self-reported                                                                                        | 0.5480 | 0.4561 | 0.4919 | 0.1994 |                       |
| Diagnoses - main ICD10: M16 Coxarthrosis [arthrosis of hip]                                                                | 0.5742 | 0.7023 | 0.4091 | 0.8903 | Osteoarthritis        |
| Diagnoses - main ICD10: M17 Gonarthrosis [arthrosis of knee]                                                               | 0.9190 | 0.8822 | 0.9628 | 0.4058 |                       |
| Non-cancer illness code_ self-reported: osteoarthritis                                                                     | 0.9714 | 0.8368 | 0.8563 | 0.4633 |                       |
| Health satisfaction                                                                                                        | 0.5927 | 0.4505 | 0.4793 | 0.2440 | Overall health rating |
| Number of treatments/medications taken                                                                                     | 0.5358 | 0.4134 | 0.4488 | 0.1940 |                       |
| Overall health rating                                                                                                      | 0.5623 | 0.4233 | 0.4675 | 0.1989 |                       |
| Taking other prescription medications                                                                                      | 0.5390 | 0.3716 | 0.3873 | 0.1804 |                       |
| Frequency of tiredness / lethargy in last 2 weeks                                                                          | 0.4468 | 0.2868 | 0.3443 | 0.0932 |                       |
| Back pain for 3+ months                                                                                                    | 0.4754 | 0.3766 | 0.3723 | 0.2508 | Pain                  |
| Chest pain or discomfort walking normally                                                                                  | 0.4305 | 0.3877 | 0.3840 | 0.2404 |                       |
| Diagnoses - main ICD10: M54 Dorsalgia                                                                                      | 0.6127 | 0.5510 | 0.5534 | 0.3649 |                       |
| Knee pain for 3+ months                                                                                                    | 0.6017 | 0.5468 | 0.5953 | 0.2366 |                       |
| Leg pain on walking                                                                                                        | 0.8159 | 0.6896 | 0.7262 | 0.3685 |                       |
| Medication for pain relief_ constipation_ heartburn: Laxatives (e.g. Dulcolax_ Senokot)                                    | 0.3990 | 0.3074 | 0.2975 | 0.2214 |                       |

|                                                                                                      |         |         |         |         |                 |
|------------------------------------------------------------------------------------------------------|---------|---------|---------|---------|-----------------|
| Medication for pain relief_<br>constipation_ heartburn: None of the<br>above                         | -0.5109 | -0.4043 | -0.4345 | -0.1978 |                 |
| Medication for pain relief_<br>constipation_ heartburn: Paracetamol                                  | 0.4576  | 0.3489  | 0.3815  | 0.1520  |                 |
| Neck/shoulder pain for 3+ months                                                                     | 0.6995  | 0.4954  | 0.4739  | 0.329   |                 |
| Pain type(s) experienced in last month:<br>Back pain                                                 | 0.5222  | 0.3813  | 0.4018  | 0.1929  |                 |
| Pain type(s) experienced in last month:<br>Hip pain                                                  | 0.6440  | 0.5197  | 0.4342  | 0.4627  |                 |
| Pain type(s) experienced in last month:<br>Knee pain                                                 | 0.7940  | 0.6979  | 0.7846  | 0.3007  |                 |
| Pain type(s) experienced in last month:<br>Neck or shoulder pain                                     | 0.5507  | 0.3920  | 0.4202  | 0.1855  |                 |
| Pain type(s) experienced in last month:<br>None of the above                                         | -0.6271 | -0.4974 | -0.5440 | -0.2350 |                 |
| Wheeze or whistling in the chest in last<br>year                                                     | 0.4853  | 0.3539  | 0.3834  | 0.1701  |                 |
| Medication for pain relief_<br>constipation_ heartburn: Omeprazole<br>(e.g. Zanprol)                 | 0.4935  | 0.3334  | 0.3657  | 0.1515  |                 |
| Diagnoses - main ICD10: R07 Pain in<br>throat and chest                                              | 0.4291  | 0.3028  | 0.3378  | 0.1523  |                 |
| Pain type(s) experienced in last month:<br>Pain all over the body                                    | 0.5292  | 0.3908  | 0.4098  | 0.1905  |                 |
| Job involves heavy manual or physical<br>work                                                        | 0.3399  | 0.2701  | 0.3218  | 0.0964  |                 |
| Job involves mainly walking or standing                                                              | 0.3141  | 0.252   | 0.2923  | 0.0977  |                 |
| Shortness of breath walking on level<br>ground                                                       | 0.6177  | 0.4674  | 0.5047  | 0.2254  |                 |
| Time spent driving                                                                                   | 0.2415  | 0.2556  | 0.2376  | 0.1765  |                 |
| Time spent watching television (TV)                                                                  | 0.3576  | 0.2917  | 0.3325  | 0.1103  |                 |
| Transport type for commuting to job<br>workplace: Car/motor vehicle                                  | 0.4611  | 0.4079  | 0.3762  | 0.2766  |                 |
| Transport type for commuting to job<br>workplace: Public transport                                   | -0.3676 | -0.3426 | -0.3179 | -0.2543 |                 |
| Transport type for commuting to job<br>workplace: Walk                                               | -0.3926 | -0.3798 | -0.3483 | -0.2808 |                 |
| Types of physical activity in last 4 weeks:<br>None of the above                                     | 0.4549  | 0.3301  | 0.3773  | 0.1213  |                 |
| Types of physical activity in last 4 weeks:<br>Walking for pleasure (not as a means of<br>transport) | -0.3725 | -0.2741 | -0.3065 | -0.1188 |                 |
| Types of transport used (excluding<br>work): Public transport                                        | -0.3037 | -0.2777 | -0.263  | -0.1918 |                 |
| Types of transport used (excluding<br>work): Walk                                                    | -0.3514 | -0.297  | -0.2841 | -0.1961 |                 |
| Illness_ injury_ bereavement_ stress in<br>last 2 years: Financial difficulties                      | 0.4292  | 0.3167  | 0.3582  | 0.1126  | Psychi<br>atric |
| Loneliness_ isolation                                                                                | 0.3249  | 0.2117  | 0.2191  | 0.1122  |                 |



|                                                                                        |         |         |         |         |                   |
|----------------------------------------------------------------------------------------|---------|---------|---------|---------|-------------------|
| Prospective memory result                                                              | 0.2713  | 0.2330  | 0.2145  | 0.1647  |                   |
| Risk taking                                                                            | 0.2249  | 0.1970  | 0.1904  | 0.1253  |                   |
| Number of children fathered                                                            | 0.2953  | 0.3065  | 0.3057  | 0.1756  | R                 |
| Ever smoked                                                                            | 0.1839  | 0.126   | 0.1121  | 0.0865  | Smoking behaviour |
| Light smokers_ at least 100 smokes in lifetime                                         | 0.2075  | 0.1967  | 0.1887  | 0.1358  |                   |
| Pack years adult smoking as proportion of life span exposed to smoking<br>PREVIEW ONLY | 0.4288  | 0.3162  | 0.3696  | 0.1255  |                   |
| Pack years of smoking PREVIEW ONLY                                                     | 0.4423  | 0.3323  | 0.3836  | 0.1336  |                   |
| Past tobacco smoking                                                                   | -0.2327 | -0.1755 | -0.1617 | -0.1170 |                   |
| Smoking status: Previous                                                               | 0.1878  | 0.1550  | 0.1307  | 0.1189  |                   |

**Supplementary Table 17:** Narrow sense osteoarthritis heritability explained by variants genome-wide (total  $h^2_L$ ) and the proportion of total  $h^2_L$  explained by genome-wide significant signals in the meta-analysis stage.

| Trait                          | Total $h^2_L$ (%)   | Total $h^2_L$ (%) explained by top signals | Proportion of total $h^2_L$ (%) explained by top signals |
|--------------------------------|---------------------|--------------------------------------------|----------------------------------------------------------|
| Osteoarthritis                 | 9.8 (8.57-9.91)     | 2.2                                        | 22.5                                                     |
| Hip osteoarthritis             | 16.38 (15.24-17.52) | 8.5                                        | 51.9                                                     |
| Knee osteoarthritis            | 15.69 (14.89-16.49) | 2.3                                        | 14.7                                                     |
| Knee and/or hip osteoarthritis | 13.2 (12.56-13.84)  | 3.2                                        | 24.2                                                     |

**Supplementary Table 19: Enrichment analysis of monogenic bone diseases on osteoarthritis loci.**

| Bone disease, developmental <sup>1</sup> |     |     |       |      |                 |                     |
|------------------------------------------|-----|-----|-------|------|-----------------|---------------------|
|                                          |     | Yes | No    | OR   | CI <sup>2</sup> | P <sup>3</sup>      |
| OA Loci                                  | Yes | 6   | 574   | 8.87 | 2.87 - 23.42    | 1.8x10 <sup>4</sup> |
|                                          | No  | 18  | 15281 |      |                 |                     |
| Early onset osteoarthritis <sup>4</sup>  |     |     |       |      |                 |                     |
|                                          |     | Yes | No    | OR   | CI              | P                   |
| OA Loci                                  | Yes | 3   | 577   | 8.83 | 1.53 - 35.52    | 0.008               |
|                                          | No  | 9   | 15290 |      |                 |                     |

<sup>1</sup> Diseases annotated with the MeSH term “bone disease, developmental” (Online Methods). <sup>2</sup> 95% confidence interval of the enrichment odds ratio (OR). <sup>3</sup> Enrichment *P* value (two-sided) from a Fisher’s exact test. <sup>4</sup> Genes underlying early onset osteoarthritis<sup>3</sup>.

**Supplementary Table 20: Genes in osteoarthritis loci causing monogenic bone diseases or early-onset osteoarthritis.**

| Gene           | Disease type <sup>1</sup> | Disease                                             | OMIM <sup>2</sup> | Orphanet <sup>3</sup> | Clinical symptoms                                                                                                                                                                                                                                                                      |
|----------------|---------------------------|-----------------------------------------------------|-------------------|-----------------------|----------------------------------------------------------------------------------------------------------------------------------------------------------------------------------------------------------------------------------------------------------------------------------------|
| <i>COL27A1</i> | BDD                       | STEEL Syndrome                                      | 615155            | ORPHA:438117          | Characteristic facies, dislocated hips and radial heads, carpal coalition (fusion of carpal bones), short stature, scoliosis, and cervical spine anomalies                                                                                                                             |
| <i>FGFR3</i>   | BDD                       | CATSHL syndrome                                     | 610474            | ORPHA:85164           | Camptodactyly (flexion deformity of the proximal interphalangeal joints), tall stature, and hearing loss syndrome                                                                                                                                                                      |
| <i>GDF5</i>    | BDD                       | Angel-shaped phalango-epiphyseal dysplasia          | 105835            | ORPHA:63442           | Angel-shaped middle phalanges, a typical metacarpophalangeal pattern profile (mainly affecting first metacarpals and middle phalanges of second, third and fifth digits, which all appear short), epiphyseal changes in the hips and, in some, abnormal dentition and delayed bone age |
| <i>RNF135</i>  | BDD                       | Overgrowth-macrocephaly-facial dysmorphism syndrome | 614192            | ORPHA:137634          | Tall stature, learning difficulties and facial dysmorphism                                                                                                                                                                                                                             |

|                |       |                                                           |        |              |                                                                                                                                                                                    |
|----------------|-------|-----------------------------------------------------------|--------|--------------|------------------------------------------------------------------------------------------------------------------------------------------------------------------------------------|
| <i>TBX4</i>    | BDD   | Ischiocoxopodopatella<br>r syndrome                       | 147891 | ORPHA:1509   | Bone dysplasia affecting skeletal structures of the lower limb and the pelvis                                                                                                      |
| <i>TKT</i>     | BDD   | SDDHD                                                     | 617044 | ORPHA:488618 | Short stature, developmental delay, and congenital heart defects (SDDHD)                                                                                                           |
| <i>COL11A1</i> | EO-OA | Stickler syndrome, type II                                | 604841 | ORPHA:90654  | Clinically variable disorder characterized by ocular, auditory, skeletal, and orofacial abnormalities. Additional findings may include multiple epiphyseal abnormalities and EO-OA |
| <i>COL11A2</i> | EO-OA | non-syndromic EO-OA                                       | na     | na           | Age of onset <50 years, OA in multiple joint sites (hip, knee, hand, spine)                                                                                                        |
| <i>SMAD3</i>   | EO-OA | LOEYS-DIETZ SYNDROME 3 (aneurysm osteoarthritis syndrome) | 613795 | ORPHA:284984 | Early-onset joint abnormalities, including OA, and arterial aneurysms.                                                                                                             |

<sup>1</sup> Indicates if the disease-causing gene was identified via the MeSH term “bone diseases, developmental (BDD) “or as a gene underlying “Early-onset Osteoarthritis” (EO-OA). <sup>2</sup> OMIM identification number from <https://www.omim.org/>. <sup>3</sup> Orphanet identification number from <http://www.orpha.net/>. “na” indicates not available.

## SUPPLEMENTARY NOTE

### STUDIES

*UK Biobank case and control definitions:* To define osteoarthritis cases, we used the self-reported status established during interview with a nurse (Field 20002; Initial assessment visit) and the Hospital Episode Statistics ICD10 primary and secondary codes. We conducted four osteoarthritis discovery GWAS: self-reported or hospital-diagnosed osteoarthritis at any site based on ICD10 hospital record codes M15-M19 (n=70,532); hospital-diagnosed hip osteoarthritis based on ICD10 hospital record M16 (n=12,850); hospital-diagnosed knee osteoarthritis based on ICD10 hospital record M17 codes (n=21,921); and hospital-diagnosed hip and/or knee osteoarthritis (M16 or M17; n=32,907). To minimise misclassification in the control datasets to the extent possible, in all analyses, from the controls, we excluded individuals with primary or secondary ICD10 codes M05 through M14, as well as arthrosis codes M15-M19. This excluded individuals with inflammatory polyarthropathies and resulted in a control sample size of 369,983 controls (Supplementary Figure 1).

#### *Genotyping, imputation and association testing*

*UK Biobank:* Briefly, 50,000 samples were genotyped using the UKBiLEVE array and the remaining samples were genotyped using the UK Biobank Axiom array (Affymetrix). After sample and SNP quality control (QC) of the directly-typed genotypes, followed by phasing and imputation, carried out centrally<sup>4</sup>, there are approximately 97million variants in 487,411 individuals. Following additional QC checks, we excluded samples with call rate  $\leq 95\%$ . We checked samples for gender discrepancies, excess heterozygosity, over third degree relatedness, ethnicity and we removed possibly contaminated and withdrawn samples. Variants with minor allele frequency (MAF) of  $\leq 0.1\%$  or effective minor allele count (imputation quality score times minor allele count)  $\leq 90$  were discarded. In summary, we interrogated approximately 17 million variants from 450,805 related individuals of European descent (Supplementary Figure 1).

Association analysis: Principle components (PCs) were computed using fastPCA<sup>5</sup> and high quality directly typed markers from the unrelated set of Europeans. PCs were then projected to the related European sample using SNP weights. We tested for association using the non-infinitesimal mixed model association test implemented in BOLT-LMM v2.3<sup>6</sup> with adjustment for the first 10 PCs, sex, age at recruitment and genotyping chip. As BOLT-LMM implements a linear regression, effect size estimates and their standard errors for case-control outcomes have been calculated by dividing the effect size estimates and standard errors output by the software by  $p \times (1 - p)$ , where  $p$  is the proportion of cases in the trait definition<sup>7</sup>.

*ArcOGEN and UKHLS:* 7,410 arcOGEN cases were genotyped on the Illumina Human 610-Quad array, 670 arcOGEN cases were genotyped on the Illumina OmniExpress array, and 9,296 UKHLS controls were genotyped on the Illumina CoreExome array. Genotype QC has been previously described<sup>8-10</sup>. Prior to imputation all variants were mapped to GRCh37 and cases and controls were merged into a single dataset containing overlapping variants. We further excluded variants with  $MAF \leq 1$ , indels, and evidence for differential missingness between cases and controls (Fisher's exact test  $P < 0.0001$ ). We performed a case-control analysis and visually inspected the cluster plots for any variant with  $P \leq 5 \times 10^{-8}$ ; variants with poor clusters were excluded. Final QC checks prior to imputation were performed using a HRC pre-imputation checking tool

(<http://www.well.ox.ac.uk/~wrayner/tools/#Checking>). Imputation was performed on 17,376 individuals and 126,188 variants using the Michigan HRC<sup>11,12</sup> imputation server with Eagle2<sup>13</sup> for the prephasing. We excluded related individuals by performing pair-wise identity-by-descent (IBD) (using PI\_HAT threshold  $> 0.2$ ) in PLINK<sup>14</sup> using directly typed variants with  $MAF > 1\%$  and pruned for LD using  $r^2 < 0.2$ . In addition, we excluded any individuals that were related to individuals in the UK Biobank dataset using the imputed variants and the same IBD method as described above. We also excluded any variant that had an imputation information score (minimac R-square)  $< 0.3$ , with a Hardy Weinberg  $P \leq 1 \times 10^{-6}$  and  $MAF \leq 0.1\%$ . The final dataset contained  $\sim 11.6$  million variants in 6,520

cases and 8,186 controls. Association analysis was performed using SNPTEST<sup>15</sup> with the first ten principal components as covariates. We used the odds ratio in the meta-analysis. The arcOGEN dataset comprised three osteoarthritis phenotypes: hip osteoarthritis (2,854 cases and 8,186 controls), knee osteoarthritis (3,034 cases and 8,186 controls), and hip and/or knee osteoarthritis (6,520 cases and 8,186 controls).

### TRANSCRIPTOME-WIDE ASSOCIATION

We observe 205 significant MetaXcan gene-trait associations in at least one tissue, which reduce to 69 when we filter out those with probability of colocalisation less than 80% (Supplementary Table 8). We observe 147 unique genes with at least one GTEx tissue significant association, while this number reduces to 52 genes if we filter the results by colocalisation probabilities (Supplementary Table 9). We calculated the average enrichment of genes by tissue for each of the osteoarthritis phenotypes as the mean of the square of the z-scores (effect size/standard error) of the association between the genetic component of gene expression and phenotype. We average the  $Z^2$  for all the Bonferroni corrected significant gene-tissue pairs, and after further filtering them to have probability of colocalisation of at least 80% (Supplementary Figure 8). We observe enrichment across whole blood, skeletal muscle and brain tissues.

### COLOCALISATION ANALYSIS

We observe evidence of colocalisation in at least one tissue for 50 out of our 64 loci using any of the 3 methods (MetaXcan, Coloc, Piccolo), 41 of which are at newly associated osteoarthritis signals (Supplementary Table 7). MetaXcan alone identified 119 genes, Coloc 113 and Piccolo 58, while the overlap of all 3 methods implicate 20 genes (*TGFA*, *ILF3*, *CSK*, *CYP1A1*, *ULK3*, *CHMP1A*, *TSKU*, *SUPT3H*, *GNL3*, *NT5DC2*, *LMX1B*, *SMAD3*, *MLXIP*, *COLGALT2*, *FAM89B*, *UQCC1*, *NFAT5*, *ALDH1A2*, *FAM53A*, *FGFR3*; Supplementary Figure 7). An interesting finding of the colocalisation analyses is for the known osteoarthritis locus around *GDF5*. There is a body of literature supporting *GDF5* as the susceptibility gene. In our analyses, we found more evidence of GWAS-eQTL association for nearby *UQCC1*. Piccolo reports significant GWAS-eQTL association in 2 tissues for *UQCC1* and none for *GDF5*, MetaXcan reports such associations in 15 tissues for *UQCC1* and 8 for *GDF5*, while Coloc reports associations in 17 tissues for *UQCC1* and 6 for *GDF5* (Supplementary Table 7). Specifically, higher predicted expression of *UQCC1* in fibroblast cells is associated with increased disease risk. Positive correlation was also predicted in skeletal muscle for *UQCC1*. No GWAS-eQTL association was predicted for *GDF5* in fibroblast cells or skeletal muscle. *UQCC1* has been previously associated in GWAS with developmental dysplasia of the hip, height, spine bone size and hip axis length. Further studies are needed to investigate the role of *UQCC1* at the same locus as *GDF5*.

### FINE-MAPPING

One out of the 64 regions contains a secondary signal reaching genome-wide significance ( $P$ -value  $< 3 \times 10^{-8}$  conditioned on the top signal). Six regions fine-map to a single variant, 20 regions to less than ten variants, and 26 regions to less than twenty variants (Supplementary Table 18). If we restrict the 95% credible sets to variants with posterior probability of causality (PPC) over 0.03 or to variants with moderate or high consequence (irrespective of their PPC), 60 out of the 64 regions fine-map to up to 17 variants, with 33 of these 60 regions containing the causal variant(s) with probability of over 80%. In 6 regions, variants with probability of causality over 0.03 in the 95% credible sets have more severe consequences than the index variant of the region (Supplementary Table 18). There are 28 genes in the 95% credible intervals with at least one possibly causal variant with high or moderate consequence (Supplementary Table 18). When we sum the PPC of variants with moderate or high consequence in the 95% credible set, four of these 28 genes have over 89% probability of containing the causal variant (*IL11*, *SLC39A8*, *ANAPC4*, *DPEP1*) and another three over 1% (*TSEN15*, *HFE*, *SLBP*). Five of these 28 genes overlap with MetaXcan and Coloc results (*MST1R*,

*RABGAP1L, TSEN15, UQCC1, CLEC18A*), 3 genes overlap with Piccolo results (*RAPH1, ITIH1, UQCC1*), while *UQCC1* is identified by all 4 approaches.

### **TRANSCRIPTOMIC AND PROTEOMIC ANALYSIS**

*Proteomics:* LC-MS analysis was performed on the Dionex Ultimate 3000 UHPLC system coupled with the Orbitrap Fusion Tribrid Mass Spectrometer. To account for protein loading, abundance values were normalised by the sum of all protein abundances in a given sample, then log<sub>2</sub>-transformed and quantile normalised. We restricted the analysis to 3917 proteins that were quantified in all samples. We tested proteins for differential abundance using limma<sup>16</sup> in R, based on a within-individual paired sample design. Significance was defined at 1% Benjamini-Hochberg FDR to correct for multiple testing. Of the 3732 proteins with unique mapping of gene name and Ensembl ID, we took forward 245 and 489 proteins with significantly different abundance between intact and degraded cartilage at 1% and 5% FDR, respectively (Supplementary Table 5).

RNA sequencing:

Multiplexed libraries were sequenced on the Illumina HiSeq 2000 (75bp paired-end read length). This yielded bam files for cohort 1 and cram files for cohorts 2 and 3. The cram files were converted to bam files using samtools 1.3.1<sup>17</sup> and then to fastq files using biobambam 0.0.191<sup>18</sup>, after exclusion of reads that failed QC. We obtained transcript-level quantification using salmon 0.8.2<sup>19</sup> (with --gcBias and --seqBias flags to account for potential biases) and the GRCh38 cDNA assembly release 87 downloaded from Ensembl. We converted transcript-level to gene-level count estimates, with estimates for 39037 genes based on Ensembl gene IDs. After QC, we retained expression estimates for 15994 genes with counts per million of 1 or higher in at least 10 samples. Limma-voom<sup>20</sup> was used to remove heteroscedasticity from the estimated expression data. We tested genes for differential expression using limma in R (with lmFit and eBayes), based on a within-individual paired sample design. Significance was defined at 1% Benjamini-Hochberg FDR to correct for multiple testing. Of the 14408 genes with unique mapping of gene name and Ensembl ID, we took forward 1705 genes with significantly different abundance between intact and degraded cartilage at 1% FDR.

### **FUNCTIONAL GENOMICS**

We examined quantitative proteomics and RNA sequencing data for all genes within 1Mb of the osteoarthritis-associated variants (Supplementary Table 5) to determine if they were differentially regulated between paired intact and degraded chondrocytes extracted from 38 osteoarthritis patients that had undergone total joint replacement surgery. At 1% FDR, 13 proteins show differential abundance (DA), and 122 genes show differential expression (DE) (Supplementary Table 5). Supplementary Table 5 additionally contains a systematic overview of all the analysis performed to identify the underlying causal gene/s on each region, including: eQTL colocalization analysis, variants with severe consequences on the credible sets (missense, etc), monogenic diseases and animal model data.

### **MENDELIAN RANDOMIZATION**

In analyses of exposures in MR-Base to osteoarthritis outcomes, genetic predisposition to higher BMI, hip and waist circumference was associated with higher risk of osteoarthritis of both the knee and hip (Supplementary Table 13). We also saw evidence of protection against knee osteoarthritis arising from higher years of schooling (Supplementary Table 13) and likelihood of attaining a university degree, although we acknowledge the complex nature of these phenotypes, uncertainty over the mechanistic links between educational attainment and OA and the potential for confounding by other factors. For example, predisposition to higher educational attainment is also associated with lower BMI<sup>21</sup>, and as such, we performed multivariable MR<sup>22</sup> to investigate the effect of educational attainment while adjusting for BMI. In these analyses, the association remained for education after adjusting for BMI (Supplementary Table 14). However, we acknowledge that the mechanisms and/or unknown confounders of this association are unclear. Predisposition to higher

LDL cholesterol (and various related lipid species) was protective against OA (Supplementary Table 13). In multivariable MR analyses of LDL-, HDL-cholesterol and triglycerides, LDL cholesterol associations remained, but we saw no associations with HDL-cholesterol or triglycerides (Supplementary Table 14). Among the exposures recently included in MR-Base<sup>21</sup> following large-scale GWAS analysis of UK Biobank, we saw similar associations with BMI, education and statin therapy as a proxy for cholesterolaemia (Supplementary Table 13). We also saw associations of genetic predisposition to knee pain (as instrumented in UK Biobank) with risk of osteoarthritis (Supplementary Table 13), although these associations may reflect reverse causality in that of the seven knee pain instruments, three were also genome-wide significantly associated with osteoarthritis. In analyses investigating the potential causal consequences of predisposition to osteoarthritis, all significant associations were observed in the outcome data derived from the same UK Biobank population in which the osteoarthritis instruments were derived (Supplementary Table 15). We saw potential causal relationships with pain phenotypes and medications, glucosamine supplementation, self-reported walking pace and hand grip strength, among other phenotypes. Self-report of both knee and hip pain in the last month were among the leading associations with predisposition to osteoarthritis (Supplementary Table 15). We next tested the association of predisposition to osteoarthritis with reported pain, but restricted to individuals in UK Biobank who had not reported, nor been hospital-diagnosed with osteoarthritis. In those analyses, we found that higher risk of osteoarthritis was associated with higher likelihood of reporting pain phenotypes (Supplementary Table 16) further suggesting that the apparent causal association of pain with OA is driven by reverse causality. Recent analyses have highlighted the potential for adjustment or stratification by heritable risk factors to induce collider bias<sup>23</sup>, however, in this instance, the direction of bias is opposite to the effect that we observe, suggesting that the effects in the “undiagnosed- osteoarthritis” group are not the result of collider bias.

## PATHWAY ANALYSIS

We conducted gene-set enrichment analyses in MAGMA v1.06<sup>24</sup>, DEPICT<sup>25</sup> and PASCAL<sup>26</sup> to understand the potential functional effects of the identified variants and to identify biological pathways implicated in osteoarthritis by using widely-used gene annotation databases (Methods). MAGMA's pathway analysis identifies two biological processes associated with osteoarthritis: collagen formation ( $P=5.63 \times 10^{-5}$  in self-reported or hospital diagnosed osteoarthritis;  $P=1.53 \times 10^{-6}$  in hip osteoarthritis;  $P=4.74 \times 10^{-7}$  in hip and/or knee osteoarthritis) and extracellular matrix (ECM) organization (Reactome database:  $P=1.98 \times 10^{-5}$  in hip osteoarthritis;  $P=1.17 \times 10^{-6}$  in hip and/or knee osteoarthritis; GO database:  $P=2.31 \times 10^{-5}$  in hip and/or knee osteoarthritis) (Supplementary Table 10). Collagen formation ( $P=1.40 \times 10^{-4}$  in osteoarthritis at any site;  $P=4.95 \times 10^{-7}$  in hip osteoarthritis;  $P=1.37 \times 10^{-5}$  in hip and/or knee osteoarthritis) and ECM organization ( $P=1.46 \times 10^{-4}$  in osteoarthritis at any site;  $P=6.54 \times 10^{-6}$  in hip osteoarthritis;  $P=1.10 \times 10^{-6}$  in hip and/or knee osteoarthritis) are also identified as significant gene sets at  $FDR < 0.05$  in 3/4 osteoarthritis phenotypes by PASCAL analysis (Supplementary File 10). Protein binding is the most significant gene set in all phenotypes tested ( $P=2.81 \times 10^{-8}$  in osteoarthritis at any site;  $P=3.56 \times 10^{-7}$  in hip osteoarthritis;  $P=2.76 \times 10^{-8}$  in knee osteoarthritis;  $P=7.47 \times 10^{-9}$  in hip and/or knee osteoarthritis). Apart from the above 3, PASCAL reveals 7 more pathways of which collagen catabolic process is significant in hip ( $P=1.19 \times 10^{-4}$ ) and hip and/or knee osteoarthritis ( $P=9.95 \times 10^{-5}$ ). DEPICT pathway analysis resulted in 4, 22 and 35 significant gene sets at  $FDR < 0.05$  for osteoarthritis at any site, hip osteoarthritis and hip and/or knee osteoarthritis, respectively (Supplementary File 10). The 5 most significant gene sets are a) abnormal fibula morphology ( $P=8.05 \times 10^{-7}$  in hip osteoarthritis), b) abnormal cartilage morphology ( $P=9.25 \times 10^{-7}$  in hip and/or knee osteoarthritis), c) abnormal vertebral body morphology ( $P=2.09 \times 10^{-6}$  in hip and/or knee osteoarthritis), d) regulation of growth ( $P=2.48 \times 10^{-6}$  in osteoarthritis at any site) and regulation of cartilage development ( $P=2.56 \times 10^{-6}$  in hip and/or knee osteoarthritis). The first three gene sets belong to Mammalian Phenotype Ontology (MP) database where the last two in Gene Ontology (GO).



Collagen formation and ECM organization were the two biological pathways identified by both MAGMA and PASCAL. ECM is a non-cellular component of all mammalian tissues, a network consisting of proteoglycans, laminins, fibronectin and collagen<sup>27</sup>. The relative abundance of ECM proteins and their interactions enables the ECM to carry out tissue-specific roles, including proliferation, adhesion, migration, cell differentiation and death<sup>27,28</sup>. Collagens are an essential component of the ECM and are involved in structural integrity<sup>29</sup> and processes such as tissue reconstruction<sup>30</sup>. Articular cartilage degeneration in osteoarthritis is associated with changes in type II collagen and further ECM components<sup>31</sup>. The two identified pathways are not independent of each other: the collagen formation gene-set is a subset of the ECM organization gene-set.

### THE ARCOGEN CONSORTIUM

John Loughlin<sup>1</sup>, Nigel Arden<sup>2</sup>, Fraser Birrell<sup>3,4</sup>, Andrew Carr<sup>2,5</sup>, Panos Deloukas<sup>6,7</sup>, Michael Doherty<sup>8</sup>, Andrew W. McCaskie<sup>9,10</sup>, William E. R. Ollier<sup>11</sup>, Ashok Rai<sup>12</sup>, Stuart H. Ralston<sup>13</sup>, Tim D. Spector<sup>14</sup>, Ana M. Valdes<sup>8</sup>, Gillian A. Wallis<sup>15</sup>, J. Mark Wilkinson<sup>16</sup>, Eleftheria Zeggini<sup>17,18</sup>.

### Affiliations

1. Musculoskeletal Research Group, Institute of Cellular Medicine, Newcastle University, Newcastle-upon-Tyne, NE2 4HH, UK.
2. Botnar Research Centre, University of Oxford, Nuffield Orthopaedic Centre, Oxford, OX3 7LD UK.
3. Musculoskeletal Research Group, Institute of Cellular Medicine, Newcastle University, Newcastle-upon-Tyne, NE2 4HH, UK.
4. Northumbria Healthcare NHS Foundation Trust, Wansbeck General Hospital, NE63 9JJ, UK.
5. NIHR Oxford Biomedical Research Centre John Radcliffe Hospital Oxford OX3 9DU UK.
6. William Harvey Research Institute, Barts and The London School of Medicine and Dentistry, Queen Mary University, London, EC1M 6BQ, UK.
7. Princess Al-Jawhara Al-Brahim Centre of Excellence in Research of Hereditary Disorders (PACER-HD), King Abdulaziz University Jeddah, 21589, Saudi Arabia.
8. Academic Rheumatology, School of Medicine, University of Nottingham, UK, Nottingham, NG5 1PB, UK.
9. Division of Trauma and Orthopaedic Surgery, Department of Surgery, University of Cambridge Cambridge, CB2 0QQ, UK.
10. Musculoskeletal Research Group, Institute of Cellular Medicine, Newcastle University Newcastle-upon-Tyne, NE2 4HH, UK.
11. [School of Healthcare Science, Manchester Metropolitan University, Manchester M1 5GD, UK.](#)
12. Worcestershire Acute Hospitals NHS Trust, Worcester, UK.
13. Centre for Genomic and Experimental Medicine, Institute of Genetics and Molecular Medicine, University of Edinburgh, Edinburgh, EH4 2XU, UK.
14. Department of Twin Research and Genetic Epidemiology, King's College London, London, SE1 7EH, UK.
15. Wellcome Centre for Cell Matrix Research, University of Manchester, Manchester M13 9PT UK.
16. Department of Oncology and Metabolism, University of Sheffield, Sheffield, [S10 2JF, UK.](#)
17. Wellcome Sanger Institute, Wellcome Genome Campus, Hinxton, CB10 1SA, UK.
18. Institute of Translational Genomics, Helmholtz Zentrum München – German Research Center for Environmental Health, Neuherberg, Germany

### REFERENCES

1. Bulik-Sullivan, B.K. *et al.* LD Score regression distinguishes confounding from polygenicity in genome-wide association studies. *Nat Genet* **47**, 291-5 (2015).
2. Zheng, J. *et al.* LD Hub: a centralized database and web interface to perform LD score regression that maximizes the potential of summary level GWAS data for SNP heritability and genetic correlation analysis. *Bioinformatics* **33**, 272-279 (2017).
3. Aury-Landas, J., Marcelli, C., Leclercq, S., Boumediene, K. & Bauge, C. Genetic Determinism of Primary Early-Onset Osteoarthritis. *Trends Mol Med* **22**, 38-52 (2016).
4. Bycroft, C. *et al.* Genome-wide genetic data on ~500,000 UK Biobank participants. *Preprint at <https://www.biorxiv.org/content/early/2017/07/20/166298>* (2017).
5. Galinsky, K.J. *et al.* Fast Principal-Component Analysis Reveals Convergent Evolution of ADH1B in Europe and East Asia. *Am J Hum Genet* **98**, 456-472 (2016).
6. Loh, P.R. *et al.* Efficient Bayesian mixed-model analysis increases association power in large cohorts. *Nat Genet* **47**, 284-90 (2015).
7. Cook, J.P., Mahajan, A. & Morris, A.P. Guidance for the utility of linear models in meta-analysis of genetic association studies of binary phenotypes. *Eur J Hum Genet* **25**, 240-245 (2017).
8. arcOGEN Consortium *et al.* Identification of new susceptibility loci for osteoarthritis (arcOGEN): a genome-wide association study. *Lancet* **380**, 815-23 (2012).
9. Evangelou, E. *et al.* A meta-analysis of genome-wide association studies identifies novel variants associated with osteoarthritis of the hip. *Ann Rheum Dis* **73**, 2130-6 (2014).
10. Prins, B.P. *et al.* Genome-wide analysis of health-related biomarkers in the UK Household Longitudinal Study reveals novel associations. *Sci Rep* **7**, 11008 (2017).
11. McCarthy, S. *et al.* A reference panel of 64,976 haplotypes for genotype imputation. *Nat Genet* **48**, 1279-83 (2016).
12. Das, S. *et al.* Next-generation genotype imputation service and methods. *Nat Genet* **48**, 1284-1287 (2016).
13. Loh, P.R. *et al.* Reference-based phasing using the Haplotype Reference Consortium panel. *Nat Genet* **48**, 1443-1448 (2016).
14. Purcell, S. *et al.* PLINK: a tool set for whole-genome association and population-based linkage analyses. *Am J Hum Genet* **81**, 559-75 (2007).
15. Marchini, J., Howie, B., Myers, S., McVean, G. & Donnelly, P. A new multipoint method for genome-wide association studies by imputation of genotypes. *Nat Genet* **39**, 906-13 (2007).
16. Ritchie, M.E. *et al.* limma powers differential expression analyses for RNA-sequencing and microarray studies. *Nucleic Acids Res* **43**, e47 (2015).
17. Li, H. *et al.* The Sequence Alignment/Map format and SAMtools. *Bioinformatics* **25**, 2078-2079 (2009).
18. Tischler, G. & Leonard, S. biobambam: tools for read pair collation based algorithms on BAM files. *Source Code for Biology and Medicine* **9**, 13-13 (2014).
19. Patro, R., Duggal, G., Love, M.I., Irizarry, R.A. & Kingsford, C. Salmon provides fast and bias-aware quantification of transcript expression. *Nat Meth* **14**, 417-419 (2017).
20. Law, C.W., Chen, Y., Shi, W. & Smyth, G.K. voom: precision weights unlock linear model analysis tools for RNA-seq read counts. *Genome Biology* **15**, R29 (2014).
21. Hemani, G. *et al.* The MR-Base platform supports systematic causal inference across the human phenome. *eLife* **7**:e34408(2018).
22. Burgess, S. & Thompson, S.G. Multivariable Mendelian randomization: the use of pleiotropic genetic variants to estimate causal effects. *Am J Epidemiol* **181**, 251-60 (2015).
23. Day, F.R., Loh, P.R., Scott, R.A., Ong, K.K. & Perry, J.R. A Robust Example of Collider Bias in a Genetic Association Study. *Am J Hum Genet* **98**, 392-3 (2016).
24. de Leeuw, C.A., Mooij, J.M., Heskes, T. & Posthuma, D. MAGMA: generalized gene-set analysis of GWAS data. *PLoS Comput Biol* **11**, e1004219 (2015).

25. Pers, T.H. *et al.* Biological interpretation of genome-wide association studies using predicted gene functions. *Nat Commun* **6**, 5890 (2015).
26. Lamparter, D., Marbach, D., Rueedi, R., Kutalik, Z. & Bergmann, S. Fast and Rigorous Computation of Gene and Pathway Scores from SNP-Based Summary Statistics. *PLoS Comput Biol* **12**, e1004714 (2016).
27. Mouw, J.K., Ou, G. & Weaver, V.M. Extracellular matrix assembly: a multiscale deconstruction. *Nat Rev Mol Cell Biol* **15**, 771-85 (2014).
28. Hynes, R.O. The extracellular matrix: not just pretty fibrils. *Science* **326**, 1216-9 (2009).
29. Gordon, M.K. & Hahn, R.A. Collagens. *Cell Tissue Res* **339**, 247-57 (2010).
30. Twardowski, T., Fertala, A., Orgel, J.P. & San Antonio, J.D. Type I collagen and collagen mimetics as angiogenesis promoting superpolymers. *Curr Pharm Des* **13**, 3608-21 (2007).
31. Tchetina, E.V. Developmental mechanisms in articular cartilage degradation in osteoarthritis. *Arthritis* **2011**, 683970 (2011).
